# Supplementary material for: Different trajectories of polyploidization shape the genomic landscape of the Brettanomyces bruxellensis yeast species
Source: HighWire-hosted journal article supplement (doi:10.1101/gr.275380.121), 2021-11-23
Supplement: Supplemental_Material.docx [file Supplemental_Material.docx]

**Supplementary Material and Methods**

**Different trajectories of polyploidization shape the genomic landscape of the *Brettanomyces bruxellensis* yeast species**

Chris Eberlein1, Omar Abou Saada1, Anne Friedrich1, Warren Albertin2,3, Joseph Schacherer1,4

**Selection of strains and DNA extraction**

For this study, we focused on a subset of 71 strain of *Brettanomyces bruxellensis.* These strains are part of the collection of 1,500 strains (Avramova, et al. 2018), which was previously analyzed using microsatellites and/or partially with whole genome sequencing data (Gounot, et al. 2020). The 71 strains were selected to represent the different clades of *B. bruxellensis* in terms of genetic diversity, ecological origin (origin of isolation) and variation in ploidy (Supplementary Table S1). Additional to 71 *B. bruxellensis* strains, four sister species (*B. anomala, B. custersianus, B. nanus, B. acidodurans*) including the type strain of *B. bruxellensis* were selected for this study (Supplementary Table S3).

The DNA of 71 strains was extracted from 20ml cultures (single colony, 48h growth at 25°C) using the QIAGEN Genomic-tip 100/G kit (Hilden, Germany) with the recommended manufacture’s genomic DNA buffer set. The manufacture’s protocol was followed as recommended and final DNA was eluded in 100-200µl water. DNA was quantified with the broad-range or high-sensitivity DNA quantification kit from Qubit (Thermo Fischer Scientific, Waltham, USA) with the use of the automated plate reading platform from TECAN (Männedorf, Switzerland). Genomic DNA was migrated on a 1.5% agarose gel to check for degradation.

**Library preparation and sequencing**

The kit NEBNext® Ultra™ II DNA Library Prep Kit (Ipswich, USA) for Illumina® (San Diego, USA) was used for library preparation. The dual-barcoding strategy was applied and samples were sequenced on two lanes of NextSeq (Illumina®) at the European Molecular Laboratory (EMBL) in Heidelberg, Germany. The strategy of sequencing was 75 paired-end (75PE) and sequences from two independent sequencing lanes were concatenated prior to any analysis.

For the long-read sequencing we used the Oxford Nanopore Technology (Oxford, UK). Libraries for sequencing using the MinION and were prepared as described in (Istace et al. 2017) using the Ligation Sequencing Kit SQK-LSK109. We barcoded strains with the Native Barcoding Expansion 1-12 (EXP-NBD104) to multiplex up to 12 samples per sequencing reaction.

**Long reads (Oxford Nanopore) sequences analysis**

**Base-calling, de-multiplexing and adapter trimming**

Raw sequencing reads were processed as described in (Fournier et al. 2017). Briefly, base-calling and de-multiplexing was done with guppy (https://nanoporetech.com/). Adapters were trimmed with Porechop (Porechop GitHub Repository https://github.com/rrwick/Porechop).

**Separating reads with different degrees of genetic variation to the reference genome**

We distinguish reads depending on their genetic difference to the reference genome *Brettanomyces bruxellensis*. For this, long reads of each sample were first aligned to the reference genome of *B. bruxellensis* (Fournier et al. 2017) using MiniMap (Li, 2018). We separated reads into two groups based on their number of SNPs/kb. Here, reads comprising less than ten variants per kb were assigned to the low intra-genomic variation cluster and reads with more than 14 variants per kb to the high intra-genomic variation cluster. Reads containing between ten to 14 variants per kb were ignored to avoid any errors of wrong-assignment, which could strongly impact *de novo* genome assemblies. We found no link between SNP density and read length, read basecalling quality, or mapping quality.

**Calculation of coverage for the low and high intra-genomic variation cluster and their ploidy**

The contribution to the overall coverage (total coverage) was calculated for the reads that clustered in the low intra-genomic variation cluster and the high intra-genomic variation cluster. This was done in 10kb non-sliding windows and used as a rough measurement of the average ploidy per strain (median coverage across strains and scaffolds: 68×). As an example, if the overall coverage for a certain region was calculated to be 60× (from reads with low and high intra-genomic variation), then a coverage of 40× for the reads with low intra-genomic variation and 20× for the reads with high intra-genomic variation would assume a triploid state at this locus, with a ratio of genomic copies of 2:1. This method was adapted to estimate different potential levels of ploidy (2n-5n).

**Phasing the polyploid genomes of the wine 2 subpopulation**

We phased six polyploid genomes of the wine 2 subpopulation with the nPhase pipeline as described in (Abou Saada et al. 2021). For this, short and long reads were aligned to the *Brettanomyces bruxellensis* reference sequence and phased by the nPhase algorithm using default parameters.

To generate pairwise divergence plots, we cross-referenced two of the files output by nPhase: (1) the *.clusterReadNames.tsv file, which contains the list of reads that comprise each cluster, found in the Phased folder and (2) the *.variants.tsv file, which contains the list of heterozygous SNPs associated with each predicted haplotig and can be found in the Phased folder as well. By combining the information in both files we were able to calculate the similarity between predicted haplotypes in 10kb windows.

In regions that have only two predicted haplotypes we have only one value, but in regions that have more than three predicted haplotypes we only kept the three longest clusters and generated three similarity values through pairwise comparison (used for potting maximal genetic distances between haplotypes).

***De novo* assemblies**

Prior to the *de novo* assemblies, files containing the raw reads (respectively with low or high intragenomic variation to the reference genome) were corrected and cleaned using Canu -correct v.1.7 (Koren et al. 2017). *De novo* assemblies were performed with SMARTdenovo (Liu et al. 2021) and the parameters -J 1000 -c 1.

**Collinearity and pairwise genetic identity of de novo assemblies**

Collinearity between *de novo* assemblies of *B. brettanomyces* strains was checked using MUMmer v.3 (<https://doi.org/10.1093/nar/27.11.2369>) and the following parameters NUCmer --mum -l 200. To check for collinearity between different species, we lowered the values and stringency to --mum -l 20 -c 30 -b 100.

**Short reads (Illumina) sequences analysis**

**Genome-wide phylogeny and estimation of ploidy**

Raw sequencing reads (not separated short reads) were aligned to the reference genome *B. bruxellensis* (Fournier et al. 2017) using BWA v0.7.17 (Li and Durbin 2009) with the default settings (mem algorithm). File format conversions, the sorting and indexing of samples were done with SAMtools v.1.9 (Li et al 2009). Variant calling was done using the Genome Analysis Tool GATK v4.1 (McKenna et al. 2010). The data from the variant calling in GATK was filtered and processed with VCFtools (Danecek et al. 2011) and BCFtools v1.9 (Li et al. 2009). Respectively, we filtered out any indels, kept only variants with a minimum coverage of 11 reads/site, removed individuals with more than 50% of missing data and reduced the data. The information of the Allele Balance for the Heterozygous sites (ABHet) was used to calculate the average allele frequencies in 10kb windows (non-sliding) in R v.3.3.3 (R Core Team 2019). Phylogenetic Neighbor-Joining trees were performed with the R packages seqinr (Charif and Lobry 2007) and phangorn (Schliep 2011) using the substitution model JC69. The final trees were plotted with Figtree v.1.4.3 (Rambaut 2009).

**Genomic-copy specific alignments**

A competitive mapping approach was used to distinguish short reads that represent the low or high intra-genomic variation. For this, the short reads of the 40 strains from the three polyploid subpopulations with low and high intra-genomic variation (teq/EtOH, beer, wine 1) were aligned to clade-specific reference genomes. These reference genomes were concatenated *de novo* assemblies, respectively prepared from low and high intra-genomic variation (long-read data) to the reference genome *B. bruxellensis*. These clade-specific reference genomes came from the polyploid strains YJS7895 (beer), YJS8039 (wine 1) and YJS7890 (teq/EtOH). Finally, to have all reads aligned to the same reference genome and to perform comparative genomic analyses, the reads from the competitive mapping approach, which either mapped on the scaffolds from the low or the high intra-genomic *de novo* assemblies, were mapped back to the reference genome of *B. bruxellensis* (Fournier et al. 2017). The 31 strains, which did not show any signals of polyploidy (wine 3, kombucha) or high intra-genomic variation (wine 2) were mapped directly to the *B. bruxellensis* reference genome. In this way, all strains were ultimately aligned to the same reference facilitating the direct comparison of genetic variation. Alignments, file conversions, file sorting, file indexing and the calculation of coverage in 10kb windows were done as described above.

**Principal Component Analysis** **and phylogenetic analysis**

Variant calling and filtering were done as described above. The program Adegenet v2.1.0 (Jombart 2008) was used to perform the Principal Component Analysis (PCA). Phylogenetic trees were generated and plotted as described above.

**Pairwise distances**

SAMtools v1.9 and BCFtools v1.9 (Li et al. 2009) were used to calculate the genotype likelihood from the bam-formatted alignment files, to call variants and to create single FASTA files for each individual strain. Genetic distances were calculated in 50 kb windows in R with the package phangorn (Schliep 2011; substitution model “JC69”) and then averaged per individual.

**Detection of regions underlying the variation in copy numbers**

Variation in copies of the low intra-genetic variation along the polyploid genomes of the 40 allopolyploid strains was calculated in 10 kb windows from the ratio of the coverage of the primary genome to the total coverage. Ploidy levels were categorized as described above. Plots were generated with the R package ggbio (Yin et al. 2012).

**Gene Ontology enrichment and candidate gene approach**

Gene Ontology enrichment were done using a reference list of 2,274 annotated genes with orthologous genes in *S. cerevisiae* (Gounot et al. 2020). Genes were considered to be enriched (and included in the analyses) when at least 50% of the strains in the two groups beer and wine 1 contained the same copy number of the gene from the primary genome. The group Tequila/Ethanol was not included in this analysis due to its few strains and the structure of two sub-groups. GO enrichment analysis was performed using with the program GOrilla (Eden et al. 2009). Candidate genes were chosen from Colomer et al. (2020) and plotted according to their position in the genome. Here, we used the gene positions from the genome annotation of Gounot et al. (2020).

**Analysis of mitochondria**

The mitochondrial *de novo* genome assemblies were constructed with a pipeline derived from Tao et al. (2019). Illumina reads were down sampled to sets of 600000, 800000 and 1000000 paired-end reads with seqtk (<https://github.com/lh3/seqtk>) and *de novo* assembly were constructed for each dataset with A5-miseq (Coil et al. 2015). Mitochondrial contigs were identified through similarity searches to the *B. bruxellensis* mitochondrial reference sequence (accession number GQ354526.1) and for each strain, a representative assembly was selected based on the number of contigs and their length. The one-contig assemblies were subjected to circlator (Hunt et al. 2015) for circularization and the starting position of the sequence was set to that of the reference genome.

Synteny between strains from each group were compared in Mauve (Darling et al. 2004) using the MauveAligner algorithm with the default parameters. Synteny was graphically displayed using the R package genoPlotR (Guy et al. 2010) and the coordinates of introns and exons. Phylogenetic trees of mitochondrial genes were prepared as described above. The concatenated tree based on eight genes, for which we had genetic information of 70 strains (*atp6*, *atp8*, *cox2*, *cox3*, *nad1*, *nad3*, *nad4*, *nad4L*, *nad6*). Genetic distances were prepared from the concatenated genes alignments with the substitution model JC69.

**References**

Abou Saada O, Tsouris A, Eberlein C, Friedrich A, Schacherer J. 2021. nPhase: an accurate and contiguous phasing method for polyploids. *Genome Biol* **22:** 126. doi:10.1186/s13059-021-02342-x.

Avramova M, Cibrario A, Peltier E, Coton M, Coton E, Schacherer J, Spano G, Capozzi V, Blaiotta G, Salin F, et al. 2018. *Brettanomyces bruxellensis* population survey reveals a diploid-triploid complex structured according to substrate of isolation and geographical distribution. *Sci Rep* **8:** 4136. doi:10.1038/s41598-018-22580-7.

Charif D, Lobry JR. 2007. SeqinR 1.0-2: A Contributed Package to the R Project for Statistical Computing Devoted to Biological Sequences Retrieval and Analysis. In: Bastolla U., Porto M., Roman H.E., Vendruscolo M. (eds) Structural Approaches to Sequence Evolution. Biological and Medical Physics, Biomedical Engineering. Springer, Berlin, Heidelberg. doi.org/10.1007/978-3-540-35306-5_10

Coil D, Jospin G, Darling AE. 2015. A5-miseq: an updated pipeline to assemble microbial genomes from Illumina MiSeq data. *Bioinformatics* **31:** 587-589. doi:10.1093/bioinformatics/btu661.

Colomer MS, Chailyan A, Fennessy RT, Olsson KF, Johnsen L, Solodovnikova N, Forster J. 2020. Assessing population diversity of *Brettanomyces* yeast species and identification of strains for brewing applications. *Front Microbiol* **11:** 637. doi:10.3389/fmicb.2020.00637.

Danecek P, Auton A, Abecasis G, Albers CA, Banks E, DePristo MA, Handsaker RE, Lunter G, Marth GT, Sherry ST, McVean G, Durbin R, 1000 Genomes Project Analysis Group. 2011. The variant call format and VCFtools. *Bioinformatics* **27:** 2156-8. doi:10.1093/bioinformatics/btr330.

Darling AC, Mau B, Blattner FR, Perna NT. 2004. Mauve: multiple alignment of conserved genomic sequence with rearrangements. *Genome Res* **14:** 1394-1403. doi:10.1101/gr.2289704.

Eden E, Navon R, Steinfeld I, Lipson D, Yakhini Z. 2009. GOrilla: a tool for discovery and visualization of enriched GO terms in ranked gene lists. *BMC Bioinformatics* **10:** 48. doi: 10.1186/1471-2105-10-48.

Fournier T, Gounot JS, Freel K, Cruaud C, Lemainque A, Aury JM, Wincker P, Schacherer J, Friedrich A. 2017. High-quality de novo genome assembly of the *Dekkera bruxellensis* yeast using Nanopore MinION sequencing. *G3 (Bethesda)* **7:** 3243-3250. doi: 10.1534/g3.117.300128.

Gounot JS, Neuvéglise C, Freel KC, Devillers H, Piškur J, Friedrich A, Schacherer J. 2020. High Complexity and degree of genetic variation in *Brettanomyces bruxellensis* population. *Genome Biol Evol* 1**2:** 795-807. doi:10.1093/gbe/evaa077.

Guy L, Kultima JR, Andersson SG. 2010. genoPlotR: comparative gene and genome visualization in R. *Bioinformatics* **26:** 2334-335. doi:10.1093/bioinformatics/btq413.

Hunt M, Silva ND, Otto TD, Parkhill J, Keane JA, Harris SR. 2015. Circlator: automated circularization of genome assemblies using long sequencing reads. *Genome Biol* **16:** 294. doi:10.1186/s13059-015-0849-0.

Istace B, Friedrich A, d'Agata L, Faye S, Payen E, Beluche O, Caradec C, Davidas S, Cruaud C, Liti G, et al. 2017. de novo assembly and population genomic survey of natural yeast isolates with the Oxford Nanopore MinION sequencer. *Gigascience* **6:** 1-13. doi:10.1093/gigascience/giw018.

Jombart T. 2008. adegenet: a R package for the multivariate analysis of genetic markers. *Bioinformatics* 24: 1403-5. doi:10.1093/bioinformatics/btn129.

Koren S, Walenz BP, Berlin K, Miller JR, Bergman NH, Phillippy AM. 2017. Canu: scalable and accurate long-read assembly via adaptive k-mer weighting and repeat separation. *Genome Res* **27:** 722-736. doi:10.1101/gr.215087.116.

Li H. 2018. Minimap2: pairwise alignment for nucleotide sequences. *Bioinformatics* **34:** 3094-3100. doi:10.1093/bioinformatics/bty191.

Li H, Durbin R. 2009. Fast and accurate short read alignment with Burrows-Wheeler transform. *Bioinformatics* **25:** 1754-60. doi:10.1093/bioinformatics/btp324.

Li H, Handsaker B, Wysoker A, Fennell T, Ruan J, Homer N, Marth G, Abecasis G, Durbin R, 1000 Genome Project Data Processing Subgroup. 2009. The Sequence Alignment/Map format and SAMtools. *Bioinformatics* **25:** 2078-2079. doi:10.1093/bioinformatics/btp352.

Liu H, Wu S, Li A, Ruan J. 2021. SMARTdenovo: a de novo assembler using long noisy reads. *Gigabyte* **1**. doi.org/10.46471/gigabyte.15.

McKenna A, Hanna M, Banks E, Sivachenko A, Cibulskis K, Kernytsky A, Garimella K, Altshuler D, Gabriel S, Daly M, DePristo MA. 2010. The Genome Analysis Toolkit: a MapReduce framework for analyzing next-generation DNA sequencing data. *Genome Res* **20:** 1297-303. doi:10.1101/gr.107524.110.

Rambaut A. 2009. FigTree, a graphical viewer of phylogenetic trees. Institute of Evolutionary Biology University of Edinburgh.

Schliep KP. 2011. phangorn: phylogenetic analysis in R. *Bioinformatics* **27:** 592-593. doi:10.1093/bioinformatics/btq706.

Tao YT, Suo F, Tusso S, Wang YK, Huang S, Wolf JBW, Du LL. 2019. Intraspecific diversity of fission yeast mitochondrial genomes. *Genome Biol Evol* 11: 2312-2329. doi:10.1093/gbe/evz165.
