# Supplementary material for: Different trajectories of polyploidization shape the genomic landscape of the Brettanomyces bruxellensis yeast species
Source: HighWire-hosted journal article supplement (doi:10.1101/gr.275380.121), 2021-11-23
Supplement: Supplemental_Tables.xlsx [file Supplemental_Tables.xlsx]

## Sheet: Table S1
Table S1: Set of 71 strains sequenced with Illumina and MinION technology.
LibraryName	Readcount_Illumina75PE	Estimated genome-wide coverage (13 Mb genome size)	GeneticGroup	ColourGeneticGroup	ID	Idbis	Region_of_Origin	Polyploid_with_acquiredCopy
I_A01_YJS7800	3698954	19.8	teq/EtOH	royalblue4	CBS 5512	CBS_5512	South Africa	Yes
I_A02_YJS7801	6392370	34.2	wine 2	turquoise	CBS_74	CBS_74	Belgium	No
I_A03_YJS7802	7364180	39.5	wine 3	darkcyan	12_LT_VGC3_c_10	12_LT_VGC3_c_10	France	No
I_A05_YJS7804	5083294	27.2	wine 2	turquoise	L1710	CB3	South Africa	No
I_A06_YJS7805	7156204	38.3	teq/EtOH	royalblue4	CBS_6055	CBS_6055	USA	Yes
I_A07_YJS7806	7575208	40.6	wine 3	darkcyan	SJ12_4	SJ12_4	France	No
I_A08_YJS7807	7100406	38	wine 2	turquoise	L1733	Gamay_329_CM_6	France	No
I_A10_YJS7809	5899958	31.6	wine 2	turquoise	ISA2211	ISA2211	Portugal	No
I_A11_YJS7810	5208832	27.9	beer	orange	ISA2397	ISA2397	Portugal	Yes
I_A12_YJS7811	10180660	54.5	wine 2	turquoise	L1739	VP1503	Italy	No
I_B01_YJS7812	5555190	29.8	wine 2	turquoise	VP1544	VP1544	Italy	No
I_B02_YJS7813	7729348	41.4	beer	orange	LB15110g	LB15110g	France	Yes
I_B03_YJS7814	10613154	56.9	beer	orange	LB15107g	LB15107g	France	Yes
I_B04_YJS7815	8612864	46.1	beer	orange	2OT14_03	2OT14_03	France	Yes
I_B05_YJS7816	9585862	51.4	beer	orange	2OT13_05	2OT13_05	France	Yes
I_B06_YJS7817	10091112	54.1	beer	orange	2OT13_07	2OT13_07	France	Yes
I_B07_YJS7818	6860140	36.8	beer	orange	L1771	2OT13_09	France	Yes
I_D12_YJS7847	7253048	38.9	beer	orange	L1735	CDR222	France	Yes
I_E01_YJS7848	6218746	33.3	wine 3	darkcyan	L1751	DEN6_12_10	Denmark	No
I_F02_YJS7861	4666678	25	beer	orange	L17112	ISA1700	Portugal	Yes
I_F11_YJS7870	2420278	13	beer	orange	L1769	2OT14_05	France	Yes
I_G01_YJS7872	5568852	29.8	wine 1	red	14_LT_S0_GV1_1	14_LT_S0_GV1_1	France	Yes
I_G03_YJS7874	5448572	29.2	wine 3	darkcyan	1961_MX_M1_E2	1961_MX_M1_E2	France	No
I_G11_YJS7882	4861628	26	beer	orange	VP1542	VP1542	Italy	Yes
I_H04_YJS7887	4812830	25.8	wine 2	turquoise	L14190	UCD_2084	Argentina	No
I_H05_YJS7888	4248888	22.8	wine 3	darkcyan	L1715	SJ12_2	France	No
I_H06_YJS7889*	6242492	33.4	teq/EtOH	royalblue4	L14169	UCD_2041	Thailand	No
I_H07_YJS7890	5338604	28.6	teq/EtOH	royalblue4	L17108	UWOPS_92__244_4	Mexico	Yes
I_H08_YJS7891	4584280	24.6	wine 2	turquoise	L0308	L0308	France	No
I_H12_YJS7895	6351858	34	beer	orange	L1749	DENN12_8	Denmark	Yes
II_A03_YJS7902	5648320	30.3	wine 1	red	L14175	UCD_2093	USA	Yes
II_A06_YJS7905	4485562	24	wine 1	red	L14174	L14174	Canada	Yes
II_A12_YJS7911	11841336	63.4	wine 3	darkcyan	L0469	L0469	France	No
II_B03_YJS7914	4653550	24.9	wine 3	darkcyan	L0614	L0614	France	No
II_B09_YJS7920	5737588	30.7	wine 3	darkcyan	L14163	L14163	New Zealand	No
II_C03_YJS7926	5025596	26.9	beer	orange	L0417	L0417	France	Yes
II_C09_YJS7932	6636086	35.6	beer	orange	L14155	L14155	Chile	Yes
II_D10_YJS7945	5537550	29.7	beer	orange	L14194	L14194	USA	Yes
II_E02_YJS7949	4897532	26.2	wine 3	darkcyan	L1714	Mauve_1991	France	No
II_E07_YJS7954	4896624	26.2	teq/EtOH	royalblue4	L1720	UWOPS_94__263_2	Mexico	Yes
II_F01_YJS7960	5066008	27.1	wine 2	turquoise	L1782	GB54	Italy	No
II_F08_YJS7967	7982664	42.8	wine 3	darkcyan	L1703	13_LT_VGC55_d_1	France	No
II_G08_YJS7979	5097248	27.3	wine 3	darkcyan	L1727	MLC_296_2014_2	France	No
III_A12_YJS8011	6136598	32.9	wine 3	darkcyan	CBS_2499	CBS_2499	UK	No
III_B03_YJS8014	5129870	27.5	teq/EtOH	royalblue4	UWOPS_92__298_4	UWOPS_92__298_4	Mexico	Yes
III_B09_YJS8020	6824420	36.6	beer	orange	NL059	NL059	France	Yes
III_BOX53_YJS5382	6972396	37.4	wine 2	turquoise	AG 2687	AG 2687	Chile	No
III_BOX53_YJS5397	6363508	34.1	beer	orange			Spain	Yes
III_BOX53_YJS5400	3911710	21	beer	orange	UMY 306	UMY 306	Italy	Yes
III_BOX53_YJS5408	6539482	35	wine 1	red	AG 1630	AG 1630	Chile	Yes
III_BOX53_YJS5434	5496348	29.4	wine 1	red	AG 2107	AG 2107	Chile	Yes
III_BOX53_YJS5454	9335260	50	beer	orange	AG 2995	AG 2995	Portugal	Yes
III_C01_YJS8024	4891356	26.2	kombucha	olivedrab3	45_3	45_3	Greece	No
III_D02_YJS8037	6378710	34.2	beer	orange	GSP1506	GSP1506	Italy	Yes
III_D04_YJS8039	7065726	37.9	wine 1	red	GB12	GB12	Italy	Yes
III_D12_YJS8047	3547932	19	wine 1	red	Argentine_1	Argentine_1	Argentina	Yes
III_E01_YJS8048	4879516	26.1	beer	orange	GB62	GB62	Italy	Yes
III_E04_YJS8051	4403538	23.6	wine 3	darkcyan	14_MX_C91_9	14_MX_C91_9	France	No
III_E10_YJS8057	4871468	26.1	wine 3	darkcyan	CDR217	CDR217	France	No
III_F01_YJS8060	4534400	24.3	wine 3	darkcyan	L1741	VP1522	Italy	No
III_F02_YJS8061	5352248	28.7	wine 3	darkcyan	VP1539	VP1539	Italy	No
III_F03_YJS8062	4320796	23.1	wine 3	darkcyan	L17111	VP1545	Italy	No
III_F09_YJS8068	6676090	35.8	teq/EtOH	royalblue4	L1745	L1745	Brazil	Yes
III_F11_YJS8070	7148800	38.3	kombucha	olivedrab3	ISA1601	ISA1601	Portugal	No
III_G06_YJS8077	5054220	27.1	beer	orange	VP1519	VP1519	Italy	Yes
III_G10_YJS8081	5556122	29.8	beer	orange	2OT14_01	2OT14_01p	France	Yes
III_G11_YJS8082	5209056	27.9	wine 1	red	2OT13_02	2OT13_02_p	France	Yes
III_H04_YJS8087	6044170	32.4	beer	orange	NL045	NL045	France	Yes
III_H05_YJS8088	6126860	32.8	beer	orange	NL050	NL050	France	Yes
III_H07_YJS8090	8168262	43.8	kombucha	olivedrab3	15_1	15_1	Greece	No
III_H09_YJS8092	3961008	21.2	wine 1	red	33_2	33_2	Greece	Yes
*Grouped initially not with other teq/EtOH strains (Figure 1B). Only in the comparative analysis after the competitive mapping approach applied for polyploid strains, I_H06_YJS7889 groups within teq/EtOH subpopulation (Figure 3B).

## Sheet: Table S2
Table S2: Statistics of de novo genome assemblies.
LibraryName	YJS_Number	GeneticGroup	GenomeCopy	Total_Assembly_Size_bp	Scaffold_Count	Average_Length_Scaffold_bp	Median_Length_Scaffold_bp	N50_bp
I_A01_YJS7800	YJS7800	teq/EtOH	Acquired	10890945	46	236759.67	165947	395183
I_A01_YJS7800	YJS7800	teq/EtOH	Primary	13002913	32	406341.03	300368	569625
I_A02_YJS7801	YJS7801	wine 2	Primary	13130351	72	182365.99	122304	292670
I_A03_YJS7802	YJS7802	wine 3	Primary	743096	24	30962.33	26826	37766
I_A05_YJS7804	YJS7804	wine 2	Primary	13055614	13	1004278.00	1194100	1394639
I_A06_YJS7805	YJS7805	teq/EtOH	Acquired	2223432	109	20398.46	16604	24637
I_A06_YJS7805	YJS7805	teq/EtOH	Primary	7677914	274	28021.58	22930	36636
I_A07_YJS7806	YJS7806	wine 3	Primary	22903	2	11451.50	5407	17496
I_A08_YJS7807	YJS7807	wine 2	Primary	6460306	127	50868.55	40605	65934
I_A10_YJS7809	YJS7809	wine 2	Primary	12946146	11	1176922.36	1142137	1452929
I_A11_YJS7810	YJS7810	beer	Acquired	NA	NA	NA	NA	NA
I_A11_YJS7810	YJS7810	beer	Primary	6262929	131	47808.62	41129	60024
I_A12_YJS7811	YJS7811	wine 2	Primary	9630884	141	68304.14	53806	98108
I_B01_YJS7812	YJS7812	wine 2	Primary	8494345	144	58988.51	47543	79463
I_B02_YJS7813	YJS7813	beer	Acquired	2971164	58	51226.97	39554	63556
I_B02_YJS7813	YJS7813	beer	Primary	11443073	102	112186.99	68646	193450
I_B03_YJS7814	YJS7814	beer	Acquired	591151	17	34773.59	29557	49135
I_B03_YJS7814	YJS7814	beer	Primary	9333974	132	70711.92	48305	105467
I_B04_YJS7815	YJS7815	beer	Acquired	24464	3	8154.67	7560	7560
I_B04_YJS7815	YJS7815	beer	Primary	2324564	67	34694.99	34146	43173
I_B05_YJS7816	YJS7816	beer	Acquired	1326934	38	34919.32	32394	41010
I_B05_YJS7816	YJS7816	beer	Primary	10180578	130	78312.14	55481	112298
I_B06_YJS7817	YJS7817	beer	Acquired	577883	15	38525.53	31455	51243
I_B06_YJS7817	YJS7817	beer	Primary	5663504	135	41951.88	32831	48978
I_B07_YJS7818	YJS7818	beer	Acquired	8328812	44	189291.18	146419	250063
I_B07_YJS7818	YJS7818	beer	Primary	12792356	13	984027.38	671499	1545264
I_D12_YJS7847	YJS7847	beer	Acquired	9176420	23	398974.78	279143	609969
I_D12_YJS7847	YJS7847	beer	Primary	13392957	14	956639.79	641587	1959571
I_E01_YJS7848	YJS7848	wine 3	Primary	13125992	11	1193272.00	1163955	2079296
I_F02_YJS7861	YJS7861	beer	Acquired	8958116	32	279941.12	220366	491827
I_F02_YJS7861	YJS7861	beer	Primary	12901009	13	992385.31	258552	1799905
I_F11_YJS7870	YJS7870	beer	Acquired	9309308	25	372372.32	280803	632801
I_F11_YJS7870	YJS7870	beer	Primary	13547041	20	677352.05	467665	1116393
I_G01_YJS7872	YJS7872	wine 1	Acquired	10252386	75	136698.48	89231	216053
I_G01_YJS7872	YJS7872	wine 1	Primary	14391335	45	319807.44	212830	609670
I_G03_YJS7874	YJS7874	wine 3	Primary	12964650	8	1620581.25	2036036	2244870
I_G11_YJS7882	YJS7882	beer	Acquired	8848590	44	201104.32	148378	270334
I_G11_YJS7882	YJS7882	beer	Primary	12771738	16	798233.62	326689	1787860
I_H04_YJS7887	YJS7887	wine 2	Primary	13022504	11	1183864.00	1280368	1567698
I_H05_YJS7888	YJS7888	wine 3	Primary	13055704	9	1450633.78	1177914	2048863
I_H06_YJS7889	YJS7889	teq/EtOH	Primary	12777367	12	1064780.58	860271	1799322
I_H07*_YJS7890	YJS7890	teq/EtOH	Acquired	11113409	33	336769.97	246343	586897
I_H07*_YJS7890	YJS7890	teq/EtOH	Primary	13204979	22	600226.32	358398	1122792
I_H08_YJS7891	YJS7891	wine 2	Primary	13341884	11	1212898.55	1374102	1882617
I_H12*_YJS7895	YJS7895	beer	Acquired	9125755	23	396771.96	266669	541460
I_H12*_YJS7895	YJS7895	beer	Primary	12951658	14	925118.43	409177	1734777
II_A03_YJS7902	YJS7902	wine 1	Acquired	10700829	78	137190.12	96578	212260
II_A03_YJS7902	YJS7902	wine 1	Primary	14298269	43	332517.88	211739	489042
II_A06_YJS7905	YJS7905	wine 1	Acquired	10180659	64	159072.80	117141	189499
II_A06_YJS7905	YJS7905	wine 1	Primary	14928612	38	392858.21	301767	561132
II_A12_YJS7911	YJS7911	wine 3	Primary	13000285	11	1181844.09	1503104	1728741
II_B03_YJS7914	YJS7914	wine 3	Primary	13102681	21	623937.19	454969	1212228
II_B09_YJS7920	YJS7920	wine 3	Primary	13490979	11	1226452.64	1242228	1973872
II_C03_YJS7926	YJS7926	beer	Acquired	8838331	27	327345.59	240720	428924
II_C03_YJS7926	YJS7926	beer	Primary	13186044	11	1198731.27	897454	1916148
II_C09_YJS7932	YJS7932	beer	Acquired	9231281	30	307709.37	209881	742977
II_C09_YJS7932	YJS7932	beer	Primary	13038465	12	1086538.75	1251581	1632389
II_D10_YJS7945	YJS7945	beer	Acquired	9000939	23	391345.17	272461	558266
II_D10_YJS7945	YJS7945	beer	Primary	13228680	13	1017590.77	1023153	1205201
II_E02_YJS7949	YJS7949	wine 3	Primary	13574267	10	1357426.70	876119	1886858
II_E07_YJS7954	YJS7954	teq/EtOH	Acquired	9720702	19	511615.89	270183	898427
II_E07_YJS7954	YJS7954	teq/EtOH	Primary	12866271	15	857751.40	600313	1396240
II_F01_YJS7960	YJS7960	wine 2	Primary	13212140	14	943724.29	731110	1447056
II_F08_YJS7967	YJS7967	wine 3	Primary	13331008	12	1110917.33	343513	2288122
II_G08_YJS7979	YJS7979	wine 3	Primary	13397507	10	1339750.70	1286584	2023389
III_A12_YJS8011	YJS8011	wine 3	Primary	12869326	7	1838475.14	1688325	3304964
III_B03_YJS8014	YJS8014	teq/EtOH	Acquired	11030901	52	212132.71	135983	338930
III_B03_YJS8014	YJS8014	teq/EtOH	Primary	12885940	20	644297.00	463142	1168072
III_B09_YJS8020	YJS8020	beer	Acquired	369485	1	369485.00	369485	369485
III_B09_YJS8020	YJS8020	beer	Primary	502320	2	251160.00	229277	273043
III_BOX53_YJS5382	YJS5382	wine 2	Primary	13003957	19	684418.79	480362	1287944
III_BOX53_YJS5397	YJS5397	beer	Acquired	8251016	25	330040.64	205375	547972
III_BOX53_YJS5397	YJS5397	beer	Primary	13000206	10	1300020.60	1029501	1841606
III_BOX53_YJS5400	YJS5400	beer	Acquired	9078742	30	302624.73	237391	420703
III_BOX53_YJS5400	YJS5400	beer	Primary	12805287	12	1067107.25	397817	1854329
III_BOX53_YJS5408	YJS5408	wine 1	Acquired	9704877	74	131146.99	107736	172455
III_BOX53_YJS5408	YJS5408	wine 1	Primary	14083249	35	402378.54	376590	595418
III_BOX53_YJS5434	YJS5434	wine 1	Acquired	11138006	66	168757.67	117148	195862
III_BOX53_YJS5434	YJS5434	wine 1	Primary	14801174	37	400031.73	280516	582876
III_BOX53_YJS5454	YJS5454	beer	Acquired	8833276	32	276039.88	187945	421217
III_BOX53_YJS5454	YJS5454	beer	Primary	12743153	10	1274315.30	648053	3249701
III_C01_YJS8024	YJS8024	kombucha	Primary	13534061	13	1041081.62	754856	1622048
III_D02_YJS8037	YJS8037	beer	Acquired	9082441	21	432497.19	331852	607910
III_D02_YJS8037	YJS8037	beer	Primary	13141610	12	1095134.17	1207484	1403591
III_D04*_YJS8039	YJS8039	wine 1	Acquired	10615856	65	163320.86	107418	246019
III_D04*_YJS8039	YJS8039	wine 1	Primary	14993313	40	374832.83	305920	586917
III_D12_YJS8047	YJS8047	wine 1	Acquired	9429624	158	59681.16	45703	83599
III_D12_YJS8047	YJS8047	wine 1	Primary	13042934	87	149918.78	98258	253401
III_E01_YJS8048	YJS8048	beer	Acquired	8646243	118	73273.25	52775	118732
III_E01_YJS8048	YJS8048	beer	Primary	12722351	37	343847.32	189180	726536
III_E04_YJS8051	YJS8051	wine 3	Primary	13095778	10	1309577.80	1498241	1629392
III_E10_YJS8057	YJS8057	wine 3	Primary	13162566	12	1096880.50	420076	2648687
III_F01_YJS8060	YJS8060	wine 3	Primary	13067391	8	1633423.88	1551783	2170192
III_F02_YJS8061	YJS8061	wine 3	Primary	12984935	10	1298493.50	1073144	2149413
III_F03_YJS8062	YJS8062	wine 3	Primary	13155869	19	692414.16	586146	1182406
III_F09_YJS8068	YJS8068	teq/EtOH	Acquired	3891134	103	37778.00	23644	55952
III_F09_YJS8068	YJS8068	teq/EtOH	Primary	12259158	60	204319.30	100797	441887
III_F11_YJS8070	YJS8070	kombucha	Primary	13222554	11	1202050.36	875648	1458532
III_G06_YJS8077	YJS8077	beer	Acquired	8660284	56	154647.93	108509	248094
III_G06_YJS8077	YJS8077	beer	Primary	12883177	20	644158.85	383487	998534
III_G10_YJS8081	YJS8081	beer	Acquired	9003151	23	391441.35	267728	551358
III_G10_YJS8081	YJS8081	beer	Primary	12920677	9	1435630.78	1398958	1856970
III_G11_YJS8082	YJS8082	wine 1	Acquired	9895947	109	90788.50	65361	135528
III_G11_YJS8082	YJS8082	wine 1	Primary	13613375	60	226889.58	114375	475844
III_H04_YJS8087	YJS8087	beer	Acquired	9155177	33	277429.61	227075	578129
III_H04_YJS8087	YJS8087	beer	Primary	12945386	18	719188.11	457680	1317214
III_H05_YJS8088	YJS8088	beer	Acquired	8104240	63	128638.73	121894	197727
III_H05_YJS8088	YJS8088	beer	Primary	12770743	26	491182.42	209308	1384830
III_H07_YJS8090	YJS8090	kombucha	Primary	12936815	12	1078067.92	588472	1525867
III_H09_YJS8092	YJS8092	wine 1	Acquired	9101102	135	67415.57	55205	89541
III_H09_YJS8092	YJS8092	wine 1	Primary	13109212	72	182072.39	106808	298010
*Used as concateaned reference genome to separate short sequencing reads into low and intra-genomic variation to the reference genome

## Sheet: Table S3
Table S3: De novo assembly statistics for the sister species of Brettanomyces bruxellensis.
Species	Strain name	Strain ID	Other ID	Origin	Substrate
Brettanomyces bruxellensis	NRRL Y-12961 T	ATCC 36234=CBS 74=CCRC 21414=CCY 59-2-1=DBVPG 6706=IFO 1590=NCYC 823	Belgium	Belgium, beer Belgique, Biere, 1938 Type of Dekkera bruxellensis Van der Walt, isolated by M.T.J. Custers, LcIII, Sep 1938	Beer
Brettanomyces anomala	NRRL Y-17522 T	ATCC 58985=CBS 8139=JCM 31686=van Grinsven 10300	The Netherlands	Spoiled soft drink, The Netherlands	Soft drinks
Brettanomyces nanus	NRRL Y-17527 T	ATCC 48014=CBS 1945=CCRC 21335	Sweden	Bottled beer, Kalmar brewery, Sweden	Beer
Brettanomyces custersianus	NRRL Y-6653 T	ATCC 34446=CBS 4805=CCRC 21516=DBVPG 6709=IFO 1585=VKM Y-1419	South Africa	Bantu beer brewery, South Africa	Beer
Brettanomyces acidodurans	NCAIM Y.02178 T	CBS 14519T = NRRL Y-63865T = ZIM 2626T	Spain	Isolated from olive oil originating from Lucena, Cordoba, Spain, in 2016	Olive oil

## Sheet: Table S4
Table S4: GO enrichment source information with (1) background list with known orthologs in S. cerevisiae, (2) genes in 3 copies in Wine1 but in less copies in Beer calde of B. bruxellensis, (3) and genes with 3 copies in Beer but with less in Wine1 in B. bruxellensis; see column Dataset.
input	reason	matches	symbol	organism.shortName	name	length	secondaryIdentifier	primaryIdentifier	class	Dataset
YPR180W	MATCH	1	AOS1	S. cerevisiae	Activation Of Smt3p	1044	YPR180W	S000006384	ORF	Background_List
YHR208W	MATCH	1	BAT1	S. cerevisiae	Branched-chain Amino acid Transaminase	1182	YHR208W	S000001251	ORF	Background_List
YER007C-A	MATCH	1	TMA20	S. cerevisiae	Translation Machinery Associated	649	YER007C-A	S000002957	ORF	Background_List
YJR035W	MATCH	1	RAD26	S. cerevisiae	RADiation sensitive	3258	YJR035W	S000003796	ORF	Background_List
YLR308W	MATCH	1	CDA2	S. cerevisiae	Chitin DeAcetylase	939	YLR308W	S000004299	ORF	Background_List
YNR002C	MATCH	1	ATO2	S. cerevisiae	Ammonia (Ammonium) Transport Outward	849	YNR002C	S000005285	ORF	Background_List
YBR187W	MATCH	1	GDT1	S. cerevisiae	Gcr1 Dependent Translation factor	843	YBR187W	S000000391	ORF	Background_List
YPR181C	MATCH	1	SEC23	S. cerevisiae	SECretory	2307	YPR181C	S000006385	ORF	Background_List
YBL071W-A	MATCH	1	KTI11	S. cerevisiae	Kluveromyces lactis Toxin Insensitive	249	YBL071W-A	S000007587	ORF	Background_List
YDR109C	MATCH	1		S. cerevisiae		2148	YDR109C	S000002516	ORF	Background_List
YGL216W	MATCH	1	KIP3	S. cerevisiae	KInesin related Protein	2418	YGL216W	S000003184	ORF	Background_List
YPL175W	MATCH	1	SPT14	S. cerevisiae	SuPpressor of Ty	1459	YPL175W	S000006096	ORF	Background_List
YJL115W	MATCH	1	ASF1	S. cerevisiae	Anti-Silencing Function	840	YJL115W	S000003651	ORF	Background_List
YJR034W	MATCH	1	PET191	S. cerevisiae	PETite colonies	327	YJR034W	S000003795	ORF	Background_List
YFL016C	MATCH	1	MDJ1	S. cerevisiae	Mitochondrial DnaJ	1536	YFL016C	S000001878	ORF	Background_List
YPR094W	MATCH	1	RDS3	S. cerevisiae	Regulator of Drug Sensitivity	324	YPR094W	S000006298	ORF	Background_List
YNR001C	MATCH	1	CIT1	S. cerevisiae	CITrate synthase	1440	YNR001C	S000005284	ORF	Background_List
YOR119C	MATCH	1	RIO1	S. cerevisiae	RIght Open reading frame	1455	YOR119C	S000005645	ORF	Background_List
YLR081W	MATCH	1	GAL2	S. cerevisiae	GALactose metabolism	1725	YLR081W	S000004071	ORF	Background_List
YMR285C	MATCH	1	NGL2	S. cerevisiae		1548	YMR285C	S000004898	ORF	Background_List
YJL200C	MATCH	1	ACO2	S. cerevisiae	ACOnitase	2370	YJL200C	S000003736	ORF	Background_List
YPR098C	MATCH	1	TMH18	S. cerevisiae	TMem205 Homolog of 18 kDa	582	YPR098C	S000006302	ORF	Background_List
YEL031W	MATCH	1	SPF1	S. cerevisiae	Sensitivity to Pichia Farinosa killer toxin	3648	YEL031W	S000000757	ORF	Background_List
YOR118W	MATCH	1	RTC5	S. cerevisiae	Restriction of Telomere Capping	1704	YOR118W	S000005644	ORF	Background_List
YLR439W	MATCH	1	MRPL4	S. cerevisiae	Mitochondrial Ribosomal Protein, Large subunit	960	YLR439W	S000004431	ORF	Background_List
YLR306W	MATCH	1	UBC12	S. cerevisiae	UBiquitin-Conjugating	701	YLR306W	S000004297	ORF	Background_List
YPL087W	MATCH	1	YDC1	S. cerevisiae	Yeast DihydroCeramidase	954	YPL087W	S000006008	ORF	Background_List
YNL212W	MATCH	1	VID27	S. cerevisiae	Vacuolar Import and Degradation	2349	YNL212W	S000005156	ORF	Background_List
YIL043C	MATCH	1	CBR1	S. cerevisiae	Cytochrome b Reductase	855	YIL043C	S000001305	ORF	Background_List
YCR036W	MATCH	1	RBK1	S. cerevisiae	RiBoKinase	1002	YCR036W	S000000632	ORF	Background_List
YJR032W	MATCH	1	CPR7	S. cerevisiae	Cyclosporin-sensitive Proline Rotamase	1182	YJR032W	S000003793	ORF	Background_List
YBL045C	MATCH	1	COR1	S. cerevisiae	CORe protein of QH2 cytochrome c reductase	1374	YBL045C	S000000141	ORF	Background_List
YEL032W	MATCH	1	MCM3	S. cerevisiae	MiniChromosome Maintenance	2916	YEL032W	S000000758	ORF	Background_List
YML012W	MATCH	1	ERV25	S. cerevisiae	ER Vesicle	636	YML012W	S000004473	ORF	Background_List
YOR202W	MATCH	1	HIS3	S. cerevisiae	HIStidine	663	YOR202W	S000005728	ORF	Background_List
YMR020W	MATCH	1	FMS1	S. cerevisiae	Fenpropimorph-resistance Multicopy Suppressor	1527	YMR020W	S000004622	ORF	Background_List
YMR286W	MATCH	1	MRPL33	S. cerevisiae	Mitochondrial Ribosomal Protein, Large subunit	261	YMR286W	S000004899	ORF	Background_List
YNL259C	MATCH	1	ATX1	S. cerevisiae	AnTioXidant	222	YNL259C	S000005203	ORF	Background_List
YOR117W	MATCH	1	RPT5	S. cerevisiae	Regulatory Particle Triple-A protein, or Regulatory Particle Triphosphatase	1305	YOR117W	S000005643	ORF	Background_List
YNR003C	MATCH	1	RPC34	S. cerevisiae	RNA Polymerase C	954	YNR003C	S000005286	ORF	Background_List
YDR320C-A	MATCH	1	DAD4	S. cerevisiae	Duo1 And Dam1 interacting	219	YDR320C-A	S000007604	ORF	Background_List
YDR412W	MATCH	1	RRP17	S. cerevisiae	Ribosomal RNA Processing	708	YDR412W	S000002820	ORF	Background_List
YGR223C	MATCH	1	HSV2	S. cerevisiae	Homologous with SVP1	1347	YGR223C	S000003455	ORF	Background_List
YER082C	MATCH	1	UTP7	S. cerevisiae	U Three Protein	1665	YER082C	S000000884	ORF	Background_List
YOR335C	MATCH	1	ALA1	S. cerevisiae	ALAnyl-tRNA synthetase	2877	YOR335C	S000005862	ORF	Background_List
YDR328C	MATCH	1	SKP1	S. cerevisiae	Suppressor of Kinetochore Protein mutant	585	YDR328C	S000002736	ORF	Background_List
YGR005C	MATCH	1	TFG2	S. cerevisiae	Transcription Factor G	1203	YGR005C	S000003237	ORF	Background_List
YLR085C	MATCH	1	ARP6	S. cerevisiae	Actin-Related Protein	1317	YLR085C	S000004075	ORF	Background_List
YCR035C	MATCH	1	RRP43	S. cerevisiae	Ribosomal RNA Processing	1185	YCR035C	S000000631	ORF	Background_List
YFR025C	MATCH	1	HIS2	S. cerevisiae	HIStidine requiring	1008	YFR025C	S000001921	ORF	Background_List
YDR322W	MATCH	1	MRPL35	S. cerevisiae	Mitochondrial Ribosomal Protein, Large subunit	1104	YDR322W	S000002730	ORF	Background_List
YDR237W	MATCH	1	MRPL7	S. cerevisiae	Mitochondrial Ribosomal Protein, Large subunit	879	YDR237W	S000002645	ORF	Background_List
YML055W	MATCH	1	SPC2	S. cerevisiae	Signal Peptidase Complex	537	YML055W	S000004519	ORF	Background_List
YLR170C	MATCH	1	APS1	S. cerevisiae	clathrin Associated Protein complex Small subunit	471	YLR170C	S000004160	ORF	Background_List
YPR184W	MATCH	1	GDB1	S. cerevisiae	Glycogen DeBranching	4611	YPR184W	S000006388	ORF	Background_List
YLL031C	MATCH	1	GPI13	S. cerevisiae	GlycosylPhosphatidylInositol anchor biosynthesis	3054	YLL031C	S000003954	ORF	Background_List
YPR051W	MATCH	1	MAK3	S. cerevisiae	MAintenance of Killer	531	YPR051W	S000006255	ORF	Background_List
YDL097C	MATCH	1	RPN6	S. cerevisiae	Regulatory Particle Non-ATPase	1305	YDL097C	S000002255	ORF	Background_List
YOL060C	MATCH	1	MAM3	S. cerevisiae		2121	YOL060C	S000005421	ORF	Background_List
YOR209C	MATCH	1	NPT1	S. cerevisiae	Nicotinate PhosphoribosylTransferase	1290	YOR209C	S000005735	ORF	Background_List
YDL181W	MATCH	1	INH1	S. cerevisiae	INHibitor (of F1F0-ATPase)	258	YDL181W	S000002340	ORF	Background_List
YCR034W	MATCH	1	ELO2	S. cerevisiae	fatty acid ELOngation	1044	YCR034W	S000000630	ORF	Background_List
YBR011C	MATCH	1	IPP1	S. cerevisiae	Inorganic PyroPhosphatase	864	YBR011C	S000000215	ORF	Background_List
YER174C	MATCH	1	GRX4	S. cerevisiae	GlutaRedoXin	735	YER174C	S000000976	ORF	Background_List
YDR105C	MATCH	1	TMS1	S. cerevisiae		1422	YDR105C	S000002512	ORF	Background_List
YGR220C	MATCH	1	MRPL9	S. cerevisiae	Mitochondrial Ribosomal Protein, Large subunit	810	YGR220C	S000003452	ORF	Background_List
YER089C	MATCH	1	PTC2	S. cerevisiae	Phosphatase Two C	1395	YER089C	S000000891	ORF	Background_List
YDR238C	MATCH	1	SEC26	S. cerevisiae	SECretory	2922	YDR238C	S000002646	ORF	Background_List
YNL218W	MATCH	1	MGS1	S. cerevisiae	Maintenance of Genome Stability	1764	YNL218W	S000005162	ORF	Background_List
YHR205W	MATCH	1	SCH9	S. cerevisiae		2475	YHR205W	S000001248	ORF	Background_List
YGR135W	MATCH	1	PRE9	S. cerevisiae	PRoteinase yscE	777	YGR135W	S000003367	ORF	Background_List
YJL026W	MATCH	1	RNR2	S. cerevisiae	RiboNucleotide Reductase	1200	YJL026W	S000003563	ORF	Background_List
YMR288W	MATCH	1	HSH155	S. cerevisiae	Human Sap Homolog	2916	YMR288W	S000004901	ORF	Background_List
YJR078W	MATCH	1	BNA2	S. cerevisiae	Biosynthesis of Nicotinic Acid	1362	YJR078W	S000003839	ORF	Background_List
YMR022W	MATCH	1	UBC7	S. cerevisiae	UBiquitin-Conjugating enzyme	498	YMR022W	S000004624	ORF	Background_List
YIL088C	MATCH	1	AVT7	S. cerevisiae	Amino acid Vacuolar Transport	1473	YIL088C	S000001350	ORF	Background_List
YNL302C	MATCH	1	RPS19B	S. cerevisiae	Ribosomal Protein of the Small subunit	986	YNL302C	S000005246	ORF	Background_List
YPL170W	MATCH	1	DAP1	S. cerevisiae	DAmage resistance Protein	459	YPL170W	S000006091	ORF	Background_List
YML054C	MATCH	1	CYB2	S. cerevisiae	CYtochrome B	1776	YML054C	S000004518	ORF	Background_List
YMR023C	MATCH	1	MSS1	S. cerevisiae	Mitochondrial Splicing System	1581	YMR023C	S000004625	ORF	Background_List
YPL086C	MATCH	1	ELP3	S. cerevisiae	ELongator Protein	1674	YPL086C	S000006007	ORF	Background_List
YDR019C	MATCH	1	GCV1	S. cerevisiae	GlyCine cleaVage	1203	YDR019C	S000002426	ORF	Background_List
YLR083C	MATCH	1	EMP70	S. cerevisiae		2004	YLR083C	S000004073	ORF	Background_List
YDR410C	MATCH	1	STE14	S. cerevisiae	STErile	720	YDR410C	S000002818	ORF	Background_List
YML057W	MATCH	1	CMP2	S. cerevisiae	CalModulin binding Protein	1815	YML057W	S000004521	ORF	Background_List
YBR056W	MATCH	1		S. cerevisiae		1506	YBR056W	S000000260	ORF	Background_List
YMR241W	MATCH	1	YHM2	S. cerevisiae	Yeast suppressor of HM mutant	945	YMR241W	S000004854	ORF	Background_List
YER086W	MATCH	1	ILV1	S. cerevisiae	IsoLeucine-plus-Valine requiring	1731	YER086W	S000000888	ORF	Background_List
YNL301C	MATCH	1	RPL18B	S. cerevisiae	Ribosomal Protein of the Large subunit	993	YNL301C	S000005245	ORF	Background_List
YER171W	MATCH	1	RAD3	S. cerevisiae	RADiation sensitive	2337	YER171W	S000000973	ORF	Background_List
YOR207C	MATCH	1	RET1	S. cerevisiae	Reduced Efficiency of Termination	3450	YOR207C	S000005733	ORF	Background_List
YBR274W	MATCH	1	CHK1	S. cerevisiae	CHeckpoint Kinase	1584	YBR274W	S000000478	ORF	Background_List
YJL111W	MATCH	1	CCT7	S. cerevisiae	Chaperonin Containing TCP-1	1653	YJL111W	S000003647	ORF	Background_List
YOL061W	MATCH	1	PRS5	S. cerevisiae	PhosphoRibosylpyrophosphate Synthetase	1491	YOL061W	S000005422	ORF	Background_List
YBL041W	MATCH	1	PRE7	S. cerevisiae	PRoteinase yscE	726	YBL041W	S000000137	ORF	Background_List
YEL036C	MATCH	1	ANP1	S. cerevisiae	ANP and osmotic sensitive	1503	YEL036C	S000000762	ORF	Background_List
YER172C	MATCH	1	BRR2	S. cerevisiae	Bad Response to Refrigeration	6492	YER172C	S000000974	ORF	Background_List
YEL037C	MATCH	1	RAD23	S. cerevisiae	RADiation sensitive	1197	YEL037C	S000000763	ORF	Background_List
YGR266W	MATCH	1		S. cerevisiae		2106	YGR266W	S000003498	ORF	Background_List
YFR028C	MATCH	1	CDC14	S. cerevisiae	Cell Division Cycle	1656	YFR028C	S000001924	ORF	Background_List
YLL034C	MATCH	1	RIX7	S. cerevisiae	RIbosome eXport	2514	YLL034C	S000003957	ORF	Background_List
YGR048W	MATCH	1	UFD1	S. cerevisiae	Ubiquitin Fusion Degradation protein	1086	YGR048W	S000003280	ORF	Background_List
YOR206W	MATCH	1	NOC2	S. cerevisiae	NucleOlar Complex associated	2133	YOR206W	S000005732	ORF	Background_List
YER170W	MATCH	1	ADK2	S. cerevisiae	ADenylate Kinase	678	YER170W	S000000972	ORF	Background_List
YBR142W	MATCH	1	MAK5	S. cerevisiae	MAintenance of Killer	2322	YBR142W	S000000346	ORF	Background_List
YDL095W	MATCH	1	PMT1	S. cerevisiae	Protein O-MannosylTransferase	2454	YDL095W	S000002253	ORF	Background_List
YBR143C	MATCH	1	SUP45	S. cerevisiae	SUPpressor	1314	YBR143C	S000000347	ORF	Background_List
YDR456W	MATCH	1	NHX1	S. cerevisiae	Na+/H+ eXchanger	1902	YDR456W	S000002864	ORF	Background_List
YMR243C	MATCH	1	ZRC1	S. cerevisiae	Zinc Resistance Conferring	1329	YMR243C	S000004856	ORF	Background_List
YDR324C	MATCH	1	UTP4	S. cerevisiae	U Three Protein	2331	YDR324C	S000002732	ORF	Background_List
YGR001C	MATCH	1	EFM5	S. cerevisiae	Elongation Factor Methyltransferase	902	YGR001C	S000003233	ORF	Background_List
YMR110C	MATCH	1	HFD1	S. cerevisiae	Homolog of Fatty aldehyde Dehydrogenase	1599	YMR110C	S000004716	ORF	Background_List
YNR046W	MATCH	1	TRM112	S. cerevisiae	TRna Methyltransferase	408	YNR046W	S000005329	ORF	Background_List
YBR058C	MATCH	1	UBP14	S. cerevisiae	UBiquitin-specific Protease	2346	YBR058C	S000000262	ORF	Background_List
YML056C	MATCH	1	IMD4	S. cerevisiae	IMP Dehydrogenase	1983	YML056C	S000004520	ORF	Background_List
YNL121C	MATCH	1	TOM70	S. cerevisiae	Translocase of the Outer Mitochondrial membrane	1854	YNL121C	S000005065	ORF	Background_List
YLR089C	MATCH	1	ALT1	S. cerevisiae	ALanine Transaminase	1779	YLR089C	S000004079	ORF	Background_List
YMR026C	MATCH	1	PEX12	S. cerevisiae	PEroXin	1200	YMR026C	S000004628	ORF	Background_List
YPL001W	MATCH	1	HAT1	S. cerevisiae	Histone AcetylTransferase	1125	YPL001W	S000005922	ORF	Background_List
YKL182W	MATCH	1	FAS1	S. cerevisiae	Fatty Acid Synthetase	6156	YKL182W	S000001665	ORF	Background_List
YHR200W	MATCH	1	RPN10	S. cerevisiae	Regulatory Particle Non-ATPase	807	YHR200W	S000001243	ORF	Background_List
YMR158W	MATCH	1	MRPS8	S. cerevisiae	Mitochondrial Ribosomal Protein, Small subunit	468	YMR158W	S000004767	ORF	Background_List
YIL138C	MATCH	1	TPM2	S. cerevisiae	TroPoMyosin	486	YIL138C	S000001400	ORF	Background_List
YOR027W	MATCH	1	STI1	S. cerevisiae	STress Inducible	1770	YOR027W	S000005553	ORF	Background_List
YER177W	MATCH	1	BMH1	S. cerevisiae	Brain Modulosignalin Homolog	804	YER177W	S000000979	ORF	Background_List
YNL036W	MATCH	1	NCE103	S. cerevisiae	NonClassical Export	666	YNL036W	S000004981	ORF	Background_List
YBR094W	MATCH	1	PBY1	S. cerevisiae	P-BodY associated protein	2262	YBR094W	S000000298	ORF	Background_List
YLR088W	MATCH	1	GAA1	S. cerevisiae	GPI Anchor Attachment	1845	YLR088W	S000004078	ORF	Background_List
YOR244W	MATCH	1	ESA1	S. cerevisiae		1338	YOR244W	S000005770	ORF	Background_List
YOR245C	MATCH	1	DGA1	S. cerevisiae	DiacylGlycerol Acyltransferase	1257	YOR245C	S000005771	ORF	Background_List
YGR264C	MATCH	1	MES1	S. cerevisiae	MEthionyl-tRNA Synthetase	2256	YGR264C	S000003496	ORF	Background_List
YGL123W	MATCH	1	RPS2	S. cerevisiae	Ribosomal Protein of the Small subunit	765	YGL123W	S000003091	ORF	Background_List
YIL003W	MATCH	1	CFD1	S. cerevisiae	Cytosolic Fe-S cluster Deficient	882	YIL003W	S000001265	ORF	Background_List
YNL035C	MATCH	1		S. cerevisiae		1170	YNL035C	S000004980	ORF	Background_List
YFL055W	MATCH	1	AGP3	S. cerevisiae	high-Affinity Glutamine Permease	1677	YFL055W	S000001839	ORF	Background_List
YKL099C	MATCH	1	UTP11	S. cerevisiae	U Three Protein	753	YKL099C	S000001582	ORF	Background_List
YMR244W	MATCH	1		S. cerevisiae		1068	YMR244W	S000004858	ORF	Background_List
YER056C-A	MATCH	1	RPL34A	S. cerevisiae	Ribosomal Protein of the Large subunit	763	YER056C-A	S000002135	ORF	Background_List
YEL038W	MATCH	1	UTR4	S. cerevisiae	Unidentified TRanscript	684	YEL038W	S000000764	ORF	Background_List
YNR041C	MATCH	1	COQ2	S. cerevisiae	COenzyme Q	1119	YNR041C	S000005324	ORF	Background_List
YNL168C	MATCH	1	FMP41	S. cerevisiae	Found in Mitochondrial Proteome	780	YNL168C	S000005112	ORF	Background_List
YPL135W	MATCH	1	ISU1	S. cerevisiae	IScU homolog	498	YPL135W	S000006056	ORF	Background_List
YFR029W	MATCH	1	PTR3	S. cerevisiae	Peptide TRansport	2037	YFR029W	S000001925	ORF	Background_List
YJL208C	MATCH	1	NUC1	S. cerevisiae	NUClease	990	YJL208C	S000003744	ORF	Background_List
YOR025W	MATCH	1	HST3	S. cerevisiae	Homolog of SIR Two (SIR2)	1344	YOR025W	S000005551	ORF	Background_List
YDR418W	MATCH	1	RPL12B	S. cerevisiae	Ribosomal Protein of the Large subunit	498	YDR418W	S000002826	ORF	Background_List
YPL002C	MATCH	1	SNF8	S. cerevisiae	Sucrose NonFermenting	702	YPL002C	S000005923	ORF	Background_List
YGR047C	MATCH	1	TFC4	S. cerevisiae	Transcription Factor class C	3078	YGR047C	S000003279	ORF	Background_List
YER044C	MATCH	1	ERG28	S. cerevisiae	ERGosterol biosynthesis	447	YER044C	S000000846	ORF	Background_List
YGR132C	MATCH	1	PHB1	S. cerevisiae	ProHiBitin	864	YGR132C	S000003364	ORF	Background_List
YOR159C	MATCH	1	SME1	S. cerevisiae	Sm protein E	285	YOR159C	S000005685	ORF	Background_List
YNL252C	MATCH	1	MRPL17	S. cerevisiae	Mitochondrial Ribosomal Protein, Large subunit	846	YNL252C	S000005196	ORF	Background_List
YLR172C	MATCH	1	DPH5	S. cerevisiae	DiPHthamide	903	YLR172C	S000004162	ORF	Background_List
YKL180W	MATCH	1	RPL17A	S. cerevisiae	Ribosomal Protein of the Large subunit	861	YKL180W	S000001663	ORF	Background_List
YHR202W	MATCH	1		S. cerevisiae		1809	YHR202W	S000001245	ORF	Background_List
YPL132W	MATCH	1	COX11	S. cerevisiae	Cytochrome c OXidase	903	YPL132W	S000006053	ORF	Background_List
YMR027W	MATCH	1		S. cerevisiae		1413	YMR027W	S000004629	ORF	Background_List
YER042W	MATCH	1	MXR1	S. cerevisiae	peptide Methionine sulfoXide Reductase	555	YER042W	S000000844	ORF	Background_List
YPL265W	MATCH	1	DIP5	S. cerevisiae	DIcarboxylic amino acid Permease	1827	YPL265W	S000006186	ORF	Background_List
YHR203C	MATCH	1	RPS4B	S. cerevisiae	Ribosomal Protein of the Small subunit	1055	YHR203C	S000001246	ORF	Background_List
YGR262C	MATCH	1	BUD32	S. cerevisiae	BUD site selection	786	YGR262C	S000003494	ORF	Background_List
YGL037C	MATCH	1	PNC1	S. cerevisiae	Pyrazinamidase and NiCotinamidase	651	YGL037C	S000003005	ORF	Background_List
YMR028W	MATCH	1	TAP42	S. cerevisiae	Two A phosphatase Associated Protein	1101	YMR028W	S000004630	ORF	Background_List
YER043C	MATCH	1	SAH1	S. cerevisiae	S-Adenosyl-l-Homocysteine hydrolase	1350	YER043C	S000000845	ORF	Background_List
YGL169W	MATCH	1	SUA5	S. cerevisiae	Suppressor of Upstream AUG	1281	YGL169W	S000003137	ORF	Background_List
YOR243C	MATCH	1	PUS7	S. cerevisiae	PseudoUridine Synthase	2031	YOR243C	S000005769	ORF	Background_List
YNR043W	MATCH	1	MVD1	S. cerevisiae	MeValonate pyrophosphate Decarboxylase	1191	YNR043W	S000005326	ORF	Background_List
YLR086W	MATCH	1	SMC4	S. cerevisiae	Structural Maintenance of Chromosomes	4257	YLR086W	S000004076	ORF	Background_List
YDR061W	MATCH	1		S. cerevisiae		1620	YDR061W	S000002468	ORF	Background_List
YLR040C	MATCH	1	AFB1	S. cerevisiae	A-Factor Barrier	675	YLR040C	S000004030	ORF	Background_List
YIL134W	MATCH	1	FLX1	S. cerevisiae	FLavin eXchange	936	YIL134W	S000001396	ORF	Background_List
YBR093C	MATCH	1	PHO5	S. cerevisiae	PHOsphate metabolism	1404	YBR093C	S000000297	ORF	Background_List
YMR113W	MATCH	1	FOL3	S. cerevisiae	FOLic acid synthesis	1284	YMR113W	S000004719	ORF	Background_List
YBL004W	MATCH	1	UTP20	S. cerevisiae	U Three Protein	7482	YBL004W	S000000100	ORF	Background_List
YNL250W	MATCH	1	RAD50	S. cerevisiae	RADiation sensitive	3939	YNL250W	S000005194	ORF	Background_List
YKL181W	MATCH	1	PRS1	S. cerevisiae	PhosphoRibosylpyrophosphate Synthetase	1284	YKL181W	S000001664	ORF	Background_List
YPL048W	MATCH	1	CAM1	S. cerevisiae	Calcium And Membrane-binding protein	1248	YPL048W	S000005969	ORF	Background_List
YDL052C	MATCH	1	SLC1	S. cerevisiae	SphingoLipid Compensation	912	YDL052C	S000002210	ORF	Background_List
YOR241W	MATCH	1	MET7	S. cerevisiae	METhionine requiring	1647	YOR241W	S000005767	ORF	Background_List
YPL133C	MATCH	1	RDS2	S. cerevisiae	Regulator of Drug Sensitivity	1341	YPL133C	S000006054	ORF	Background_List
YDL051W	MATCH	1	LHP1	S. cerevisiae	La-Homologous Protein	828	YDL051W	S000002209	ORF	Background_List
YOR374W	MATCH	1	ALD4	S. cerevisiae	ALdehyde Dehydrogenase	1560	YOR374W	S000005901	ORF	Background_List
YOR157C	MATCH	1	PUP1	S. cerevisiae	PUtative Proteasome subunit	786	YOR157C	S000005683	ORF	Background_List
YER175C	MATCH	1	TMT1	S. cerevisiae	Trans-aconitate MethylTransferase	900	YER175C	S000000977	ORF	Background_List
YOR375C	MATCH	1	GDH1	S. cerevisiae	Glutamate DeHydrogenase	1365	YOR375C	S000005902	ORF	Background_List
YDR060W	MATCH	1	MAK21	S. cerevisiae	MAintenance of Killer	3078	YDR060W	S000002467	ORF	Background_List
YGL253W	MATCH	1	HXK2	S. cerevisiae	HeXoKinase	1461	YGL253W	S000003222	ORF	Background_List
YLR130C	MATCH	1	ZRT2	S. cerevisiae	Zinc-Regulated Transporter	1269	YLR130C	S000004120	ORF	Background_List
YLR178C	MATCH	1	TFS1	S. cerevisiae	cdc Twenty-Five Suppressor	660	YLR178C	S000004168	ORF	Background_List
YHR026W	MATCH	1	VMA16	S. cerevisiae	Vacuolar Membrane Atpase	642	YHR026W	S000001068	ORF	Background_List
YHR111W	MATCH	1	UBA4	S. cerevisiae	UBiquitin-Activating	1323	YHR111W	S000001153	ORF	Background_List
YNL125C	MATCH	1	ESBP6	S. cerevisiae		2022	YNL125C	S000005069	ORF	Background_List
YER133W	MATCH	1	GLC7	S. cerevisiae	GLyCogen	1464	YER133W	S000000935	ORF	Background_List
YDL141W	MATCH	1	BPL1	S. cerevisiae	Biotin:apoProtein Ligase	2073	YDL141W	S000002300	ORF	Background_List
YHR027C	MATCH	1	RPN1	S. cerevisiae	Regulatory Particle Non-ATPase	2982	YHR027C	S000001069	ORF	Background_List
YML094W	MATCH	1	GIM5	S. cerevisiae	Gene Involved in Microtubule biogenesis	575	YML094W	S000004559	ORF	Background_List
YER134C	MATCH	1		S. cerevisiae		537	YER134C	S000000936	ORF	Background_List
YGR175C	MATCH	1	ERG1	S. cerevisiae	ERGosterol biosynthesis	1491	YGR175C	S000003407	ORF	Background_List
YHR112C	MATCH	1		S. cerevisiae		1137	YHR112C	S000001154	ORF	Background_List
YOR201C	MATCH	1	MRM1	S. cerevisiae	Mitochondrial rRNA Methyltransferase	1239	YOR201C	S000005727	ORF	Background_List
YOR116C	MATCH	1	RPO31	S. cerevisiae	RNA POlymerase	4383	YOR116C	S000005642	ORF	Background_List
YMR116C	MATCH	1	ASC1	S. cerevisiae	Absence of growth Suppressor of Cyp1	1233	YMR116C	S000004722	ORF	Background_List
YMR201C	MATCH	1	RAD14	S. cerevisiae	RADiation sensitive	1200	YMR201C	S000004814	ORF	Background_List
YLR397C	MATCH	1	AFG2	S. cerevisiae	ATPase Family Gene	2343	YLR397C	S000004389	ORF	Background_List
YPL131W	MATCH	1	RPL5	S. cerevisiae	Ribosomal Protein of the Large subunit	894	YPL131W	S000006052	ORF	Background_List
YIL133C	MATCH	1	RPL16A	S. cerevisiae	Ribosomal Protein of the Large subunit	890	YIL133C	S000001395	ORF	Background_List
YJR123W	MATCH	1	RPS5	S. cerevisiae	Ribosomal Protein of the Small subunit	678	YJR123W	S000003884	ORF	Background_List
YPL179W	MATCH	1	PPQ1	S. cerevisiae	Protein Phosphatase Q	1650	YPL179W	S000006100	ORF	Background_List
YML093W	MATCH	1	UTP14	S. cerevisiae	U Three Protein	2700	YML093W	S000004558	ORF	Background_List
YHR028C	MATCH	1	DAP2	S. cerevisiae	Dipeptidyl AminoPeptidase	2457	YHR028C	S000001070	ORF	Background_List
YOR332W	MATCH	1	VMA4	S. cerevisiae	Vacuolar Membrane Atpase	702	YOR332W	S000005859	ORF	Background_List
YPL046C	MATCH	1	ELC1	S. cerevisiae	ELongin C	300	YPL046C	S000005967	ORF	Background_List
YER048C	MATCH	1	CAJ1	S. cerevisiae		1176	YER048C	S000000850	ORF	Background_List
YJR124C	MATCH	1		S. cerevisiae		1347	YJR124C	S000003885	ORF	Background_List
YGL211W	MATCH	1	NCS6	S. cerevisiae	Needs Cla4 to Survive	1080	YGL211W	S000003179	ORF	Background_List
YBL003C	MATCH	1	HTA2	S. cerevisiae	Histone h Two A	399	YBL003C	S000000099	ORF	Background_List
YIL048W	MATCH	1	NEO1	S. cerevisiae	NEOmycin-resistance	3456	YIL048W	S000001310	ORF	Background_List
YIL046W	MATCH	1	MET30	S. cerevisiae	METhionine requiring	1923	YIL046W	S000001308	ORF	Background_List
YHR113W	MATCH	1	APE4	S. cerevisiae		1473	YHR113W	S000001155	ORF	Background_List
YBR181C	MATCH	1	RPS6B	S. cerevisiae	Ribosomal Protein of the Small subunit	1063	YBR181C	S000000385	ORF	Background_List
YKL184W	MATCH	1	SPE1	S. cerevisiae	SPErmidine auxotroph	1401	YKL184W	S000001667	ORF	Background_List
YAL060W	MATCH	1	BDH1	S. cerevisiae	Butanediol DeHydrogenase	1149	YAL060W	S000000056	ORF	Background_List
YDR190C	MATCH	1	RVB1	S. cerevisiae	RuVB-like	1392	YDR190C	S000002598	ORF	Background_List
YDL140C	MATCH	1	RPO21	S. cerevisiae	RNA POlymerase	5202	YDL140C	S000002299	ORF	Background_List
YDL055C	MATCH	1	PSA1	S. cerevisiae		1086	YDL055C	S000002213	ORF	Background_List
YER131W	MATCH	1	RPS26B	S. cerevisiae	Ribosomal Protein of the Small subunit	360	YER131W	S000000933	ORF	Background_List
YPL043W	MATCH	1	NOP4	S. cerevisiae	NucleOlar Protein	2058	YPL043W	S000005964	ORF	Background_List
YJL205C	MATCH	1	NCE101	S. cerevisiae	NonClassical Export	305	YJL205C	S000003742	ORF	Background_List
YNL256W	MATCH	1	FOL1	S. cerevisiae	FOLic acid synthesis	2475	YNL256W	S000005200	ORF	Background_List
YLR175W	MATCH	1	CBF5	S. cerevisiae	Centromere Binding Factor	1452	YLR175W	S000004165	ORF	Background_List
YPL260W	MATCH	1	CUB1	S. cerevisiae	Cu2+ suppressing and Bleomycin sensitive	1656	YPL260W	S000006181	ORF	Background_List
YER047C	MATCH	1	SAP1	S. cerevisiae	Sin1 Associated Protein	2694	YER047C	S000000849	ORF	Background_List
YNL123W	MATCH	1	NMA111	S. cerevisiae	Nuclear Mediator of Apoptosis	2994	YNL123W	S000005067	ORF	Background_List
YML096W	MATCH	1		S. cerevisiae		1578	YML096W	S000004562	ORF	Background_List
YBR096W	MATCH	1		S. cerevisiae		693	YBR096W	S000000300	ORF	Background_List
YGL125W	MATCH	1	MET13	S. cerevisiae	METhionine requiring	1803	YGL125W	S000003093	ORF	Background_List
YGL210W	MATCH	1	YPT32	S. cerevisiae	Yeast Protein Two	669	YGL210W	S000003178	ORF	Background_List
YLR262C	MATCH	1	YPT6	S. cerevisiae	Yeast Protein Two	648	YLR262C	S000004252	ORF	Background_List
YJR121W	MATCH	1	ATP2	S. cerevisiae	ATP synthase	1536	YJR121W	S000003882	ORF	Background_List
YNL255C	MATCH	1	GIS2	S. cerevisiae	GIg Suppressor	462	YNL255C	S000005199	ORF	Background_List
YGR173W	MATCH	1	RBG2	S. cerevisiae	RiBosome interacting Gtpase	1107	YGR173W	S000003405	ORF	Background_List
YHR114W	MATCH	1	BZZ1	S. cerevisiae		1902	YHR114W	S000001156	ORF	Background_List
YER178W	MATCH	1	PDA1	S. cerevisiae	Pyruvate Dehydrogenase Alpha	1263	YER178W	S000000980	ORF	Background_List
YPL262W	MATCH	1	FUM1	S. cerevisiae	FUMarase	1467	YPL262W	S000006183	ORF	Background_List
YMR202W	MATCH	1	ERG2	S. cerevisiae	ERGosterol biosynthesis	669	YMR202W	S000004815	ORF	Background_List
YNL037C	MATCH	1	IDH1	S. cerevisiae	Isocitrate DeHydrogenase	1083	YNL037C	S000004982	ORF	Background_List
YGR174C	MATCH	1	CBP4	S. cerevisiae	Cytochrome B mRNA Processing	513	YGR174C	S000003406	ORF	Background_List
YBR097W	MATCH	1	VPS15	S. cerevisiae	Vacuolar Protein Sorting	4365	YBR097W	S000000301	ORF	Background_List
YBL001C	MATCH	1	ECM15	S. cerevisiae	ExtraCellular Mutant	315	YBL001C	S000000097	ORF	Background_List
YOR246C	MATCH	1	ENV9	S. cerevisiae	late ENdosome and Vacuole interface function	993	YOR246C	S000005772	ORF	Background_List
YLR363W-A	MATCH	1		S. cerevisiae		258	YLR363W-A	S000007620	ORF	Background_List
YPR016C	MATCH	1	TIF6	S. cerevisiae	Translation Initiation Factor	738	YPR016C	S000006220	ORF	Background_List
YHL016C	MATCH	1	DUR3	S. cerevisiae	Degradation of URea	2208	YHL016C	S000001008	ORF	Background_List
YOR370C	MATCH	1	MRS6	S. cerevisiae	Mitochondrial RNA Splicing	1812	YOR370C	S000005897	ORF	Background_List
YPR100W	MATCH	1	MRPL51	S. cerevisiae	Mitochondrial Ribosomal Protein, Large subunit	423	YPR100W	S000006304	ORF	Background_List
YMR203W	MATCH	1	TOM40	S. cerevisiae	Translocase of the Outer Mitochondrial membrane	1164	YMR203W	S000004816	ORF	Background_List
YER125W	MATCH	1	RSP5	S. cerevisiae	Reverses Spt- Phenotype	2430	YER125W	S000000927	ORF	Background_List
YHL015W	MATCH	1	RPS20	S. cerevisiae	Ribosomal Protein of the Small subunit	366	YHL015W	S000001007	ORF	Background_List
YKL142W	MATCH	1	MRP8	S. cerevisiae	Mitochondrial Ribosomal Protein	660	YKL142W	S000001625	ORF	Background_List
YNL088W	MATCH	1	TOP2	S. cerevisiae	TOPoisomerase	4287	YNL088W	S000005032	ORF	Background_List
YPR149W	MATCH	1	NCE102	S. cerevisiae	NonClassical Export	522	YPR149W	S000006353	ORF	Background_List
YKL058W	MATCH	1	TOA2	S. cerevisiae		369	YKL058W	S000001541	ORF	Background_List
YPL227C	MATCH	1	ALG5	S. cerevisiae	Asparagine-Linked Glycosylation	1005	YPL227C	S000006148	ORF	Background_List
YOL012C	MATCH	1	HTZ1	S. cerevisiae	Histone Two A Z1	405	YOL012C	S000005372	ORF	Background_List
YGR183C	MATCH	1	QCR9	S. cerevisiae	ubiQuinol-cytochrome C oxidoReductase	414	YGR183C	S000003415	ORF	Background_List
YER126C	MATCH	1	NSA2	S. cerevisiae	Nop Seven Associated	786	YER126C	S000000928	ORF	Background_List
YOR067C	MATCH	1	ALG8	S. cerevisiae	Asparagine-Linked Glycosylation	1734	YOR067C	S000005593	ORF	Background_List
YJL060W	MATCH	1	BNA3	S. cerevisiae	Biosynthesis of Nicotinic Acid	1335	YJL060W	S000003596	ORF	Background_List
YDR152W	MATCH	1	GIR2	S. cerevisiae	Genetically Interacts with Ribosomal genes	798	YDR152W	S000002559	ORF	Background_List
YKL144C	MATCH	1	RPC25	S. cerevisiae	RNA Polymerase C	639	YKL144C	S000001627	ORF	Background_List
YMR205C	MATCH	1	PFK2	S. cerevisiae	PhosphoFructoKinase	2880	YMR205C	S000004818	ORF	Background_List
YKL059C	MATCH	1	MPE1	S. cerevisiae	Mutant PCF11 Extragenic suppressor	1326	YKL059C	S000001542	ORF	Background_List
YOL146W	MATCH	1	PSF3	S. cerevisiae	Partner of Sld Five	585	YOL146W	S000005506	ORF	Background_List
YOR151C	MATCH	1	RPB2	S. cerevisiae	RNA Polymerase B	3675	YOR151C	S000005677	ORF	Background_List
YHR023W	MATCH	1	MYO1	S. cerevisiae	MYOsin	5787	YHR023W	S000001065	ORF	Background_List
YBL091C	MATCH	1	MAP2	S. cerevisiae	Methionine AminoPeptidase	1266	YBL091C	S000000187	ORF	Background_List
YLR340W	MATCH	1	RPP0	S. cerevisiae	Ribosomal Protein P0	939	YLR340W	S000004332	ORF	Background_List
YOR283W	MATCH	1		S. cerevisiae		693	YOR283W	S000005809	ORF	Background_List
YOR150W	MATCH	1	MRPL23	S. cerevisiae	Mitochondrial Ribosomal Protein, Large subunit	492	YOR150W	S000005676	ORF	Background_List
YLR388W	MATCH	1	RPS29A	S. cerevisiae	Ribosomal Protein of the Small subunit	171	YLR388W	S000004380	ORF	Background_List
YHR024C	MATCH	1	MAS2	S. cerevisiae	Mitochondrial ASsembly	1449	YHR024C	S000001066	ORF	Background_List
YBR109C	MATCH	1	CMD1	S. cerevisiae	CalMoDulin	444	YBR109C	S000000313	ORF	Background_List
YOR065W	MATCH	1	CYT1	S. cerevisiae	CYTochrome c1	930	YOR065W	S000005591	ORF	Background_List
YDR067C	MATCH	1	OCA6	S. cerevisiae	Oxidant-induced Cell-cycle Arrest	675	YDR067C	S000002474	ORF	Background_List
YLR389C	MATCH	1	STE23	S. cerevisiae	STErile	3084	YLR389C	S000004381	ORF	Background_List
YLR038C	MATCH	1	COX12	S. cerevisiae	Cytochrome c OXidase	252	YLR038C	S000004028	ORF	Background_List
YCL005W-A	MATCH	1	VMA9	S. cerevisiae	Vacuolar Membrane Atpase	395	YCL005W-A	S000028508	ORF	Background_List
YDR021W	MATCH	1	FAL1	S. cerevisiae	eukaryotic translation initiation factor Four A Like	1200	YDR021W	S000002428	ORF	Background_List
YGR271C-A	MATCH	1	EFG1	S. cerevisiae	Exit From G1	702	YGR271C-A	S000007608	ORF	Background_List
YPL225W	MATCH	1		S. cerevisiae		441	YPL225W	S000006146	ORF	Background_List
YLR120C	MATCH	1	YPS1	S. cerevisiae	YaPSin	1710	YLR120C	S000004110	ORF	Background_List
YKL056C	MATCH	1	TMA19	S. cerevisiae	Translation Machinery Associated	504	YKL056C	S000001539	ORF	Background_List
YDL144C	MATCH	1		S. cerevisiae		1071	YDL144C	S000002303	ORF	Background_List
YJL062W	MATCH	1	LAS21	S. cerevisiae	Local Anestheticum Sensitive	2493	YJL062W	S000003598	ORF	Background_List
YOR197W	MATCH	1	MCA1	S. cerevisiae	MetaCAspase	1299	YOR197W	S000005723	ORF	Background_List
YLR167W	MATCH	1	RPS31	S. cerevisiae	Ribosomal Protein of the Small subunit	459	YLR167W	S000004157	ORF	Background_List
YDL143W	MATCH	1	CCT4	S. cerevisiae	Chaperonin Containing TCP-1	1587	YDL143W	S000002302	ORF	Background_List
YPR103W	MATCH	1	PRE2	S. cerevisiae	PRoteinase yscE	864	YPR103W	S000006307	ORF	Background_List
YDR155C	MATCH	1	CPR1	S. cerevisiae	Cyclosporin A-sensitive Proline Rotamase	489	YDR155C	S000002562	ORF	Background_List
YLR168C	MATCH	1	UPS2	S. cerevisiae	UnProceSsed	693	YLR168C	S000004158	ORF	Background_List
YDL058W	MATCH	1	USO1	S. cerevisiae	yUSOu - transport in Japanese	5373	YDL058W	S000002216	ORF	Background_List
YPL226W	MATCH	1	NEW1	S. cerevisiae	Nu+	3591	YPL226W	S000006147	ORF	Background_List
YGR096W	MATCH	1	TPC1	S. cerevisiae	Thiamine Pyrophosphate Carrier	945	YGR096W	S000003328	ORF	Background_List
YLR387C	MATCH	1	REH1	S. cerevisiae	REI1 Homolog	1299	YLR387C	S000004379	ORF	Background_List
YHR025W	MATCH	1	THR1	S. cerevisiae	THReonine requiring	1074	YHR025W	S000001067	ORF	Background_List
YML092C	MATCH	1	PRE8	S. cerevisiae	PRoteinase yscE	753	YML092C	S000004557	ORF	Background_List
YPL008W	MATCH	1	CHL1	S. cerevisiae	CHromosome Loss	2586	YPL008W	S000005929	ORF	Background_List
YDL145C	MATCH	1	COP1	S. cerevisiae	COat Protein	3606	YDL145C	S000002304	ORF	Background_List
YHR110W	MATCH	1	ERP5	S. cerevisiae	Emp24p/Erv25p Related Protein	639	YHR110W	S000001152	ORF	Background_List
YPL009C	MATCH	1	RQC2	S. cerevisiae	Ribosome Quality control Complex	3117	YPL009C	S000005930	ORF	Background_List
YGL173C	MATCH	1	XRN1	S. cerevisiae	eXoRiboNuclease	4587	YGL173C	S000003141	ORF	Background_List
YBR106W	MATCH	1	SND3	S. cerevisiae	SRP-iNDependent targeting	567	YBR106W	S000000310	ORF	Background_List
YGL040C	MATCH	1	HEM2	S. cerevisiae	HEMe biosynthesis	1029	YGL040C	S000003008	ORF	Background_List
YKR066C	MATCH	1	CCP1	S. cerevisiae	Cytochrome c Peroxidase	1086	YKR066C	S000001774	ORF	Background_List
YLR386W	MATCH	1	VAC14	S. cerevisiae	VACuole morphology and inheritance mutant	2643	YLR386W	S000004378	ORF	Background_List
YLR253W	MATCH	1	MCP2	S. cerevisiae	Mdm10 Complementing Protein	1710	YLR253W	S000004243	ORF	Background_List
YDR372C	MATCH	1	VPS74	S. cerevisiae	Vacuolar Protein Sorting	1038	YDR372C	S000002780	ORF	Background_List
YOR063W	MATCH	1	RPL3	S. cerevisiae	Ribosomal Protein of the Large subunit	1164	YOR063W	S000005589	ORF	Background_List
YGR181W	MATCH	1	TIM13	S. cerevisiae	Translocase of the Inner Mitochondrial membrane	318	YGR181W	S000003413	ORF	Background_List
YJL190C	MATCH	1	RPS22A	S. cerevisiae	Ribosomal Protein of the Small subunit	393	YJL190C	S000003726	ORF	Background_List
YNL177C	MATCH	1	MRPL22	S. cerevisiae	Mitochondrial Ribosomal Protein, Large subunit	930	YNL177C	S000005121	ORF	Background_List
YHR066W	MATCH	1	SSF1	S. cerevisiae	Suppressor of ste4 (Four)	1362	YHR066W	S000001108	ORF	Background_List
YKR060W	MATCH	1	UTP30	S. cerevisiae	U Three Protein	825	YKR060W	S000001768	ORF	Background_List
YLR210W	MATCH	1	CLB4	S. cerevisiae	CycLin B	1383	YLR210W	S000004200	ORF	Background_List
YMR208W	MATCH	1	ERG12	S. cerevisiae	ERGosterol biosynthesis	1332	YMR208W	S000004821	ORF	Background_List
YLR258W	MATCH	1	GSY2	S. cerevisiae	Glycogen SYnthase	2118	YLR258W	S000004248	ORF	Background_List
YNL044W	MATCH	1	YIP3	S. cerevisiae	Ypt-Interacting Protein	610	YNL044W	S000004989	ORF	Background_List
YDL149W	MATCH	1	ATG9	S. cerevisiae	AuTophaGy related	2994	YDL149W	S000002308	ORF	Background_List
YLR259C	MATCH	1	HSP60	S. cerevisiae	Heat Shock Protein	1719	YLR259C	S000004249	ORF	Background_List
YOL016C	MATCH	1	CMK2	S. cerevisiae	CalModulin dependent protein Kinase	1344	YOL016C	S000005376	ORF	Background_List
YDR063W	MATCH	1	AIM7	S. cerevisiae	Altered Inheritance rate of Mitochondria	450	YDR063W	S000002470	ORF	Background_List
YKL148C	MATCH	1	SDH1	S. cerevisiae	Succinate DeHydrogenase	1923	YKL148C	S000001631	ORF	Background_List
YPL006W	MATCH	1	NCR1	S. cerevisiae	Niemann-pick type C Related	3513	YPL006W	S000005927	ORF	Background_List
YDL103C	MATCH	1	QRI1	S. cerevisiae		1434	YDL103C	S000002261	ORF	Background_List
YPR019W	MATCH	1	MCM4	S. cerevisiae	MiniChromosome Maintenance	2802	YPR019W	S000006223	ORF	Background_List
YDR196C	MATCH	1	CAB5	S. cerevisiae		726	YDR196C	S000002604	ORF	Background_List
YLR344W	MATCH	1	RPL26A	S. cerevisiae	Ribosomal Protein of the Large subunit	831	YLR344W	S000004336	ORF	Background_List
YGR095C	MATCH	1	RRP46	S. cerevisiae	Ribosomal RNA Processing	672	YGR095C	S000003327	ORF	Background_List
YOR288C	MATCH	1	MPD1	S. cerevisiae	Multicopy suppressor of PDI1 deletion	957	YOR288C	S000005814	ORF	Background_List
YLR212C	MATCH	1	TUB4	S. cerevisiae	TUBulin	1422	YLR212C	S000004202	ORF	Background_List
YOR155C	MATCH	1	ISN1	S. cerevisiae	IMP-Specific 5'-Nucleotidase	1353	YOR155C	S000005681	ORF	Background_List
YDR280W	MATCH	1	RRP45	S. cerevisiae	Ribosomal RNA Processing	918	YDR280W	S000002688	ORF	Background_List
YDR062W	MATCH	1	LCB2	S. cerevisiae	Long-Chain Base	1686	YDR062W	S000002469	ORF	Background_List
YGR094W	MATCH	1	VAS1	S. cerevisiae	VAlyl-tRNA Synthetase	3315	YGR094W	S000003326	ORF	Background_List
YDL102W	MATCH	1	POL3	S. cerevisiae	POLymerase	3294	YDL102W	S000002260	ORF	Background_List
YGL130W	MATCH	1	CEG1	S. cerevisiae	Capping Enzyme Guanylyltransferase	1380	YGL130W	S000003098	ORF	Background_List
YNL175C	MATCH	1	NOP13	S. cerevisiae	NucleOlar Protein	1212	YNL175C	S000005119	ORF	Background_List
YOR021C	MATCH	1	SFM1	S. cerevisiae	Spout Family Methyltransferase 1	642	YOR021C	S000005547	ORF	Background_List
YER127W	MATCH	1	LCP5	S. cerevisiae	Lethal with Conditional Pap1	1074	YER127W	S000000929	ORF	Background_List
YOL103W	MATCH	1	ITR2	S. cerevisiae	myo-Inositol TRansporter	1830	YOL103W	S000005463	ORF	Background_List
YDL100C	MATCH	1	GET3	S. cerevisiae	Guided Entry of Tail-anchored proteins	1065	YDL100C	S000002258	ORF	Background_List
YHR068W	MATCH	1	DYS1	S. cerevisiae	DeoxyhYpusine Synthase	1164	YHR068W	S000001110	ORF	Background_List
YIL007C	MATCH	1	NAS2	S. cerevisiae	Non-ATPase Subunit	663	YIL007C	S000001269	ORF	Background_List
YKR062W	MATCH	1	TFA2	S. cerevisiae	Transcription Factor a, subunit 2	987	YKR062W	S000001770	ORF	Background_List
YHR020W	MATCH	1		S. cerevisiae		2067	YHR020W	S000001062	ORF	Background_List
YPL221W	MATCH	1	FLC1	S. cerevisiae	FLavin Carrier	2382	YPL221W	S000006142	ORF	Background_List
YOR153W	MATCH	1	PDR5	S. cerevisiae	Pleiotropic Drug Resistance	4536	YOR153W	S000005679	ORF	Background_List
YHR069C	MATCH	1	RRP4	S. cerevisiae	Ribosomal RNA Processing	1080	YHR069C	S000001111	ORF	Background_List
YKL145W	MATCH	1	RPT1	S. cerevisiae	Regulatory Particle Triple-A protein, or Regulatory Particle Triphosphatase	1404	YKL145W	S000001628	ORF	Background_List
YDR284C	MATCH	1	DPP1	S. cerevisiae	Diacylglycerol Pyrophosphate Phosphatase	870	YDR284C	S000002692	ORF	Background_List
YDL148C	MATCH	1	NOP14	S. cerevisiae	NucleOlar Protein	2433	YDL148C	S000002307	ORF	Background_List
YHR021C	MATCH	1	RPS27B	S. cerevisiae	Ribosomal Protein of the Small subunit	799	YHR021C	S000001063	ORF	Background_List
YDL014W	MATCH	1	NOP1	S. cerevisiae	NucleOlar Protein	984	YDL014W	S000002172	ORF	Background_List
YDL147W	MATCH	1	RPN5	S. cerevisiae	Regulatory Particle Non-ATPase	1338	YDL147W	S000002306	ORF	Background_List
YKL013C	MATCH	1	ARC19	S. cerevisiae	ARp2/3 Complex subunit	516	YKL013C	S000001496	ORF	Background_List
YOR020C	MATCH	1	HSP10	S. cerevisiae	Heat Shock Protein	321	YOR020C	S000005546	ORF	Background_List
YNL040W	MATCH	1		S. cerevisiae		1371	YNL040W	S000004985	ORF	Background_List
YJR117W	MATCH	1	STE24	S. cerevisiae	STErile	1362	YJR117W	S000003878	ORF	Background_List
YDL234C	MATCH	1	GYP7	S. cerevisiae	Gtpase-activating protein for Ypt7 Protein	2241	YDL234C	S000002393	ORF	Background_List
YPL222W	MATCH	1	FMP40	S. cerevisiae	Found in Mitochondrial Proteome	2067	YPL222W	S000006143	ORF	Background_List
YDR283C	MATCH	1	GCN2	S. cerevisiae	General Control Nonderepressible	4980	YDR283C	S000002691	ORF	Background_List
YLR342W	MATCH	1	FKS1	S. cerevisiae	FK506 Sensitivity	5631	YLR342W	S000004334	ORF	Background_List
YIL006W	MATCH	1	YIA6	S. cerevisiae		1122	YIL006W	S000001268	ORF	Background_List
YDR064W	MATCH	1	RPS13	S. cerevisiae	Ribosomal Protein of the Small subunit	995	YDR064W	S000002471	ORF	Background_List
YGR092W	MATCH	1	DBF2	S. cerevisiae	DumbBell Former	1719	YGR092W	S000003324	ORF	Background_List
YGL043W	MATCH	1	DST1	S. cerevisiae	DNA Strand Transfer	930	YGL043W	S000003011	ORF	Background_List
YJR075W	MATCH	1	HOC1	S. cerevisiae	Homologous to OCh1	1191	YJR075W	S000003836	ORF	Background_List
YOR192C	MATCH	1	THI72	S. cerevisiae	THI7 homolog 2	1800	YOR192C	S000005718	ORF	Background_List
YDR330W	MATCH	1	UBX5	S. cerevisiae	UBiquitin regulatory X	1503	YDR330W	S000002738	ORF	Background_List
YCR031C	MATCH	1	RPS14A	S. cerevisiae	Ribosomal Protein of the Small subunit	721	YCR031C	S000000627	ORF	Background_List
YDR245W	MATCH	1	MNN10	S. cerevisiae	MaNNosyltransferase	1182	YDR245W	S000002653	ORF	Background_List
YBR147W	MATCH	1	RTC2	S. cerevisiae	Restriction of Telomere Capping	891	YBR147W	S000000351	ORF	Background_List
YNL307C	MATCH	1	MCK1	S. cerevisiae	Meiosis and Centromere regulatory Kinase	1128	YNL307C	S000005251	ORF	Background_List
YPR140W	MATCH	1	TAZ1	S. cerevisiae	TAfaZzin	1146	YPR140W	S000006344	ORF	Background_List
YOL052C	MATCH	1	SPE2	S. cerevisiae	SPErmidine auxotroph	1191	YOL052C	S000005412	ORF	Background_List
YNL308C	MATCH	1	KRI1	S. cerevisiae	KRR1-Interacting protein	1776	YNL308C	S000005252	ORF	Background_List
YLR433C	MATCH	1	CNA1	S. cerevisiae	CalciNeurin A	1662	YLR433C	S000004425	ORF	Background_List
YPR141C	MATCH	1	KAR3	S. cerevisiae	KARyogamy	2190	YPR141C	S000006345	ORF	Background_List
YHR063C	MATCH	1	PAN5	S. cerevisiae	PANtothenate biosynthesis	1140	YHR063C	S000001105	ORF	Background_List
YJL154C	MATCH	1	VPS35	S. cerevisiae	Vacuolar Protein Sorting	2835	YJL154C	S000003690	ORF	Background_List
YLR215C	MATCH	1	CDC123	S. cerevisiae	Cell Division Cycle	1083	YLR215C	S000004205	ORF	Background_List
YBL099W	MATCH	1	ATP1	S. cerevisiae	ATP synthase	1638	YBL099W	S000000195	ORF	Background_List
YJL069C	MATCH	1	UTP18	S. cerevisiae	U Three Protein	1785	YJL069C	S000003605	ORF	Background_List
YLR348C	MATCH	1	DIC1	S. cerevisiae	DIcarboxylate Carrier	897	YLR348C	S000004340	ORF	Background_List
YJR076C	MATCH	1	CDC11	S. cerevisiae	Cell Division Cycle	1248	YJR076C	S000003837	ORF	Background_List
YAL010C	MATCH	1	MDM10	S. cerevisiae	Mitochondrial Distribution and Morphology	1482	YAL010C	S000000008	ORF	Background_List
YDR244W	MATCH	1	PEX5	S. cerevisiae	PEroXin	1839	YDR244W	S000002652	ORF	Background_List
YKL104C	MATCH	1	GFA1	S. cerevisiae	Glutamine:Fructose-6-phosphate Amidotransferase	2154	YKL104C	S000001587	ORF	Background_List
YDR377W	MATCH	1	ATP17	S. cerevisiae	ATP synthase	306	YDR377W	S000002785	ORF	Background_List
YKR023W	MATCH	1	RQT4	S. cerevisiae	Ribosome-Quality control Trigger factor	1593	YKR023W	S000001731	ORF	Background_List
YPR187W	MATCH	1	RPO26	S. cerevisiae	RNA POlymerase	544	YPR187W	S000006391	ORF	Background_List
YPR054W	MATCH	1	SMK1	S. cerevisiae		1167	YPR054W	S000006258	ORF	Background_List
YIL096C	MATCH	1	BMT5	S. cerevisiae	Base Methyltransferase of Twenty five S rRNA 5	1011	YIL096C	S000001358	ORF	Background_List
YKR024C	MATCH	1	DBP7	S. cerevisiae	Dead Box Protein	2229	YKR024C	S000001732	ORF	Background_List
YPL093W	MATCH	1	NOG1	S. cerevisiae	NucleOlar G-protein	1944	YPL093W	S000006014	ORF	Background_List
YLR300W	MATCH	1	EXG1	S. cerevisiae	EXo-1,3-beta-Glucanase	1347	YLR300W	S000004291	ORF	Background_List
YGR090W	MATCH	1	UTP22	S. cerevisiae	U Three Protein	3714	YGR090W	S000003322	ORF	Background_List
YDR378C	MATCH	1	LSM6	S. cerevisiae	Like SM	261	YDR378C	S000002786	ORF	Background_List
YHR064C	MATCH	1	SSZ1	S. cerevisiae		1617	YHR064C	S000001106	ORF	Background_List
YJL155C	MATCH	1	FBP26	S. cerevisiae	Fructose BisPhosphatase	1359	YJL155C	S000003691	ORF	Background_List
YBL098W	MATCH	1	BNA4	S. cerevisiae	Biosynthesis of Nicotinic Acid	1383	YBL098W	S000000194	ORF	Background_List
YBR234C	MATCH	1	ARC40	S. cerevisiae	ARp2/3 Complex subunit	1155	YBR234C	S000000438	ORF	Background_List
YMR071C	MATCH	1	TVP18	S. cerevisiae	Tlg2-Vesicle Protein	504	YMR071C	S000004675	ORF	Background_List
YNL306W	MATCH	1	MRPS18	S. cerevisiae	Mitochondrial Ribosomal Protein, Small subunit	654	YNL306W	S000005250	ORF	Background_List
YPL094C	MATCH	1	SEC62	S. cerevisiae	SECretory	825	YPL094C	S000006015	ORF	Background_List
YBR101C	MATCH	1	FES1	S. cerevisiae	Factor Exchange for Ssa1p	873	YBR101C	S000000305	ORF	Background_List
YDR462W	MATCH	1	MRPL28	S. cerevisiae	Mitochondrial Ribosomal Protein, Large subunit	444	YDR462W	S000002870	ORF	Background_List
YOR190W	MATCH	1	SPR1	S. cerevisiae	SPorulation Regulated	1338	YOR190W	S000005716	ORF	Background_List
YBL050W	MATCH	1	SEC17	S. cerevisiae	SECretory	995	YBL050W	S000000146	ORF	Background_List
YKL016C	MATCH	1	ATP7	S. cerevisiae	ATP synthase	525	YKL016C	S000001499	ORF	Background_List
YPR010C	MATCH	1	RPA135	S. cerevisiae	RNA Polymerase A	3612	YPR010C	S000006214	ORF	Background_List
YIL156W-B	MATCH	1	MCO8	S. cerevisiae	Mitochondrial Class One protein of 8 kDa	284	YIL156W-B	S000028511	ORF	Background_List
YKL149C	MATCH	1	DBR1	S. cerevisiae	DeBRanching	1218	YKL149C	S000001632	ORF	Background_List
YMR290C	MATCH	1	HAS1	S. cerevisiae	Helicase Associated with Set1	1518	YMR290C	S000004903	ORF	Background_List
YLR345W	MATCH	1		S. cerevisiae		1530	YLR345W	S000004337	ORF	Background_List
YDL019C	MATCH	1	OSH2	S. cerevisiae	OxySterol binding protein Homolog	3852	YDL019C	S000002177	ORF	Background_List
YDL104C	MATCH	1	QRI7	S. cerevisiae		1224	YDL104C	S000002262	ORF	Background_List
YGL080W	MATCH	1	MPC1	S. cerevisiae	Mitochondrial Pyruvate Carrier	393	YGL080W	S000003048	ORF	Background_List
YHR065C	MATCH	1	RRP3	S. cerevisiae	Ribosomal RNA Processing	1506	YHR065C	S000001107	ORF	Background_List
YML009C	MATCH	1	MRPL39	S. cerevisiae	Mitochondrial Ribosomal Protein, Large subunit	213	YML009C	S000004468	ORF	Background_List
YDR333C	MATCH	1	RQC1	S. cerevisiae	Ribosome Quality Control	2172	YDR333C	S000002741	ORF	Background_List
YBR231C	MATCH	1	SWC5	S. cerevisiae	SWr Complex	912	YBR231C	S000000435	ORF	Background_List
YDL236W	MATCH	1	PHO13	S. cerevisiae	PHOsphate metabolism	939	YDL236W	S000002395	ORF	Background_List
YDR248C	MATCH	1		S. cerevisiae		582	YDR248C	S000002656	ORF	Background_List
YIR012W	MATCH	1	SQT1	S. cerevisiae	Suppressor of QSR1 Truncations	1296	YIR012W	S000001451	ORF	Background_List
YDR331W	MATCH	1	GPI8	S. cerevisiae	GlycosylPhosphatidylInositol anchor biosynthesis	1236	YDR331W	S000002739	ORF	Background_List
YDR465C	MATCH	1	RMT2	S. cerevisiae	aRginine MeThyltransferase	1239	YDR465C	S000002873	ORF	Background_List
YBR146W	MATCH	1	MRPS9	S. cerevisiae	Mitochondrial Ribosomal Protein, Small subunit	837	YBR146W	S000000350	ORF	Background_List
YPR056W	MATCH	1	TFB4	S. cerevisiae	Transcription Factor B subunit 4	1017	YPR056W	S000006260	ORF	Background_List
YLR129W	MATCH	1	DIP2	S. cerevisiae	DOM34 Interacting Protein	2832	YLR129W	S000004119	ORF	Background_List
YKL017C	MATCH	1	HCS1	S. cerevisiae	dna HeliCaSe	2052	YKL017C	S000001500	ORF	Background_List
YKR026C	MATCH	1	GCN3	S. cerevisiae	General Control Nonderepressible	918	YKR026C	S000001734	ORF	Background_List
YJR073C	MATCH	1	OPI3	S. cerevisiae	OverProducer of Inositol	621	YJR073C	S000003834	ORF	Background_List
YML008C	MATCH	1	ERG6	S. cerevisiae	ERGosterol biosynthesis	1152	YML008C	S000004467	ORF	Background_List
YIL094C	MATCH	1	LYS12	S. cerevisiae	LYSine requiring	1116	YIL094C	S000001356	ORF	Background_List
YPL091W	MATCH	1	GLR1	S. cerevisiae	GLutathione Reductase	1452	YPL091W	S000006012	ORF	Background_List
YDL238C	MATCH	1	GUD1	S. cerevisiae	GUanine Deaminase	1470	YDL238C	S000002397	ORF	Background_List
YJL024C	MATCH	1	APS3	S. cerevisiae	clathrin Associated Protein complex Small subunit	662	YJL024C	S000003561	ORF	Background_List
YLR347C	MATCH	1	KAP95	S. cerevisiae	KAryoPherin	2586	YLR347C	S000004339	ORF	Background_List
YOR281C	MATCH	1	PLP2	S. cerevisiae	Phosducin-Like Protein	861	YOR281C	S000005807	ORF	Background_List
YDR023W	MATCH	1	SES1	S. cerevisiae	SEryl-tRNA Synthetase	1389	YDR023W	S000002430	ORF	Background_List
YNL084C	MATCH	1	END3	S. cerevisiae	ENDocytosis defective	1050	YNL084C	S000005028	ORF	Background_List
YCR075C	MATCH	1	ERS1	S. cerevisiae	ERd Suppressor	783	YCR075C	S000000671	ORF	Background_List
YOR196C	MATCH	1	LIP5	S. cerevisiae	LIPoic acid	1245	YOR196C	S000005722	ORF	Background_List
YBR103W	MATCH	1	SIF2	S. cerevisiae	Sir4p-Interacting Factor	1608	YBR103W	S000000307	ORF	Background_List
YNL083W	MATCH	1	SAL1	S. cerevisiae	Suppressor of Aac2 Lethality	1485	YNL083W	S000005027	ORF	Background_List
YGL087C	MATCH	1	MMS2	S. cerevisiae	Methyl MethaneSulfonate sensitivity	499	YGL087C	S000003055	ORF	Background_List
YBR019C	MATCH	1	GAL10	S. cerevisiae	GALactose metabolism	2100	YBR019C	S000000223	ORF	Background_List
YJR072C	MATCH	1	NPA3	S. cerevisiae	Nucleolar Preribosomal Associated	1158	YJR072C	S000003833	ORF	Background_List
YGL171W	MATCH	1	ROK1	S. cerevisiae	Rescuer Of Kem1	1695	YGL171W	S000003139	ORF	Background_List
YLR303W	MATCH	1	MET17	S. cerevisiae	METhionine requiring	1335	YLR303W	S000004294	ORF	Background_List
YDR375C	MATCH	1	BCS1	S. cerevisiae	ubiquinol-cytochrome c reductase (bc1) Synthesis	1371	YDR375C	S000002783	ORF	Background_List
YIL093C	MATCH	1	RSM25	S. cerevisiae	Ribosomal Small subunit of Mitochondria	795	YIL093C	S000001355	ORF	Background_List
YLR304C	MATCH	1	ACO1	S. cerevisiae	ACOnitase	2337	YLR304C	S000004295	ORF	Background_List
YMR074C	MATCH	1	SDD2	S. cerevisiae	Suppressor of Degenerative Death	438	YMR074C	S000004678	ORF	Background_List
YOL140W	MATCH	1	ARG8	S. cerevisiae	ARGinine requiring	1272	YOL140W	S000005500	ORF	Background_List
YMR292W	MATCH	1	GOT1	S. cerevisiae	GOlgi Transport	499	YMR292W	S000004906	ORF	Background_List
YDR373W	MATCH	1	FRQ1	S. cerevisiae	FReQuenin homolog	573	YDR373W	S000002781	ORF	Background_List
YOL142W	MATCH	1	RRP40	S. cerevisiae	Ribosomal RNA Processing	723	YOL142W	S000005502	ORF	Background_List
YOR280C	MATCH	1	FSH3	S. cerevisiae	Family of Serine Hydrolases	801	YOR280C	S000005806	ORF	Background_List
YOL057W	MATCH	1		S. cerevisiae		2136	YOL057W	S000005418	ORF	Background_List
YPR144C	MATCH	1	NOC4	S. cerevisiae	NucleOlar Complex associated	1659	YPR144C	S000006348	ORF	Background_List
YKR067W	MATCH	1	GPT2	S. cerevisiae	Glycerol-3-Phosphate acylTransferase	2232	YKR067W	S000001775	ORF	Background_List
YPR011C	MATCH	1		S. cerevisiae		981	YPR011C	S000006215	ORF	Background_List
YPR143W	MATCH	1	RRP15	S. cerevisiae	Ribosomal RNA Processing	753	YPR143W	S000006347	ORF	Background_List
YLR438W	MATCH	1	CAR2	S. cerevisiae	Catabolism of ARginine	1275	YLR438W	S000004430	ORF	Background_List
YDR379C-A	MATCH	1	SDH6	S. cerevisiae		240	YDR379C-A	S000007605	ORF	Background_List
YNL082W	MATCH	1	PMS1	S. cerevisiae	PostMeiotic Segregation	2622	YNL082W	S000005026	ORF	Background_List
YBR104W	MATCH	1	YMC2	S. cerevisiae	Yeast Mitochondrial Carrier	990	YBR104W	S000000308	ORF	Background_List
YGL085W	MATCH	1	LCL3	S. cerevisiae	Long Chronological Lifespan 3	825	YGL085W	S000003053	ORF	Background_List
YKR068C	MATCH	1	BET3	S. cerevisiae	Blocked Early in Transport	582	YKR068C	S000001776	ORF	Background_List
YHR193C	MATCH	1	EGD2	S. cerevisiae	Enhancer of Gal4 DNA binding	525	YHR193C	S000001236	ORF	Background_List
YOR061W	MATCH	1	CKA2	S. cerevisiae	Casein Kinase Alpha' subunit	1020	YOR061W	S000005587	ORF	Background_List
YLR305C	MATCH	1	STT4	S. cerevisiae	STaurosporine and Temperature sensitive	5703	YLR305C	S000004296	ORF	Background_List
YFL008W	MATCH	1	SMC1	S. cerevisiae	Stability of MiniChromosomes	3678	YFL008W	S000001886	ORF	Background_List
YHL011C	MATCH	1	PRS3	S. cerevisiae	PhosphoRibosylpyrophosphate Synthetase	963	YHL011C	S000001003	ORF	Background_List
YPR170W-B	MATCH	1		S. cerevisiae		357	YPR170W-B	S000028515	ORF	Background_List
YMR293C	MATCH	1	HER2	S. cerevisiae	Hmg2p ER Remodeling	1395	YMR293C	S000004907	ORF	Background_List
YOL010W	MATCH	1	RCL1	S. cerevisiae	Rna 3'-terminal phosphate Cyclase Like	1104	YOL010W	S000005370	ORF	Background_List
YHL014C	MATCH	1	YLF2	S. cerevisiae		1218	YHL014C	S000001006	ORF	Background_List
YNR008W	MATCH	1	LRO1	S. cerevisiae	Lecithin cholesterol acyl transferase Related Open reading frame	1986	YNR008W	S000005291	ORF	Background_List
YDR158W	MATCH	1	HOM2	S. cerevisiae	HOMoserine requiring	1098	YDR158W	S000002565	ORF	Background_List
YOL058W	MATCH	1	ARG1	S. cerevisiae	ARGinine requiring	1263	YOL058W	S000005419	ORF	Background_List
YDL108W	MATCH	1	KIN28	S. cerevisiae	protein KINase	1002	YDL108W	S000002266	ORF	Background_List
YOR194C	MATCH	1	TOA1	S. cerevisiae		861	YOR194C	S000005720	ORF	Background_List
YFR031C	MATCH	1	SMC2	S. cerevisiae	Structural Maintenance of Chromosomes	3513	YFR031C	S000001927	ORF	Background_List
YHR143W-A	MATCH	1	RPC10	S. cerevisiae	RNA Polymerase C	213	YHR143W-A	S000001185	ORF	Background_List
YBR149W	MATCH	1	ARA1	S. cerevisiae	D-ARAbinose dehydrogenase	1035	YBR149W	S000000353	ORF	Background_List
YJR070C	MATCH	1	LIA1	S. cerevisiae	Ligand of eIF5A	978	YJR070C	S000003831	ORF	Background_List
YBR017C	MATCH	1	KAP104	S. cerevisiae	KAryoPherin	2757	YBR017C	S000000221	ORF	Background_List
YER019C-A	MATCH	1	SBH2	S. cerevisiae	Sec61 beta homolog 2	267	YER019C-A	S000002127	ORF	Background_List
YOL143C	MATCH	1	RIB4	S. cerevisiae	RIBoflavin biosynthesis	510	YOL143C	S000005503	ORF	Background_List
YFR030W	MATCH	1	MET10	S. cerevisiae	METhionine requiring	3108	YFR030W	S000001926	ORF	Background_List
YCR072C	MATCH	1	RSA4	S. cerevisiae	RiboSome Assembly	1548	YCR072C	S000000668	ORF	Background_List
YMR076C	MATCH	1	PDS5	S. cerevisiae	Precocious Dissociation of Sisters	3834	YMR076C	S000004681	ORF	Background_List
YAL016W	MATCH	1	TPD3	S. cerevisiae	tRNA Processing Deficient	1908	YAL016W	S000000014	ORF	Background_List
YDR525W-A	MATCH	1	SNA2	S. cerevisiae	Sensitivity to NA+	240	YDR525W-A	S000007236	ORF	Background_List
YDR460W	MATCH	1	TFB3	S. cerevisiae	Transcription Factor B subunit 3	966	YDR460W	S000002868	ORF	Background_List
YBL092W	MATCH	1	RPL32	S. cerevisiae	Ribosomal Protein of the Large subunit	393	YBL092W	S000000188	ORF	Background_List
YFL005W	MATCH	1	SEC4	S. cerevisiae	SECretory	648	YFL005W	S000001889	ORF	Background_List
YHL013C	MATCH	1	OTU2	S. cerevisiae	member of the Ovarian TUmor family	924	YHL013C	S000001005	ORF	Background_List
YKR069W	MATCH	1	MET1	S. cerevisiae	METhionine requiring	1782	YKR069W	S000001777	ORF	Background_List
YPR145W	MATCH	1	ASN1	S. cerevisiae	ASparagiNe requiring	1719	YPR145W	S000006349	ORF	Background_List
YBR235W	MATCH	1	VHC1	S. cerevisiae	Vacuolar protein Homologous to CCC family	3363	YBR235W	S000000439	ORF	Background_List
YHR194W	MATCH	1	MDM31	S. cerevisiae	Mitochondrial Distribution and Morphology	1740	YHR194W	S000001237	ORF	Background_List
YGL084C	MATCH	1	GUP1	S. cerevisiae	Glycerol UPtake	1683	YGL084C	S000003052	ORF	Background_List
YBR018C	MATCH	1	GAL7	S. cerevisiae	GALactose metabolism	1101	YBR018C	S000000222	ORF	Background_List
YML004C	MATCH	1	GLO1	S. cerevisiae	GLyOxalase	981	YML004C	S000004463	ORF	Background_List
YLR435W	MATCH	1	TSR2	S. cerevisiae	Twenty S rRNA accumulation	618	YLR435W	S000004427	ORF	Background_List
YDR243C	MATCH	1	PRP28	S. cerevisiae	Pre-mRNA Processing	1767	YDR243C	S000002651	ORF	Background_List
YNR007C	MATCH	1	ATG3	S. cerevisiae	AuTophaGy related	933	YNR007C	S000005290	ORF	Background_List
YJL153C	MATCH	1	INO1	S. cerevisiae	INOsitol requiring	1602	YJL153C	S000003689	ORF	Background_List
YMR077C	MATCH	1	VPS20	S. cerevisiae	Vacuolar Protein Sorting	666	YMR077C	S000004682	ORF	Background_List
YCR071C	MATCH	1	IMG2	S. cerevisiae	Integrity of Mitochondrial Genome	441	YCR071C	S000000667	ORF	Background_List
YMR295C	MATCH	1		S. cerevisiae	Ilm1p BInding	594	YMR295C	S000004910	ORF	Background_List
YJL068C	MATCH	1		S. cerevisiae		900	YJL068C	S000003604	ORF	Background_List
YNL081C	MATCH	1	SWS2	S. cerevisiae	Sick Without Securin	432	YNL081C	S000005025	ORF	Background_List
YHR062C	MATCH	1	RPP1	S. cerevisiae	Ribonuclease P Protein	882	YHR062C	S000001104	ORF	Background_List
YMR162C	MATCH	1	DNF3	S. cerevisiae	Drs2 Neo1 Family	4971	YMR162C	S000004772	ORF	Background_List
YPR192W	MATCH	1	AQY1	S. cerevisiae	AQuaporin from Yeast	918	YPR192W	S000006396	ORF	Background_List
YNR038W	MATCH	1	DBP6	S. cerevisiae	Dead Box Protein	1890	YNR038W	S000005321	ORF	Background_List
YDL081C	MATCH	1	RPP1A	S. cerevisiae	Ribosomal Protein P1 Alpha	321	YDL081C	S000002239	ORF	Background_List
YBL011W	MATCH	1	SCT1	S. cerevisiae	Suppressor of Choline-Transport mutants	2280	YBL011W	S000000107	ORF	Background_List
YJL102W	MATCH	1	MEF2	S. cerevisiae	Mitochondrial Elongation Factor	2460	YJL102W	S000003638	ORF	Background_List
YOR326W	MATCH	1	MYO2	S. cerevisiae	MYOsin	4725	YOR326W	S000005853	ORF	Background_List
YBR199W	MATCH	1	KTR4	S. cerevisiae	Kre Two Related	1395	YBR199W	S000000403	ORF	Background_List
YLR405W	MATCH	1	DUS4	S. cerevisiae	DihydroUridine Synthase	1104	YLR405W	S000004397	ORF	Background_List
YMR186W	MATCH	1	HSC82	S. cerevisiae		2118	YMR186W	S000004798	ORF	Background_List
YIL166C	MATCH	1	SOA1	S. cerevisiae	SulfOnAte transport	1629	YIL166C	S000001428	ORF	Background_List
YIL033C	MATCH	1	BCY1	S. cerevisiae	Bypass of CYclic-AMP requirement	1251	YIL033C	S000001295	ORF	Background_List
YFR033C	MATCH	1	QCR6	S. cerevisiae	ubiQuinol-cytochrome C oxidoReductase	444	YFR033C	S000001929	ORF	Background_List
YNL202W	MATCH	1	SPS19	S. cerevisiae	SPorulation-Specific	879	YNL202W	S000005146	ORF	Background_List
YER072W	MATCH	1	VTC1	S. cerevisiae	Vacuolar Transporter Chaperone	390	YER072W	S000000874	ORF	Background_List
YPL270W	MATCH	1	MDL2	S. cerevisiae	MultiDrug resistance-Like	2322	YPL270W	S000006191	ORF	Background_List
YBR151W	MATCH	1	APD1	S. cerevisiae	Actin Patches Distal	951	YBR151W	S000000355	ORF	Background_List
YJR024C	MATCH	1	MDE1	S. cerevisiae	Methylthioribulose-1-phosphate DEhydratase	735	YJR024C	S000003785	ORF	Background_List
YPR060C	MATCH	1	ARO7	S. cerevisiae	AROmatic amino acid requiring	771	YPR060C	S000006264	ORF	Background_List
YNL117W	MATCH	1	MLS1	S. cerevisiae	MaLate Synthase	1665	YNL117W	S000005061	ORF	Background_List
YMR272C	MATCH	1	SCS7	S. cerevisiae	Suppressor of Ca2+ Sensitivity	1155	YMR272C	S000004885	ORF	Background_List
YBR067C	MATCH	1	TIP1	S. cerevisiae	Temperature shock-Inducible Protein	633	YBR067C	S000000271	ORF	Background_List
YCR002C	MATCH	1	CDC10	S. cerevisiae	Cell Division Cycle	969	YCR002C	S000000595	ORF	Background_List
YPR191W	MATCH	1	QCR2	S. cerevisiae	QH2:cytochrome-C oxidoReductase	1107	YPR191W	S000006395	ORF	Background_List
YDR447C	MATCH	1	RPS17B	S. cerevisiae	Ribosomal Protein of the Small subunit	725	YDR447C	S000002855	ORF	Background_List
YML022W	MATCH	1	APT1	S. cerevisiae	Adenine PhosphoribosylTransferase	564	YML022W	S000004484	ORF	Background_List
YGR103W	MATCH	1	NOP7	S. cerevisiae	NucleOlar Protein	1818	YGR103W	S000003335	ORF	Background_List
YLL040C	MATCH	1	VPS13	S. cerevisiae	Vacuolar Protein Sorting	9435	YLL040C	S000003963	ORF	Background_List
YNR037C	MATCH	1	RSM19	S. cerevisiae	Ribosomal Small subunit of Mitochondria	276	YNR037C	S000005320	ORF	Background_List
YBL058W	MATCH	1	SHP1	S. cerevisiae	Suppressor of High-copy PP1	1272	YBL058W	S000000154	ORF	Background_List
YMR055C	MATCH	1	BUB2	S. cerevisiae	Budding Uninhibited by Benzimidazole	921	YMR055C	S000004659	ORF	Background_List
YMR188C	MATCH	1	MRPS17	S. cerevisiae	Mitochondrial Ribosomal Protein, Small subunit	714	YMR188C	S000004800	ORF	Background_List
YDR531W	MATCH	1	CAB1	S. cerevisiae	Coenzyme A Biosynthesis	1104	YDR531W	S000002939	ORF	Background_List
YIL078W	MATCH	1	THS1	S. cerevisiae	THreonyl tRNA Synthetase	2205	YIL078W	S000001340	ORF	Background_List
YNL200C	MATCH	1	NNR1	S. cerevisiae	Nicotinamide Nucleotide Repair	741	YNL200C	S000005144	ORF	Background_List
YGR100W	MATCH	1	MDR1	S. cerevisiae	Mac1-Dependent Regulator	2853	YGR100W	S000003332	ORF	Background_List
YDR316W	MATCH	1	OMS1	S. cerevisiae	OXA1 Multicopy Suppressor	1416	YDR316W	S000002724	ORF	Background_List
YJL104W	MATCH	1	PAM16	S. cerevisiae	Presequence translocase-Associated Motor	450	YJL104W	S000003640	ORF	Background_List
YLL041C	MATCH	1	SDH2	S. cerevisiae	Succinate DeHydrogenase	801	YLL041C	S000003964	ORF	Background_List
YNL248C	MATCH	1	RPA49	S. cerevisiae	RNA Polymerase A	1248	YNL248C	S000005192	ORF	Background_List
YGL009C	MATCH	1	LEU1	S. cerevisiae	LEUcine biosynthesis	2340	YGL009C	S000002977	ORF	Background_List
YOL094C	MATCH	1	RFC4	S. cerevisiae	Replication Factor C	972	YOL094C	S000005454	ORF	Background_List
YBR282W	MATCH	1	MRPL27	S. cerevisiae	Mitochondrial Ribosomal Protein, Large subunit	441	YBR282W	S000000486	ORF	Background_List
YER070W	MATCH	1	RNR1	S. cerevisiae	RiboNucleotide Reductase	2667	YER070W	S000000872	ORF	Background_List
YBR198C	MATCH	1	TAF5	S. cerevisiae	TATA binding protein-Associated Factor	2397	YBR198C	S000000402	ORF	Background_List
YBR283C	MATCH	1	SSH1	S. cerevisiae	Sec Sixty-one Homolog	1473	YBR283C	S000000487	ORF	Background_List
YOL093W	MATCH	1	TRM10	S. cerevisiae	Transfer RNA Methyltransferase	882	YOL093W	S000005453	ORF	Background_List
YML025C	MATCH	1	YML6	S. cerevisiae		960	YML025C	S000004487	ORF	Background_List
YML110C	MATCH	1	COQ5	S. cerevisiae	COenzyme Q	924	YML110C	S000004578	ORF	Background_List
YDR449C	MATCH	1	UTP6	S. cerevisiae	U Three Protein	1323	YDR449C	S000002857	ORF	Background_List
YBL057C	MATCH	1	PTH2	S. cerevisiae	Peptidyl-Trna Hydrolase	627	YBL057C	S000000153	ORF	Background_List
YGR101W	MATCH	1	PCP1	S. cerevisiae	Processing of Cytochrome c Peroxidase	1041	YGR101W	S000003333	ORF	Background_List
YGR234W	MATCH	1	YHB1	S. cerevisiae	Yeast flavoHemogloBin	1200	YGR234W	S000003466	ORF	Background_List
YFL001W	MATCH	1	DEG1	S. cerevisiae	DEpressed Growth rate	1329	YFL001W	S000001895	ORF	Background_List
YGR149W	MATCH	1	GPC1	S. cerevisiae	GlyceroPhosphoCholine acyltransferase	1299	YGR149W	S000003381	ORF	Background_List
YMR189W	MATCH	1	GCV2	S. cerevisiae	GlyCine cleaVage	3105	YMR189W	S000004801	ORF	Background_List
YNL029C	MATCH	1	KTR5	S. cerevisiae	Kre Two Related	1569	YNL029C	S000004974	ORF	Background_List
YJR068W	MATCH	1	RFC2	S. cerevisiae	Replication Factor C	1062	YJR068W	S000003829	ORF	Background_List
YLR319C	MATCH	1	BUD6	S. cerevisiae	BUD site selection	2367	YLR319C	S000004311	ORF	Background_List
YGL008C	MATCH	1	PMA1	S. cerevisiae	Plasma Membrane ATPase	2757	YGL008C	S000002976	ORF	Background_List
YNL247W	MATCH	1	CRS1	S. cerevisiae	Cysteinyl-tRNA Synthetase, CysRS	2304	YNL247W	S000005191	ORF	Background_List
YPL051W	MATCH	1	ARL3	S. cerevisiae	ADP-Ribosylation factor-Like	597	YPL051W	S000005972	ORF	Background_List
YFL002C	MATCH	1	SPB4	S. cerevisiae	Suppressor of PAB1	1821	YFL002C	S000001894	ORF	Background_List
YDR448W	MATCH	1	ADA2	S. cerevisiae	transcriptional ADAptor	1305	YDR448W	S000002856	ORF	Background_List
YGL225W	MATCH	1	VRG4	S. cerevisiae	Vandate Resistance Glycosylation	1014	YGL225W	S000003193	ORF	Background_List
YJR069C	MATCH	1	HAM1	S. cerevisiae	6-n-HydroxylAMinopurine sensitive	594	YJR069C	S000003830	ORF	Background_List
YPR194C	MATCH	1	OPT2	S. cerevisiae	OligoPeptide Transporter	2634	YPR194C	S000006398	ORF	Background_List
YDR400W	MATCH	1	URH1	S. cerevisiae	URidine Hydrolase	1023	YDR400W	S000002808	ORF	Background_List
YOR323C	MATCH	1	PRO2	S. cerevisiae	PROline requiring	1371	YOR323C	S000005850	ORF	Background_List
YJR152W	MATCH	1	DAL5	S. cerevisiae	Degradation of Allantoin	1632	YJR152W	S000003913	ORF	Background_List
YCR047C	MATCH	1	BUD23	S. cerevisiae	BUD site selection	828	YCR047C	S000000643	ORF	Background_List
YGL091C	MATCH	1	NBP35	S. cerevisiae	Nucleotide Binding Protein	987	YGL091C	S000003059	ORF	Background_List
YKL190W	MATCH	1	CNB1	S. cerevisiae	CalciNeurin subunit B	604	YKL190W	S000001673	ORF	Background_List
YEL021W	MATCH	1	URA3	S. cerevisiae	URAcil requiring	804	YEL021W	S000000747	ORF	Background_List
YFL046W	MATCH	1	FMP32	S. cerevisiae	Found in Mitochondrial Proteome	624	YFL046W	S000001848	ORF	Background_List
YDR007W	MATCH	1	TRP1	S. cerevisiae	TRyPtophan	675	YDR007W	S000002414	ORF	Background_List
YBR155W	MATCH	1	CNS1	S. cerevisiae	CyclophiliN Seven suppressor	1158	YBR155W	S000000359	ORF	Background_List
YPL097W	MATCH	1	MSY1	S. cerevisiae	Mitochondrial aminoacyl-tRNA Synthetase, tyrosine (Y)	1479	YPL097W	S000006018	ORF	Background_List
YLR409C	MATCH	1	UTP21	S. cerevisiae	U Three Protein	2820	YLR409C	S000004401	ORF	Background_List
YOL096C	MATCH	1	COQ3	S. cerevisiae	COenzyme Q	939	YOL096C	S000005456	ORF	Background_List
YDL084W	MATCH	1	SUB2	S. cerevisiae	SUppressor of Brr1-1	1341	YDL084W	S000002242	ORF	Background_List
YJL145W	MATCH	1	SFH5	S. cerevisiae	Sec Fourteen Homolog	885	YJL145W	S000003681	ORF	Background_List
YBR241C	MATCH	1		S. cerevisiae		1467	YBR241C	S000000445	ORF	Background_List
YML067C	MATCH	1	ERV41	S. cerevisiae	ER Vesicle	1152	YML067C	S000004532	ORF	Background_List
YBR023C	MATCH	1	CHS3	S. cerevisiae	CHitin Synthase-related	3498	YBR023C	S000000227	ORF	Background_List
YCR046C	MATCH	1	IMG1	S. cerevisiae	Integrity of Mitochondrial Genome	510	YCR046C	S000000642	ORF	Background_List
YAL054C	MATCH	1	ACS1	S. cerevisiae	Acetyl CoA Synthetase	2142	YAL054C	S000000050	ORF	Background_List
YDL171C	MATCH	1	GLT1	S. cerevisiae	GLuTamate synthase	6438	YDL171C	S000002330	ORF	Background_List
YKL191W	MATCH	1	DPH2	S. cerevisiae	DiPHthamide	1605	YKL191W	S000001674	ORF	Background_List
YGR232W	MATCH	1	NAS6	S. cerevisiae	Non-ATPase Subunit 6	687	YGR232W	S000003464	ORF	Background_List
YJL014W	MATCH	1	CCT3	S. cerevisiae	Chaperonin Containing TCP-1	1605	YJL014W	S000003551	ORF	Background_List
YEL022W	MATCH	1	GEA2	S. cerevisiae	Guanine nucleotide Exchange on ARF	4380	YEL022W	S000000748	ORF	Background_List
YMR058W	MATCH	1	FET3	S. cerevisiae	FErrous Transport	1911	YMR058W	S000004662	ORF	Background_List
YMR276W	MATCH	1	DSK2	S. cerevisiae		1122	YMR276W	S000004889	ORF	Background_List
YPR062W	MATCH	1	FCY1	S. cerevisiae	FluoroCYtosine resistance	477	YPR062W	S000006266	ORF	Background_List
YOL097C	MATCH	1	WRS1	S. cerevisiae	W (tryptophan) RS (tRNA synthetase)	1299	YOL097C	S000005457	ORF	Background_List
YAL053W	MATCH	1	FLC2	S. cerevisiae	FLavin Carrier	2352	YAL053W	S000000049	ORF	Background_List
YPL183C	MATCH	1	RTT10	S. cerevisiae	Regulator of Ty1 Transposition	3042	YPL183C	S000006104	ORF	Background_List
YPL098C	MATCH	1	MGR2	S. cerevisiae	Mitochondrial Genome Required	342	YPL098C	S000006019	ORF	Background_List
YNR032W	MATCH	1	PPG1	S. cerevisiae	Protein Phosphatase involved in Glycogen accumulation	1107	YNR032W	S000005315	ORF	Background_List
YPL050C	MATCH	1	MNN9	S. cerevisiae	MaNNosyltransferase	1188	YPL050C	S000005971	ORF	Background_List
YKL192C	MATCH	1	ACP1	S. cerevisiae	Acyl Carrier Protein	378	YKL192C	S000001675	ORF	Background_List
YGR148C	MATCH	1	RPL24B	S. cerevisiae	Ribosomal Protein of the Large subunit	468	YGR148C	S000003380	ORF	Background_List
YDL083C	MATCH	1	RPS16B	S. cerevisiae	Ribosomal Protein of the Small subunit	864	YDL083C	S000002241	ORF	Background_List
YMR145C	MATCH	1	NDE1	S. cerevisiae	NADH Dehydrogenase, External	1683	YMR145C	S000004753	ORF	Background_List
YGR144W	MATCH	1	THI4	S. cerevisiae	THIamine metabolism	981	YGR144W	S000003376	ORF	Background_List
YML069W	MATCH	1	POB3	S. cerevisiae	POl1 Binding	1659	YML069W	S000004534	ORF	Background_List
YLL045C	MATCH	1	RPL8B	S. cerevisiae	Ribosomal Protein of the Large subunit	771	YLL045C	S000003968	ORF	Background_List
YDR009W	MATCH	1	GAL3	S. cerevisiae	GALactose metabolism	1563	YDR009W	S000002416	ORF	Background_List
YFR038W	MATCH	1	IRC5	S. cerevisiae	Increased Recombination Centers	2562	YFR038W	S000001934	ORF	Background_List
YFL045C	MATCH	1	SEC53	S. cerevisiae	SECretory	765	YFL045C	S000001849	ORF	Background_List
YNR036C	MATCH	1	MRPS12	S. cerevisiae	Mitochondrial Ribosomal Protein, Small subunit	462	YNR036C	S000005319	ORF	Background_List
YIL075C	MATCH	1	RPN2	S. cerevisiae	Regulatory Particle Non-ATPase	2838	YIL075C	S000001337	ORF	Background_List
YBR153W	MATCH	1	RIB7	S. cerevisiae	RIBoflavin biosynthesis	735	YBR153W	S000000357	ORF	Background_List
YML081C-A	MATCH	1	ATP18	S. cerevisiae	ATP synthase	180	YML081C-A	S000007247	ORF	Background_List
YOL098C	MATCH	1	SDD3	S. cerevisiae	Suppressor of Degenerative Death	3114	YOL098C	S000005458	ORF	Background_List
YBR286W	MATCH	1	APE3	S. cerevisiae	AminoPEptidase	1614	YBR286W	S000000490	ORF	Background_List
YIL160C	MATCH	1	POT1	S. cerevisiae	Peroxisomal Oxoacyl Thiolase	1254	YIL160C	S000001422	ORF	Background_List
YDL082W	MATCH	1	RPL13A	S. cerevisiae	Ribosomal Protein of the Large subunit	965	YDL082W	S000002240	ORF	Background_List
YML021C	MATCH	1	UNG1	S. cerevisiae	Uracil DNA N-Glycosylase	1080	YML021C	S000004483	ORF	Background_List
YBR154C	MATCH	1	RPB5	S. cerevisiae	RNA Polymerase B	648	YBR154C	S000000358	ORF	Background_List
YJR064W	MATCH	1	CCT5	S. cerevisiae	Chaperonin Containing TCP-1	1689	YJR064W	S000003825	ORF	Background_List
YCR044C	MATCH	1	PER1	S. cerevisiae	protein Processing in the ER	1074	YCR044C	S000000640	ORF	Background_List
YMR146C	MATCH	1	TIF34	S. cerevisiae	Translation Initiation Factor	1044	YMR146C	S000004754	ORF	Background_List
YGR145W	MATCH	1	ENP2	S. cerevisiae	Essential Nuclear Protein	2124	YGR145W	S000003377	ORF	Background_List
YGR012W	MATCH	1	MCY1	S. cerevisiae	putative Mitochondrial CYsteine synthase	1182	YGR012W	S000003244	ORF	Background_List
YDR226W	MATCH	1	ADK1	S. cerevisiae	ADenylate Kinase	669	YDR226W	S000002634	ORF	Background_List
YMR278W	MATCH	1	PRM15	S. cerevisiae	Phospho Ribo Mutase	1869	YMR278W	S000004891	ORF	Background_List
YBR287W	MATCH	1		S. cerevisiae		1284	YBR287W	S000000491	ORF	Background_List
YEL024W	MATCH	1	RIP1	S. cerevisiae	Rieske Iron-sulfur Protein	648	YEL024W	S000000750	ORF	Background_List
YMR230W	MATCH	1	RPS10B	S. cerevisiae	Ribosomal Protein of the Small subunit	728	YMR230W	S000004843	ORF	Background_List
YPL096W	MATCH	1	PNG1	S. cerevisiae	Peptide N-Glycanase	1092	YPL096W	S000006017	ORF	Background_List
YNR035C	MATCH	1	ARC35	S. cerevisiae	ARp2/3 Complex subunit	1029	YNR035C	S000005318	ORF	Background_List
YIL074C	MATCH	1	SER33	S. cerevisiae	SERine requiring	1410	YIL074C	S000001336	ORF	Background_List
YER073W	MATCH	1	ALD5	S. cerevisiae	ALdehyde Dehydrogenase	1563	YER073W	S000000875	ORF	Background_List
YOR327C	MATCH	1	SNC2	S. cerevisiae	Suppressor of the Null allele of CAP	348	YOR327C	S000005854	ORF	Background_List
YLR180W	MATCH	1	SAM1	S. cerevisiae	S-AdenosylMethionine requiring	1149	YLR180W	S000004170	ORF	Background_List
YGR231C	MATCH	1	PHB2	S. cerevisiae	ProHiBitin	933	YGR231C	S000003463	ORF	Background_List
YJL101C	MATCH	1	GSH1	S. cerevisiae	glutathione (GSH)	2037	YJL101C	S000003637	ORF	Background_List
YJR065C	MATCH	1	ARP3	S. cerevisiae	Actin-Related Protein	1350	YJR065C	S000003826	ORF	Background_List
YBL105C	MATCH	1	PKC1	S. cerevisiae	Protein Kinase C	3456	YBL105C	S000000201	ORF	Background_List
YPL231W	MATCH	1	FAS2	S. cerevisiae	Fatty Acid Synthetase	5664	YPL231W	S000006152	ORF	Background_List
YJR116W	MATCH	1	TDA4	S. cerevisiae	Topoisomerase I Damage Affected	840	YJR116W	S000003877	ORF	Background_List
YGL221C	MATCH	1	NIF3	S. cerevisiae	Ngg1p-Interacting Factor	867	YGL221C	S000003189	ORF	Background_List
YDL174C	MATCH	1	DLD1	S. cerevisiae	D-Lactate Dehydrogenase	1764	YDL174C	S000002333	ORF	Background_List
YER165W	MATCH	1	PAB1	S. cerevisiae	Poly(A) Binding protein	1734	YER165W	S000000967	ORF	Background_List
YMR231W	MATCH	1	PEP5	S. cerevisiae	carboxyPEPtidase Y-deficient	3090	YMR231W	S000004844	ORF	Background_List
YOR014W	MATCH	1	RTS1	S. cerevisiae	Rox Three Suppressor	2274	YOR014W	S000005540	ORF	Background_List
YPL013C	MATCH	1	MRPS16	S. cerevisiae	Mitochondrial Ribosomal Protein, Small subunit	366	YPL013C	S000005934	ORF	Background_List
YGL136C	MATCH	1	MRM2	S. cerevisiae	Mitochondrial rRNA Methyl transferase	963	YGL136C	S000003104	ORF	Background_List
YOR232W	MATCH	1	MGE1	S. cerevisiae	Mitochondrial GrpE	687	YOR232W	S000005758	ORF	Background_List
YGL003C	MATCH	1	CDH1	S. cerevisiae	CDC20 Homolog	1701	YGL003C	S000002971	ORF	Background_List
YGL135W	MATCH	1	RPL1B	S. cerevisiae	Ribosomal Protein of the Large subunit	654	YGL135W	S000003103	ORF	Background_List
YGR276C	MATCH	1	RNH70	S. cerevisiae	RNase H	1662	YGR276C	S000003508	ORF	Background_List
YIL126W	MATCH	1	STH1	S. cerevisiae	SNF Two Homolog	4080	YIL126W	S000001388	ORF	Background_List
YLR185W	MATCH	1	RPL37A	S. cerevisiae	Ribosomal Protein of the Large subunit	626	YLR185W	S000004175	ORF	Background_List
YLR270W	MATCH	1	DCS1	S. cerevisiae	DeCapping Scavenger	1053	YLR270W	S000004260	ORF	Background_List
YDR408C	MATCH	1	ADE8	S. cerevisiae	ADEnine requiring	645	YDR408C	S000002816	ORF	Background_List
YLR272C	MATCH	1	YCS4	S. cerevisiae	Yeast Condensin Subunit	3531	YLR272C	S000004262	ORF	Background_List
YNL241C	MATCH	1	ZWF1	S. cerevisiae	ZWischenFerment	1518	YNL241C	S000005185	ORF	Background_List
YHR128W	MATCH	1	FUR1	S. cerevisiae	5-FluoroURidine resistant	651	YHR128W	S000001170	ORF	Background_List
YIL124W	MATCH	1	AYR1	S. cerevisiae	1-AcyldihYdroxyacetone-phosphate Reductase	894	YIL124W	S000001386	ORF	Background_List
YKL196C	MATCH	1	YKT6	S. cerevisiae		603	YKL196C	S000001679	ORF	Background_List
YMR015C	MATCH	1	ERG5	S. cerevisiae	ERGosterol biosynthesis	1617	YMR015C	S000004617	ORF	Background_List
YLL048C	MATCH	1	YBT1	S. cerevisiae	Yeast Bile Transporter	4986	YLL048C	S000003971	ORF	Background_List
YPL147W	MATCH	1	PXA1	S. cerevisiae	PeroXisomal ABC-transporter	2613	YPL147W	S000006068	ORF	Background_List
YER164W	MATCH	1	CHD1	S. cerevisiae	Chromatin organization modifier, Helicase, and DNA-binding domains	4407	YER164W	S000000966	ORF	Background_List
YEL026W	MATCH	1	SNU13	S. cerevisiae	Small NUclear ribonucleoprotein associated	381	YEL026W	S000000752	ORF	Background_List
YPL232W	MATCH	1	SSO1	S. cerevisiae	Supressor of Sec One	873	YPL232W	S000006153	ORF	Background_List
YNL289W	MATCH	1	PCL1	S. cerevisiae	Pho85 CycLin	840	YNL289W	S000005233	ORF	Background_List
YPR108W	MATCH	1	RPN7	S. cerevisiae	Regulatory Particle Non-ATPase	1290	YPR108W	S000006312	ORF	Background_List
YLR186W	MATCH	1	EMG1	S. cerevisiae	Essential for Mitotic Growth	759	YLR186W	S000004176	ORF	Background_List
YBR192W	MATCH	1	RIM2	S. cerevisiae	Replication In Mitochondria	1134	YBR192W	S000000396	ORF	Background_List
YDR406W	MATCH	1	PDR15	S. cerevisiae	Pleiotropic Drug Resistance	4590	YDR406W	S000002814	ORF	Background_List
YIL125W	MATCH	1	KGD1	S. cerevisiae	alpha-KetoGlutarate Dehydrogenase	3045	YIL125W	S000001387	ORF	Background_List
YNL022C	MATCH	1	RCM1	S. cerevisiae		1473	YNL022C	S000004967	ORF	Background_List
YMR101C	MATCH	1	SRT1	S. cerevisiae	Suppressor of Rer-Two	1032	YMR101C	S000004707	ORF	Background_List
YNL240C	MATCH	1	NAR1	S. cerevisiae	Nuclear Architecture Related	1476	YNL240C	S000005184	ORF	Background_List
YGR055W	MATCH	1	MUP1	S. cerevisiae	Methionine UPtake	1725	YGR055W	S000003287	ORF	Background_List
YGL001C	MATCH	1	ERG26	S. cerevisiae	ERGosterol biosynthesis	1050	YGL001C	S000002969	ORF	Background_List
YPL059W	MATCH	1	GRX5	S. cerevisiae	GlutaRedoXin	453	YPL059W	S000005980	ORF	Background_List
YCR009C	MATCH	1	RVS161	S. cerevisiae	Reduced Viability on Starvation	798	YCR009C	S000000602	ORF	Background_List
YDL087C	MATCH	1	LUC7	S. cerevisiae	Lethal Unless Cap-binding complex is produced	786	YDL087C	S000002245	ORF	Background_List
YEL027W	MATCH	1	VMA3	S. cerevisiae	Vacuolar Membrane Atpase	483	YEL027W	S000000753	ORF	Background_List
YKR070W	MATCH	1		S. cerevisiae		1059	YKR070W	S000001778	ORF	Background_List
YDR050C	MATCH	1	TPI1	S. cerevisiae	Triose-Phosphate Isomerase	747	YDR050C	S000002457	ORF	Background_List
YOR278W	MATCH	1	HEM4	S. cerevisiae	HEMe biosynthesis	828	YOR278W	S000005804	ORF	Background_List
YGR274C	MATCH	1	TAF1	S. cerevisiae	TATA binding protein-Associated Factor	3201	YGR274C	S000003506	ORF	Background_List
YNL288W	MATCH	1	CAF40	S. cerevisiae	CCR4 Associated Factor	1122	YNL288W	S000005232	ORF	Background_List
YBL102W	MATCH	1	SFT2	S. cerevisiae	Suppressor of sed Five Ts	648	YBL102W	S000000198	ORF	Background_List
YKL060C	MATCH	1	FBA1	S. cerevisiae	Fructose-1,6-Bisphosphate Aldolase	1080	YKL060C	S000001543	ORF	Background_List
YGR189C	MATCH	1	CRH1	S. cerevisiae	Congo Red Hypersensitive	1524	YGR189C	S000003421	ORF	Background_List
YKR071C	MATCH	1	DRE2	S. cerevisiae	Derepressed for Ribosomal protein S14 Expression	1047	YKR071C	S000001779	ORF	Background_List
YKR095W-A	MATCH	1	PCC1	S. cerevisiae	Polarized growth Chromatin-associated Controller	342	YKR095W-A	S000028512	ORF	Background_List
YIL039W	MATCH	1	TED1	S. cerevisiae	Trafficking of Emp24p/Erv25p-dependent cargo Disrupted	1422	YIL039W	S000001301	ORF	Background_List
YDR182W	MATCH	1	CDC1	S. cerevisiae	Cell Division Cycle	1476	YDR182W	S000002590	ORF	Background_List
YKL193C	MATCH	1	SDS22	S. cerevisiae	homolog of S. pombe SDS22	1017	YKL193C	S000001676	ORF	Background_List
YCR008W	MATCH	1	SAT4	S. cerevisiae		1812	YCR008W	S000000601	ORF	Background_List
YLL001W	MATCH	1	DNM1	S. cerevisiae	DyNaMin-related	2274	YLL001W	S000003924	ORF	Background_List
YNL154C	MATCH	1	YCK2	S. cerevisiae	Yeast Casein Kinase	1641	YNL154C	S000005098	ORF	Background_List
YGR141W	MATCH	1	VPS62	S. cerevisiae	Vacuolar Protein Sorting	1404	YGR141W	S000003373	ORF	Background_List
YDL040C	MATCH	1	NAT1	S. cerevisiae	N-terminal AcetylTransferase	2565	YDL040C	S000002198	ORF	Background_List
YEL029C	MATCH	1	BUD16	S. cerevisiae	BUD site selection	939	YEL029C	S000000755	ORF	Background_List
YMR235C	MATCH	1	RNA1	S. cerevisiae	rapid cessation of net RNA accumulation	1224	YMR235C	S000004848	ORF	Background_List
YPL012W	MATCH	1	RRP12	S. cerevisiae	Ribosomal RNA Processing	3687	YPL012W	S000005933	ORF	Background_List
YBL016W	MATCH	1	FUS3	S. cerevisiae	cell FUSion	1062	YBL016W	S000000112	ORF	Background_List
YPL145C	MATCH	1	KES1	S. cerevisiae	KrE11-1 Suppressor	1305	YPL145C	S000006066	ORF	Background_List
YDR097C	MATCH	1	MSH6	S. cerevisiae	MutS Homolog	3729	YDR097C	S000002504	ORF	Background_List
YNL021W	MATCH	1	HDA1	S. cerevisiae	Histone DeAcetylase	2121	YNL021W	S000004966	ORF	Background_List
YGL048C	MATCH	1	RPT6	S. cerevisiae	Regulatory Particle Triple-A protein, or Regulatory Particle Triphosphatase	1218	YGL048C	S000003016	ORF	Background_List
YNL287W	MATCH	1	SEC21	S. cerevisiae	SECretory	2808	YNL287W	S000005231	ORF	Background_List
YER163C	MATCH	1	GCG1	S. cerevisiae	Gamma-glutamyl Cyclotransferase acting on Glutathione	699	YER163C	S000000965	ORF	Background_List
YOR145C	MATCH	1	PNO1	S. cerevisiae	Partner of NOb1	825	YOR145C	S000005671	ORF	Background_List
YER078C	MATCH	1	ICP55	S. cerevisiae	Intermediate Cleaving Peptidase	1536	YER078C	S000000880	ORF	Background_List
YKL194C	MATCH	1	MST1	S. cerevisiae	Mitochondrial aminoacyl-tRNA Synthetase, Threonine	1389	YKL194C	S000001677	ORF	Background_List
YBL017C	MATCH	1	PEP1	S. cerevisiae	carboxyPEPtidase Y-deficient	4740	YBL017C	S000000113	ORF	Background_List
YIL121W	MATCH	1	QDR2	S. cerevisiae	QuiniDine Resistance	1629	YIL121W	S000001383	ORF	Background_List
YDR404C	MATCH	1	RPB7	S. cerevisiae	RNA Polymerase B	516	YDR404C	S000002812	ORF	Background_List
YGR271W	MATCH	1	SLH1	S. cerevisiae	SKI2-Like Helicase	5904	YGR271W	S000003503	ORF	Background_List
YHR038W	MATCH	1	RRF1	S. cerevisiae	Ribosome Recycling Factor	693	YHR038W	S000001080	ORF	Background_List
YKL150W	MATCH	1	MCR1	S. cerevisiae	Mitochondrial NADH-Cytochrome b5 Reductase	909	YKL150W	S000001633	ORF	Background_List
YBL015W	MATCH	1	ACH1	S. cerevisiae	Acetyl CoA Hydrolase	1581	YBL015W	S000000111	ORF	Background_List
YHR123W	MATCH	1	EPT1	S. cerevisiae	EthanolaminePhosphoTransferase	1267	YHR123W	S000001165	ORF	Background_List
YDR091C	MATCH	1	RLI1	S. cerevisiae	RNase L Inhibitor	1827	YDR091C	S000002498	ORF	Background_List
YLR056W	MATCH	1	ERG3	S. cerevisiae	ERGosterol biosynthesis	1098	YLR056W	S000004046	ORF	Background_List
YNL113W	MATCH	1	RPC19	S. cerevisiae	RNA Polymerase C	429	YNL113W	S000005057	ORF	Background_List
YNL246W	MATCH	1	VPS75	S. cerevisiae	Vacuolar Protein Sorting	890	YNL246W	S000005190	ORF	Background_List
YHR039C	MATCH	1	MSC7	S. cerevisiae	Meiotic Sister-Chromatid recombination	1935	YHR039C	S000001081	ORF	Background_List
YLR274W	MATCH	1	MCM5	S. cerevisiae	MiniChromosome Maintenance	2328	YLR274W	S000004264	ORF	Background_List
YOR321W	MATCH	1	PMT3	S. cerevisiae	Protein O-MannosylTransferase	2262	YOR321W	S000005848	ORF	Background_List
YPL057C	MATCH	1	SUR1	S. cerevisiae	SUppressor of Rvs161 and rvs167 mutations	1149	YPL057C	S000005978	ORF	Background_List
YDR536W	MATCH	1	STL1	S. cerevisiae	Sugar Transporter-Like protein	1710	YDR536W	S000002944	ORF	Background_List
YJR113C	MATCH	1	RSM7	S. cerevisiae	Ribosomal Small subunit of Mitochondria	744	YJR113C	S000003874	ORF	Background_List
YGR187C	MATCH	1	HGH1	S. cerevisiae	HmG1/2 Homolog	1185	YGR187C	S000003419	ORF	Background_List
YBR196C	MATCH	1	PGI1	S. cerevisiae	PhosphoGlucoIsomerase	1665	YBR196C	S000000400	ORF	Background_List
YER122C	MATCH	1	GLO3	S. cerevisiae	GLyOxalase	1482	YER122C	S000000924	ORF	Background_List
YKL151C	MATCH	1	NNR2	S. cerevisiae	Nicotinamide Nucleotide Repair	1014	YKL151C	S000001634	ORF	Background_List
YGR054W	MATCH	1		S. cerevisiae		1929	YGR054W	S000003286	ORF	Background_List
YNL330C	MATCH	1	RPD3	S. cerevisiae	Reduced Potassium Dependency	1302	YNL330C	S000005274	ORF	Background_List
YKL152C	MATCH	1	GPM1	S. cerevisiae	Glycerate PhosphoMutase	744	YKL152C	S000001635	ORF	Background_List
YLR276C	MATCH	1	DBP9	S. cerevisiae	Dead Box Protein	1785	YLR276C	S000004266	ORF	Background_List
YBR281C	MATCH	1	DUG2	S. cerevisiae	Deficient in Utilization of Glutathione	2637	YBR281C	S000000485	ORF	Background_List
YGL006W	MATCH	1	PMC1	S. cerevisiae	Plasma Membrane Calcium	3522	YGL006W	S000002974	ORF	Background_List
YPL143W	MATCH	1	RPL33A	S. cerevisiae	Ribosomal Protein of the Large subunit	849	YPL143W	S000006064	ORF	Background_List
YMR236W	MATCH	1	TAF9	S. cerevisiae	TATA binding protein-Associated Factor	474	YMR236W	S000004849	ORF	Background_List
YOR236W	MATCH	1	DFR1	S. cerevisiae	DihydroFolate Reductase	636	YOR236W	S000005762	ORF	Background_List
YDR090C	MATCH	1	ILT1	S. cerevisiae	Ionic Liquid Tolerance	933	YDR090C	S000002497	ORF	Background_List
YPL010W	MATCH	1	RET3	S. cerevisiae	RETrieval from ER	570	YPL010W	S000005931	ORF	Background_List
YLR142W	MATCH	1	PUT1	S. cerevisiae	Proline UTilization	1431	YLR142W	S000004132	ORF	Background_List
YLR275W	MATCH	1	SMD2	S. cerevisiae		423	YLR275W	S000004265	ORF	Background_List
YGL224C	MATCH	1	SDT1	S. cerevisiae	Suppressor of Disruption of TFIIS	843	YGL224C	S000003192	ORF	Background_List
YMR237W	MATCH	1	BCH1	S. cerevisiae	Bud7 and Chs6 Homolog	2175	YMR237W	S000004850	ORF	Background_List
YER036C	MATCH	1	ARB1	S. cerevisiae	ATP-binding cassette protein involved in Ribosome Biogenesis	1833	YER036C	S000000838	ORF	Background_List
YNL112W	MATCH	1	DBP2	S. cerevisiae	Dead Box Protein	2643	YNL112W	S000005056	ORF	Background_List
YOR103C	MATCH	1	OST2	S. cerevisiae	OligoSaccharylTransferase	393	YOR103C	S000005629	ORF	Background_List
YLR058C	MATCH	1	SHM2	S. cerevisiae	Serine HydroxyMethyltransferase	1410	YLR058C	S000004048	ORF	Background_List
YDL178W	MATCH	1	DLD2	S. cerevisiae	D-Lactate Dehydrogenase	1593	YDL178W	S000002337	ORF	Background_List
YOR369C	MATCH	1	RPS12	S. cerevisiae	Ribosomal Protein of the Small subunit	432	YOR369C	S000005896	ORF	Background_List
YMR105C	MATCH	1	PGM2	S. cerevisiae	PhosphoGlucoMutase	1710	YMR105C	S000004711	ORF	Background_List
YNL111C	MATCH	1	CYB5	S. cerevisiae	CYtochrome B	363	YNL111C	S000005055	ORF	Background_List
YNL244C	MATCH	1	SUI1	S. cerevisiae	SUppressor of Initiator codon	327	YNL244C	S000005188	ORF	Background_List
YIL035C	MATCH	1	CKA1	S. cerevisiae	Casein Kinase Alpha subunit	1119	YIL035C	S000001297	ORF	Background_List
YPL188W	MATCH	1	POS5	S. cerevisiae	PerOxide Sensitive	1245	YPL188W	S000006109	ORF	Background_List
YML060W	MATCH	1	OGG1	S. cerevisiae	8-OxoGuanine Glycosylase/lyase	1131	YML060W	S000004525	ORF	Background_List
YOR101W	MATCH	1	RAS1	S. cerevisiae	homologous to RAS proto-oncogene	930	YOR101W	S000005627	ORF	Background_List
YMR238W	MATCH	1	DFG5	S. cerevisiae	Defective for Filamentous Growth	1377	YMR238W	S000004851	ORF	Background_List
YGR185C	MATCH	1	TYS1	S. cerevisiae	TYrosyl-tRNA Synthetase	1185	YGR185C	S000003417	ORF	Background_List
YDR405W	MATCH	1	MRP20	S. cerevisiae	Mitochondrial Ribosomal Protein	792	YDR405W	S000002813	ORF	Background_List
YJR111C	MATCH	1	PXP2	S. cerevisiae	PeroXisomal Protein	852	YJR111C	S000003872	ORF	Background_List
YGL137W	MATCH	1	SEC27	S. cerevisiae	SECretory	2870	YGL137W	S000003105	ORF	Background_List
YPL140C	MATCH	1	MKK2	S. cerevisiae	Mitogen-activated Kinase Kinase	1521	YPL140C	S000006061	ORF	Background_List
YBR061C	MATCH	1	TRM7	S. cerevisiae	Transfer RNA Methyltransferase	933	YBR061C	S000000265	ORF	Background_List
YKL064W	MATCH	1	MNR2	S. cerevisiae	MaNganese Resistance	2910	YKL064W	S000001547	ORF	Background_List
YDL177C	MATCH	1		S. cerevisiae		513	YDL177C	S000002336	ORF	Background_List
YOR367W	MATCH	1	SCP1	S. cerevisiae	S. cerevisiae CalPonin	603	YOR367W	S000005894	ORF	Background_List
YNL025C	MATCH	1	SSN8	S. cerevisiae	Suppressor of SNf1	972	YNL025C	S000004970	ORF	Background_List
YCR004C	MATCH	1	YCP4	S. cerevisiae		744	YCR004C	S000000597	ORF	Background_List
YER166W	MATCH	1	DNF1	S. cerevisiae	Drs2 Neo1 Family	4716	YER166W	S000000968	ORF	Background_List
YIL034C	MATCH	1	CAP2	S. cerevisiae	CAPping	864	YIL034C	S000001296	ORF	Background_List
YLR188W	MATCH	1	MDL1	S. cerevisiae	MultiDrug resistance-Like	2088	YLR188W	S000004178	ORF	Background_List
YJL109C	MATCH	1	UTP10	S. cerevisiae	U Three Protein	5310	YJL109C	S000003645	ORF	Background_List
YCR003W	MATCH	1	MRPL32	S. cerevisiae	Mitochondrial Ribosomal Protein, Large subunit	552	YCR003W	S000000596	ORF	Background_List
YNL243W	MATCH	1	SLA2	S. cerevisiae	Synthetic Lethal with ABP1	2907	YNL243W	S000005187	ORF	Background_List
YOL090W	MATCH	1	MSH2	S. cerevisiae	MutS Homolog	2895	YOL090W	S000005450	ORF	Background_List
YJR025C	MATCH	1	BNA1	S. cerevisiae	Biosynthesis of Nicotinic Acid	534	YJR025C	S000003786	ORF	Background_List
YLL006W	MATCH	1	MMM1	S. cerevisiae	Maintenance of Mitochondrial Morphology	1281	YLL006W	S000003929	ORF	Background_List
YDR092W	MATCH	1	UBC13	S. cerevisiae	UBiquitin-Conjugating	730	YDR092W	S000002499	ORF	Background_List
YPL239W	MATCH	1	YAR1	S. cerevisiae	Yeast Ankyrin Repeat	603	YPL239W	S000006160	ORF	Background_List
YDR055W	MATCH	1	PST1	S. cerevisiae	Protoplasts-SecreTed	1335	YDR055W	S000002462	ORF	Background_List
YOL133W	MATCH	1	HRT1	S. cerevisiae	High level expression Reduces Ty3 transposition	366	YOL133W	S000005493	ORF	Background_List
YDR188W	MATCH	1	CCT6	S. cerevisiae	Chaperonin Containing TCP-1	1641	YDR188W	S000002596	ORF	Background_List
YKR076W	MATCH	1	ECM4	S. cerevisiae	ExtraCellular Mutant	1113	YKR076W	S000001784	ORF	Background_List
YDL134C	MATCH	1	PPH21	S. cerevisiae	Protein PHosphatase	1110	YDL134C	S000002292	ORF	Background_List
YNL075W	MATCH	1	IMP4	S. cerevisiae	Interacting with Mpp10p	873	YNL075W	S000005019	ORF	Background_List
YAL007C	MATCH	1	ERP2	S. cerevisiae	Emp24p/Erv25p Related Protein	648	YAL007C	S000000005	ORF	Background_List
YGR280C	MATCH	1	PXR1	S. cerevisiae	PinX1-Related gene	816	YGR280C	S000003512	ORF	Background_List
YOR272W	MATCH	1	YTM1	S. cerevisiae		1383	YOR272W	S000005798	ORF	Background_List
YPR028W	MATCH	1	YOP1	S. cerevisiae	YIP One Partner	676	YPR028W	S000006232	ORF	Background_List
YPL106C	MATCH	1	SSE1	S. cerevisiae	Stress Seventy subfamily E	2082	YPL106C	S000006027	ORF	Background_List
YOR187W	MATCH	1	TUF1	S. cerevisiae		1314	YOR187W	S000005713	ORF	Background_List
YPR113W	MATCH	1	PIS1	S. cerevisiae	Phosphatidyl Inositol Synthase	663	YPR113W	S000006317	ORF	Background_List
YGR062C	MATCH	1	COX18	S. cerevisiae	Cytochrome c OXidase	951	YGR062C	S000003294	ORF	Background_List
YDR140W	MATCH	1	MTQ2	S. cerevisiae	Methyltransferase	666	YDR140W	S000002547	ORF	Background_List
YGR195W	MATCH	1	SKI6	S. cerevisiae	SuperKIller	741	YGR195W	S000003427	ORF	Background_List
YLR002C	MATCH	1	NOC3	S. cerevisiae	NucleOlar Complex associated	1992	YLR002C	S000003992	ORF	Background_List
YPR112C	MATCH	1	MRD1	S. cerevisiae	Multiple RNA-binding domain	2664	YPR112C	S000006316	ORF	Background_List
YHR168W	MATCH	1	MTG2	S. cerevisiae	MiTochondrial Gtpase 2	1557	YHR168W	S000001211	ORF	Background_List
YOL049W	MATCH	1	GSH2	S. cerevisiae	Glutathione	1476	YOL049W	S000005409	ORF	Background_List
YER074W-A	MATCH	1	YOS1	S. cerevisiae	Yip One Suppressor	471	YER074W-A	S000007651	ORF	Background_List
YNL292W	MATCH	1	PUS4	S. cerevisiae	PseudoUridine Synthase	1212	YNL292W	S000005236	ORF	Background_List
YGL187C	MATCH	1	COX4	S. cerevisiae	Cytochrome c OXidase	468	YGL187C	S000003155	ORF	Background_List
YHR120W	MATCH	1	MSH1	S. cerevisiae	MutS Homolog	2880	YHR120W	S000001162	ORF	Background_List
YGL054C	MATCH	1	ERV14	S. cerevisiae	ER Vesicle	417	YGL054C	S000003022	ORF	Background_List
YDL135C	MATCH	1	RDI1	S. cerevisiae	Rho GDP Dissociation Inhibitor	609	YDL135C	S000002294	ORF	Background_List
YJL097W	MATCH	1	PHS1	S. cerevisiae	PTPLA Homolog involved in Sphingolipid biosynthesis 1	654	YJL097W	S000003633	ORF	Background_List
YER113C	MATCH	1	TMN3	S. cerevisiae	TransMembrane Nine	2121	YER113C	S000000915	ORF	Background_List
YMR108W	MATCH	1	ILV2	S. cerevisiae	IsoLeucine-plus-Valine requiring	2064	YMR108W	S000004714	ORF	Background_List
YGR063C	MATCH	1	SPT4	S. cerevisiae	SuPpressor of Ty's	309	YGR063C	S000003295	ORF	Background_List
YDL001W	MATCH	1	RMD1	S. cerevisiae	Required for Meiotic nuclear Division	1293	YDL001W	S000002159	ORF	Background_List
YHR005C-A	MATCH	1	TIM10	S. cerevisiae	Translocase of the Inner Membrane	282	YHR005C-A	S000003530	ORF	Background_List
YPL237W	MATCH	1	SUI3	S. cerevisiae	SUppressor of Initiator codon	858	YPL237W	S000006158	ORF	Background_List
YAR015W	MATCH	1	ADE1	S. cerevisiae	ADEnine requiring	921	YAR015W	S000000070	ORF	Background_List
YPL104W	MATCH	1	MSD1	S. cerevisiae	Mitochondrial aminoacyl-tRNA Synthetase, Aspartate (D)	1977	YPL104W	S000006025	ORF	Background_List
YHR169W	MATCH	1	DBP8	S. cerevisiae	Dead Box Protein	1296	YHR169W	S000001212	ORF	Background_List
YLR398C	MATCH	1	SKI2	S. cerevisiae	SuperKIller	3864	YLR398C	S000004390	ORF	Background_List
YOR271C	MATCH	1	FSF1	S. cerevisiae	Fungal SideroFlexin 1	984	YOR271C	S000005797	ORF	Background_List
YNL073W	MATCH	1	MSK1	S. cerevisiae	Mitochondrial aminoacyl-tRNA Synthetase, lysine (K)	1731	YNL073W	S000005017	ORF	Background_List
YBR202W	MATCH	1	MCM7	S. cerevisiae	MiniChromosome Maintenance	2538	YBR202W	S000000406	ORF	Background_List
YKR030W	MATCH	1	GMH1	S. cerevisiae	Gea1-6 Membrane-associated High-copy suppressor	822	YKR030W	S000001738	ORF	Background_List
YGL186C	MATCH	1	TPN1	S. cerevisiae	Transport of PyridoxiNe	1740	YGL186C	S000003154	ORF	Background_List
YKL067W	MATCH	1	YNK1	S. cerevisiae	Yeast Nucleoside diphosphate Kinase	462	YKL067W	S000001550	ORF	Background_List
YJL050W	MATCH	1	MTR4	S. cerevisiae	Mrna TRansport	3222	YJL050W	S000003586	ORF	Background_List
YMR109W	MATCH	1	MYO5	S. cerevisiae	MYOsin	3660	YMR109W	S000004715	ORF	Background_List
YGR193C	MATCH	1	PDX1	S. cerevisiae	Pyruvate Dehydrogenase complex protein X	1233	YGR193C	S000003425	ORF	Background_List
YLR264W	MATCH	1	RPS28B	S. cerevisiae	Ribosomal Protein of the Small subunit	204	YLR264W	S000004254	ORF	Background_List
YPL019C	MATCH	1	VTC3	S. cerevisiae	Vacuolar Transporter Chaperone	2508	YPL019C	S000005940	ORF	Background_List
YDL131W	MATCH	1	LYS21	S. cerevisiae	LYSine	1323	YDL131W	S000002289	ORF	Background_List
YDR361C	MATCH	1	BCP1	S. cerevisiae		852	YDR361C	S000002769	ORF	Background_List
YKR031C	MATCH	1	SPO14	S. cerevisiae	SPOrulation	5052	YKR031C	S000001739	ORF	Background_List
YDR276C	MATCH	1	PMP3	S. cerevisiae	Plasma Membrane Proteolipid	168	YDR276C	S000002684	ORF	Background_List
YOL002C	MATCH	1	IZH2	S. cerevisiae	Implicated in Zinc Homeostasis	954	YOL002C	S000005362	ORF	Background_List
YOL135C	MATCH	1	MED7	S. cerevisiae	MEDiator complex	669	YOL135C	S000005495	ORF	Background_List
YDL046W	MATCH	1	NPC2	S. cerevisiae	Niemann Pick type C homolog	522	YDL046W	S000002204	ORF	Background_List
YOR270C	MATCH	1	VPH1	S. cerevisiae	Vacuolar pH	2523	YOR270C	S000005796	ORF	Background_List
YDR189W	MATCH	1	SLY1	S. cerevisiae	Suppressor of Loss of Ypt1	2001	YDR189W	S000002597	ORF	Background_List
YKL021C	MATCH	1	MAK11	S. cerevisiae	MAintenance of Killer	1407	YKL021C	S000001504	ORF	Background_List
YLR351C	MATCH	1	NIT3	S. cerevisiae	NITrilase superfamily	876	YLR351C	S000004343	ORF	Background_List
YOR185C	MATCH	1	GSP2	S. cerevisiae	Genetic Suppressor of Prp20-1	663	YOR185C	S000005711	ORF	Background_List
YHR037W	MATCH	1	PUT2	S. cerevisiae	Proline UTilization	1728	YHR037W	S000001079	ORF	Background_List
YNL072W	MATCH	1	RNH201	S. cerevisiae	RNase H	924	YNL072W	S000005016	ORF	Background_List
YER025W	MATCH	1	GCD11	S. cerevisiae	General Control Derepressed	1584	YER025W	S000000827	ORF	Background_List
YHR122W	MATCH	1	CIA2	S. cerevisiae	Cytosolic Iron-sulfur protein Assembly	696	YHR122W	S000001164	ORF	Background_List
YBR118W	MATCH	1	TEF2	S. cerevisiae	Translation Elongation Factor	1377	YBR118W	S000000322	ORF	Background_List
YNL290W	MATCH	1	RFC3	S. cerevisiae	Replication Factor C	1023	YNL290W	S000005234	ORF	Background_List
YPR029C	MATCH	1	APL4	S. cerevisiae	clathrin Adaptor Protein complex Large chain	2499	YPR029C	S000006233	ORF	Background_List
YOR099W	MATCH	1	KTR1	S. cerevisiae	Kre Two Related	1182	YOR099W	S000005625	ORF	Background_List
YGR061C	MATCH	1	ADE6	S. cerevisiae	ADEnine requiring	4077	YGR061C	S000003293	ORF	Background_List
YJL184W	MATCH	1	GON7	S. cerevisiae		372	YJL184W	S000003720	ORF	Background_List
YOR184W	MATCH	1	SER1	S. cerevisiae	SERine requiring	1188	YOR184W	S000005710	ORF	Background_List
YDL132W	MATCH	1	CDC53	S. cerevisiae	Cell Division Cycle	2448	YDL132W	S000002290	ORF	Background_List
YIR007W	MATCH	1	EGH1	S. cerevisiae	Cryptococcus neoformans EGCrP2 Homolog	2295	YIR007W	S000001446	ORF	Background_List
YKL069W	MATCH	1		S. cerevisiae		543	YKL069W	S000001552	ORF	Background_List
YDR142C	MATCH	1	PEX7	S. cerevisiae	PEroXin	1128	YDR142C	S000002549	ORF	Background_List
YER026C	MATCH	1	CHO1	S. cerevisiae	CHOline requiring	831	YER026C	S000000828	ORF	Background_List
YGR194C	MATCH	1	XKS1	S. cerevisiae	XyluloKinaSe	1803	YGR194C	S000003426	ORF	Background_List
YER159C	MATCH	1	BUR6	S. cerevisiae	Bypass UAS Requirement	429	YER159C	S000000961	ORF	Background_List
YOL003C	MATCH	1	PFA4	S. cerevisiae	Protein Fatty Acyltransferase	1137	YOL003C	S000005363	ORF	Background_List
YLR399C	MATCH	1	BDF1	S. cerevisiae	BromoDomain Factor	2061	YLR399C	S000004391	ORF	Background_List
YIR008C	MATCH	1	PRI1	S. cerevisiae	DNA PRImase	1230	YIR008C	S000001447	ORF	Background_List
YCL030C	MATCH	1	HIS4	S. cerevisiae	HIStidine requiring	2400	YCL030C	S000000535	ORF	Background_List
YDL047W	MATCH	1	SIT4	S. cerevisiae	Suppressor of Initiation of Transcription	936	YDL047W	S000002205	ORF	Background_List
YGR060W	MATCH	1	ERG25	S. cerevisiae	ERGosterol biosynthesis	930	YGR060W	S000003292	ORF	Background_List
YGL099W	MATCH	1	LSG1	S. cerevisiae	Large-Subunit Gtpase	1923	YGL099W	S000003067	ORF	Background_List
YJR109C	MATCH	1	CPA2	S. cerevisiae	Carbamyl Phosphate synthetase A	3357	YJR109C	S000003870	ORF	Background_List
YOR362C	MATCH	1	PRE10	S. cerevisiae	PRoteinase yscE	867	YOR362C	S000005889	ORF	Background_List
YER117W	MATCH	1	RPL23B	S. cerevisiae	Ribosomal Protein of the Large subunit	885	YER117W	S000000919	ORF	Background_List
YLR441C	MATCH	1	RPS1A	S. cerevisiae	Ribosomal Protein of the Small subunit	768	YLR441C	S000004433	ORF	Background_List
YOL004W	MATCH	1	SIN3	S. cerevisiae	Switch INdependent	4611	YOL004W	S000005364	ORF	Background_List
YFR032C-A	MATCH	1	RPL29	S. cerevisiae	Ribosomal Protein of the Large subunit	180	YFR032C-A	S000006437	ORF	Background_List
YGL011C	MATCH	1	SCL1	S. cerevisiae	Suppressor of Crl3 ts Lethality	759	YGL011C	S000002979	ORF	Background_List
YPL235W	MATCH	1	RVB2	S. cerevisiae	RuVB-like	1416	YPL235W	S000006156	ORF	Background_List
YHR163W	MATCH	1	SOL3	S. cerevisiae	Suppressor Of Los1-1	750	YHR163W	S000001206	ORF	Background_List
YNL032W	MATCH	1	SIW14	S. cerevisiae	Synthetic Interaction with Whi2	846	YNL032W	S000004977	ORF	Background_List
YHR079C	MATCH	1	IRE1	S. cerevisiae	Inositol REquiring	3348	YHR079C	S000001121	ORF	Background_List
YGL058W	MATCH	1	RAD6	S. cerevisiae	RADiation sensitive	519	YGL058W	S000003026	ORF	Background_List
YDL004W	MATCH	1	ATP16	S. cerevisiae	ATP synthase	483	YDL004W	S000002162	ORF	Background_List
YJL094C	MATCH	1	KHA1	S. cerevisiae	K/H ion Antiporter	2622	YJL094C	S000003630	ORF	Background_List
YOR361C	MATCH	1	PRT1	S. cerevisiae	PRoTein synthesis	2292	YOR361C	S000005888	ORF	Background_List
YNL031C	MATCH	1	HHT2	S. cerevisiae	Histone H Three	411	YNL031C	S000004976	ORF	Background_List
YGL143C	MATCH	1	MRF1	S. cerevisiae	Mitochondrial peptide chain Release Factor	1242	YGL143C	S000003111	ORF	Background_List
YKR035W-A	MATCH	1	DID2	S. cerevisiae	Doa4-Independent Degradation	615	YKR035W-A	S000006435	ORF	Background_List
YNL030W	MATCH	1	HHF2	S. cerevisiae	Histone H Four	312	YNL030W	S000004975	ORF	Background_List
YOR142W	MATCH	1	LSC1	S. cerevisiae	Ligase of Succinyl-CoA	990	YOR142W	S000005668	ORF	Background_List
YHR165C	MATCH	1	PRP8	S. cerevisiae	Pre-mRNA Processing	7242	YHR165C	S000001208	ORF	Background_List
YLR005W	MATCH	1	SSL1	S. cerevisiae	Suppressor of Stem-Loop mutation	1386	YLR005W	S000003995	ORF	Background_List
YLR138W	MATCH	1	NHA1	S. cerevisiae	Na+/H+ Antiporter	2958	YLR138W	S000004128	ORF	Background_List
YPR201W	MATCH	1	ARR3	S. cerevisiae	ARsenicals Resistance	1215	YPR201W	S000006405	ORF	Background_List
YIR009W	MATCH	1	MSL1	S. cerevisiae	MUD Synthetic Lethal	336	YIR009W	S000001448	ORF	Background_List
YPL236C	MATCH	1	ENV7	S. cerevisiae	late ENdosome and Vacuole interface function	1095	YPL236C	S000006157	ORF	Background_List
YDL138W	MATCH	1	RGT2	S. cerevisiae	Restores Glucose Transport	2292	YDL138W	S000002297	ORF	Background_List
YOL005C	MATCH	1	RPB11	S. cerevisiae	RNA Polymerase B	363	YOL005C	S000005365	ORF	Background_List
YJL180C	MATCH	1	ATP12	S. cerevisiae	ATP synthase	978	YJL180C	S000003716	ORF	Background_List
YLR354C	MATCH	1	TAL1	S. cerevisiae	TransALdolase	1008	YLR354C	S000004346	ORF	Background_List
YNL163C	MATCH	1	RIA1	S. cerevisiae	RIbosome Assembly	3333	YNL163C	S000005107	ORF	Background_List
YKR074W	MATCH	1	AIM29	S. cerevisiae	Altered Inheritance rate of Mitochondria	468	YKR074W	S000001782	ORF	Background_List
YGL142C	MATCH	1	GPI10	S. cerevisiae	GlycosylPhosphatidylInositol anchor biosynthesis	1851	YGL142C	S000003110	ORF	Background_List
YHR032W	MATCH	1	ERC1	S. cerevisiae	Ethionine Resistance Conferring	1746	YHR032W	S000001074	ORF	Background_List
YOR274W	MATCH	1	MOD5	S. cerevisiae	tRNA MODification	1287	YOR274W	S000005800	ORF	Background_List
YPR119W	MATCH	1	CLB2	S. cerevisiae	CycLin B	1476	YPR119W	S000006323	ORF	Background_List
YKL157W	MATCH	1	APE2	S. cerevisiae	AminoPEptidase	3242	YKL157W	S000001640	ORF	Background_List
YLR220W	MATCH	1	CCC1	S. cerevisiae	Cross-Complements Ca(2+) phenotype of csg1	969	YLR220W	S000004210	ORF	Background_List
YLR268W	MATCH	1	SEC22	S. cerevisiae	SECretory	645	YLR268W	S000004258	ORF	Background_List
YPL015C	MATCH	1	HST2	S. cerevisiae	Homolog of SIR Two (SIR2)	1074	YPL015C	S000005936	ORF	Background_List
YHR166C	MATCH	1	CDC23	S. cerevisiae	Cell Division Cycle	1881	YHR166C	S000001209	ORF	Background_List
YOL006C	MATCH	1	TOP1	S. cerevisiae	TOPoisomerase	2310	YOL006C	S000005366	ORF	Background_List
YOL139C	MATCH	1	CDC33	S. cerevisiae	Cell Division Cycle	642	YOL139C	S000005499	ORF	Background_List
YKL110C	MATCH	1	KTI12	S. cerevisiae	Kluveromyces lactis Toxin Insensitive	942	YKL110C	S000001593	ORF	Background_List
YBR207W	MATCH	1	FTH1	S. cerevisiae	FTR1 Homolog	1398	YBR207W	S000000411	ORF	Background_List
YLR222C	MATCH	1	UTP13	S. cerevisiae	U Three Protein	2454	YLR222C	S000004212	ORF	Background_List
YNL161W	MATCH	1	CBK1	S. cerevisiae	Cell wall Biosynthesis Kinase	2271	YNL161W	S000005105	ORF	Background_List
YJR105W	MATCH	1	ADO1	S. cerevisiae	ADenOsine kinase	1023	YJR105W	S000003866	ORF	Background_List
YPL101W	MATCH	1	ELP4	S. cerevisiae	ELongator Protein	1371	YPL101W	S000006022	ORF	Background_List
YPL234C	MATCH	1	VMA11	S. cerevisiae	Vacuolar Membrane Atpase	495	YPL234C	S000006155	ORF	Background_List
YPR118W	MATCH	1	MRI1	S. cerevisiae	MethylthioRibose-1-phosphate Isomerase	1236	YPR118W	S000006322	ORF	Background_List
YBR208C	MATCH	1	DUR1,2	S. cerevisiae	Degradation of URea	5508	YBR208C	S000000412	ORF	Background_List
YLR355C	MATCH	1	ILV5	S. cerevisiae	IsoLeucine-plus-Valine requiring	1188	YLR355C	S000004347	ORF	Background_List
YLR004C	MATCH	1	THI73	S. cerevisiae	THIamine regulon	1572	YLR004C	S000003994	ORF	Background_List
YDR270W	MATCH	1	CCC2	S. cerevisiae	Cross-Complements Ca(2+) phenotype of csg1	3015	YDR270W	S000002678	ORF	Background_List
YOR056C	MATCH	1	NOB1	S. cerevisiae	Nin1 (One) Binding protein	1380	YOR056C	S000005582	ORF	Background_List
YGL055W	MATCH	1	OLE1	S. cerevisiae	OLEic acid requiring	1533	YGL055W	S000003023	ORF	Background_List
YDL136W	MATCH	1	RPL35B	S. cerevisiae	Ribosomal Protein of the Large subunit	768	YDL136W	S000002295	ORF	Background_List
YJR063W	MATCH	1	RPA12	S. cerevisiae	RNA Polymerase A	378	YJR063W	S000003824	ORF	Background_List
YOR095C	MATCH	1	RKI1	S. cerevisiae	Ribose-5-phosphate Ketol-Isomerase	777	YOR095C	S000005621	ORF	Background_List
YDR100W	MATCH	1	TVP15	S. cerevisiae	Tlg2-Vesicle Protein	432	YDR100W	S000002507	ORF	Background_List
YBL064C	MATCH	1	PRX1	S. cerevisiae	PeroxiRedoXin	786	YBL064C	S000000160	ORF	Background_List
YLR009W	MATCH	1	RLP24	S. cerevisiae	Ribosomal-Like Protein	600	YLR009W	S000003999	ORF	Background_List
YHR074W	MATCH	1	QNS1	S. cerevisiae	glutamine (Q) dependent Nad+ Synthetase	2145	YHR074W	S000001116	ORF	Background_List
YGL095C	MATCH	1	VPS45	S. cerevisiae	Vacuolar Protein Sorting	1734	YGL095C	S000003063	ORF	Background_List
YBR159W	MATCH	1	IFA38	S. cerevisiae		1044	YBR159W	S000000363	ORF	Background_List
YOL040C	MATCH	1	RPS15	S. cerevisiae	Ribosomal Protein of the Small subunit	429	YOL040C	S000005400	ORF	Background_List
YJL189W	MATCH	1	RPL39	S. cerevisiae	Ribosomal Protein of the Large subunit	542	YJL189W	S000003725	ORF	Background_List
YDL008W	MATCH	1	APC11	S. cerevisiae	Anaphase Promoting Complex	498	YDL008W	S000002166	ORF	Background_List
YOR094W	MATCH	1	ARF3	S. cerevisiae	ADP-Ribosylation Factor	552	YOR094W	S000005620	ORF	Background_List
YBR245C	MATCH	1	ISW1	S. cerevisiae	Imitation SWitch subfamily	3390	YBR245C	S000000449	ORF	Background_List
YDR232W	MATCH	1	HEM1	S. cerevisiae	HEMe biosynthesis	1647	YDR232W	S000002640	ORF	Background_List
YPR066W	MATCH	1	UBA3	S. cerevisiae	UBiquitin-like protein-Activating enzyme	900	YPR066W	S000006270	ORF	Background_List
YAL046C	MATCH	1	BOL3	S. cerevisiae	BolA-like protein	357	YAL046C	S000000044	ORF	Background_List
YML018C	MATCH	1		S. cerevisiae		1182	YML018C	S000004480	ORF	Background_List
YIL084C	MATCH	1	SDS3	S. cerevisiae	Suppressor of Defective Silencing	984	YIL084C	S000001346	ORF	Background_List
YNL209W	MATCH	1	SSB2	S. cerevisiae	Stress-Seventy subfamily B	1842	YNL209W	S000005153	ORF	Background_List
YJL010C	MATCH	1	NOP9	S. cerevisiae	NucleOlar Protein	2001	YJL010C	S000003547	ORF	Background_List
YDR148C	MATCH	1	KGD2	S. cerevisiae	alpha-KetoGlutarate Dehydrogenase	1392	YDR148C	S000002555	ORF	Background_List
YKL113C	MATCH	1	RAD27	S. cerevisiae	RADiation sensitive	1149	YKL113C	S000001596	ORF	Background_List
YDR454C	MATCH	1	GUK1	S. cerevisiae	GUanylate Kinase	564	YDR454C	S000002862	ORF	Background_List
YPR154W	MATCH	1	PIN3	S. cerevisiae	Psi+ INducibility	648	YPR154W	S000006358	ORF	Background_List
YML106W	MATCH	1	URA5	S. cerevisiae	URAcil requiring	681	YML106W	S000004574	ORF	Background_List
YJL143W	MATCH	1	TIM17	S. cerevisiae	Translocase of the Inner Mitochondrial membrane	477	YJL143W	S000003679	ORF	Background_List
YBR242W	MATCH	1		S. cerevisiae		717	YBR242W	S000000446	ORF	Background_List
YIL083C	MATCH	1	CAB2	S. cerevisiae	Coenzyme A Biosynthesis	1098	YIL083C	S000001345	ORF	Background_List
YOR092W	MATCH	1	ECM3	S. cerevisiae	ExtraCellular Mutant	1842	YOR092W	S000005618	ORF	Background_List
YDR236C	MATCH	1	FMN1	S. cerevisiae	FMN biosynthesis	657	YDR236C	S000002644	ORF	Background_List
YBR025C	MATCH	1	OLA1	S. cerevisiae	Obg-Like ATPase	1185	YBR025C	S000000229	ORF	Background_List
YBR243C	MATCH	1	ALG7	S. cerevisiae	Asparagine-Linked Glycosylation	1347	YBR243C	S000000447	ORF	Background_List
YMR193W	MATCH	1	MRPL24	S. cerevisiae	Mitochondrial Ribosomal Protein, Large subunit	777	YMR193W	S000004806	ORF	Background_List
YDR234W	MATCH	1	LYS4	S. cerevisiae	LYSine requiring	2082	YDR234W	S000002642	ORF	Background_List
YKL114C	MATCH	1	APN1	S. cerevisiae	APurinic/apyrimidinic eNdonuclease	1104	YKL114C	S000001597	ORF	Background_List
YDR367W	MATCH	1	KEI1	S. cerevisiae	Kex2-cleavable protein Essential for Inositol phosphorylceramide synthesis	767	YDR367W	S000002775	ORF	Background_List
YAL048C	MATCH	1	GEM1	S. cerevisiae	GTPase EF-hand protein of Mitochondria	1989	YAL048C	S000000046	ORF	Background_List
YLR359W	MATCH	1	ADE13	S. cerevisiae	ADEnine requiring	1449	YLR359W	S000004351	ORF	Background_List
YPR020W	MATCH	1	ATP20	S. cerevisiae	ATP synthase	348	YPR020W	S000006224	ORF	Background_List
YKL029C	MATCH	1	MAE1	S. cerevisiae	MAlic Enzyme	2010	YKL029C	S000001512	ORF	Background_List
YKR038C	MATCH	1	KAE1	S. cerevisiae	Kinase-Associated Endopeptidase	1161	YKR038C	S000001746	ORF	Background_List
YML105C	MATCH	1	SEC65	S. cerevisiae	SECretory	822	YML105C	S000004573	ORF	Background_List
YBR110W	MATCH	1	ALG1	S. cerevisiae	Asparagine-Linked Glycosylation	1350	YBR110W	S000000314	ORF	Background_List
YCL038C	MATCH	1	ATG22	S. cerevisiae	AuTophaGy related	1587	YCL038C	S000000543	ORF	Background_List
YDL226C	MATCH	1	GCS1	S. cerevisiae	Growth Cold Sensitive	1059	YDL226C	S000002385	ORF	Background_List
YOR091W	MATCH	1	TMA46	S. cerevisiae	Translation Machinery Associated	1038	YOR091W	S000005617	ORF	Background_List
YDL007W	MATCH	1	RPT2	S. cerevisiae	Regulatory Particle Triple-A protein, or Regulatory Particle Triphosphatase	1314	YDL007W	S000002165	ORF	Background_List
YHR030C	MATCH	1	SLT2	S. cerevisiae	Suppressor of the LyTic phenotype	1455	YHR030C	S000001072	ORF	Background_List
YDL225W	MATCH	1	SHS1	S. cerevisiae	Seventh Homolog of Septin	1656	YDL225W	S000002384	ORF	Background_List
YJL012C	MATCH	1	VTC4	S. cerevisiae	Vacuolar Transporter Chaperone	2166	YJL012C	S000003549	ORF	Background_List
YBR026C	MATCH	1	ETR1	S. cerevisiae	2-Enoyl Thioester Reductase	1143	YBR026C	S000000230	ORF	Background_List
YDR452W	MATCH	1	PPN1	S. cerevisiae		2025	YDR452W	S000002860	ORF	Background_List
YLR008C	MATCH	1	PAM18	S. cerevisiae	Presequence translocase-Associated Motor	507	YLR008C	S000003998	ORF	Background_List
YNL207W	MATCH	1	RIO2	S. cerevisiae	RIght Open reading frame	1278	YNL207W	S000005151	ORF	Background_List
YBR111C	MATCH	1	YSA1	S. cerevisiae		696	YBR111C	S000000315	ORF	Background_List
YOR051C	MATCH	1	ETT1	S. cerevisiae	Enhancer of Translation Termination 1	1239	YOR051C	S000005577	ORF	Background_List
YDR011W	MATCH	1	SNQ2	S. cerevisiae	Sensitivity to 4-NitroQuinoline-N-oxide	4506	YDR011W	S000002418	ORF	Background_List
YMR194W	MATCH	1	RPL36A	S. cerevisiae	Ribosomal Protein of the Large subunit	766	YMR194W	S000004807	ORF	Background_List
YDR496C	MATCH	1	PUF6	S. cerevisiae	PUmilio-homology domain Family	1971	YDR496C	S000002904	ORF	Background_List
YLR449W	MATCH	1	FPR4	S. cerevisiae	FKBP Proline Rotamase (isomerase)	1179	YLR449W	S000004441	ORF	Background_List
YGL184C	MATCH	1	STR3	S. cerevisiae	Sulfur TRansfer	1398	YGL184C	S000003152	ORF	Background_List
YNL071W	MATCH	1	LAT1	S. cerevisiae		1449	YNL071W	S000005015	ORF	Background_List
YBR249C	MATCH	1	ARO4	S. cerevisiae	AROmatic amino acid requiring	1113	YBR249C	S000000453	ORF	Background_List
YHR070W	MATCH	1	TRM5	S. cerevisiae	tRNA Methyltransferase	1500	YHR070W	S000001112	ORF	Background_List
YCL033C	MATCH	1	MXR2	S. cerevisiae	peptide Methionine sulfoXide Reductase	507	YCL033C	S000000538	ORF	Background_List
YLR401C	MATCH	1	DUS3	S. cerevisiae	DihydroUridine Synthase	2007	YLR401C	S000004393	ORF	Background_List
YLR316C	MATCH	1	TAD3	S. cerevisiae	tRNA-specific Adenosine Deaminase	1093	YLR316C	S000004308	ORF	Background_List
YMR062C	MATCH	1	ARG7	S. cerevisiae	ARGinine requiring	1326	YMR062C	S000004666	ORF	Background_List
YOL130W	MATCH	1	ALR1	S. cerevisiae	ALuminum Resistance	2580	YOL130W	S000005490	ORF	Background_List
YDL090C	MATCH	1	RAM1	S. cerevisiae	RAS protein and A-factor Maturation	1296	YDL090C	S000002248	ORF	Background_List
YIR002C	MATCH	1	MPH1	S. cerevisiae	Mutator PHenotype	2982	YIR002C	S000001441	ORF	Background_List
YML014W	MATCH	1	TRM9	S. cerevisiae	TRna Methyltransferase	840	YML014W	S000004476	ORF	Background_List
YNL070W	MATCH	1	TOM7	S. cerevisiae	Translocase of the Outer Mitochondrial membrane	183	YNL070W	S000005014	ORF	Background_List
YJL053W	MATCH	1	PEP8	S. cerevisiae	carboxyPEPtidase Y-deficient	1140	YJL053W	S000003589	ORF	Background_List
YEL063C	MATCH	1	CAN1	S. cerevisiae	CANavanine resistance	1773	YEL063C	S000000789	ORF	Background_List
YBR111W-A	MATCH	1	SUS1	S. cerevisiae	Sl gene Upstream of ySa1	441	YBR111W-A	S000028510	ORF	Background_List
YGL097W	MATCH	1	SRM1	S. cerevisiae	Suppressor of Receptor Mutations	1449	YGL097W	S000003065	ORF	Background_List
YOR182C	MATCH	1	RPS30B	S. cerevisiae	Ribosomal Protein of the Small subunit	603	YOR182C	S000005708	ORF	Background_List
YDR013W	MATCH	1	PSF1	S. cerevisiae	Partner of Sld Five	627	YDR013W	S000002420	ORF	Background_List
YML102W	MATCH	1	CAC2	S. cerevisiae	Chromatin Assembly Complex	1407	YML102W	S000004570	ORF	Background_List
YBR246W	MATCH	1	RRT2	S. cerevisiae	Regulator of rDNA Transcription	1164	YBR246W	S000000450	ORF	Background_List
YPL109C	MATCH	1	MCO76	S. cerevisiae	Mitochondrial Class One protein of 76 kDa	2126	YPL109C	S000006030	ORF	Background_List
YMR196W	MATCH	1		S. cerevisiae		3267	YMR196W	S000004809	ORF	Background_List
YHR072W	MATCH	1	ERG7	S. cerevisiae	ERGosterol biosynthesis	2196	YHR072W	S000001114	ORF	Background_List
YGR019W	MATCH	1	UGA1	S. cerevisiae	Utilization of GAba	1416	YGR019W	S000003251	ORF	Background_List
YBR029C	MATCH	1	CDS1	S. cerevisiae	CDP-Diacylglycerol Synthase	1374	YBR029C	S000000233	ORF	Background_List
YBR247C	MATCH	1	ENP1	S. cerevisiae	Essential Nuclear Protein	1452	YBR247C	S000000451	ORF	Background_List
YIR004W	MATCH	1	DJP1	S. cerevisiae	DnaJ Protein	1299	YIR004W	S000001443	ORF	Background_List
YPR159W	MATCH	1	KRE6	S. cerevisiae	Killer toxin REsistant	2163	YPR159W	S000006363	ORF	Background_List
YCL035C	MATCH	1	GRX1	S. cerevisiae	GlutaRedoXin	333	YCL035C	S000000540	ORF	Background_List
YDR365C	MATCH	1	ESF1	S. cerevisiae	Eighteen S rRNA Factor	1887	YDR365C	S000002773	ORF	Background_List
YMR197C	MATCH	1	VTI1	S. cerevisiae	Vps10 (Ten) Interacting	654	YMR197C	S000004810	ORF	Background_List
YLR314C	MATCH	1	CDC3	S. cerevisiae	Cell Division Cycle	1563	YLR314C	S000004306	ORF	Background_List
YEL064C	MATCH	1	AVT2	S. cerevisiae	Amino acid Vacuolar Transport	1443	YEL064C	S000000790	ORF	Background_List
YLR229C	MATCH	1	CDC42	S. cerevisiae	Cell Division Cycle	576	YLR229C	S000004219	ORF	Background_List
YLR447C	MATCH	1	VMA6	S. cerevisiae	Vacuolar Membrane Atpase	1038	YLR447C	S000004439	ORF	Background_List
YOL132W	MATCH	1	GAS4	S. cerevisiae	Glycophospholipid-Anchored Surface protein	1416	YOL132W	S000005492	ORF	Background_List
YPR025C	MATCH	1	CCL1	S. cerevisiae		1182	YPR025C	S000006229	ORF	Background_List
YKL203C	MATCH	1	TOR2	S. cerevisiae	Target Of Rapamycin	7425	YKL203C	S000001686	ORF	Background_List
YPR110C	MATCH	1	RPC40	S. cerevisiae	RNA Polymerase C	1008	YPR110C	S000006314	ORF	Background_List
YCR084C	MATCH	1	TUP1	S. cerevisiae	dTMP-UPtake	2142	YCR084C	S000000680	ORF	Background_List
YLR448W	MATCH	1	RPL6B	S. cerevisiae	Ribosomal Protein of the Large subunit	915	YLR448W	S000004440	ORF	Background_List
YPR024W	MATCH	1	YME1	S. cerevisiae	Yeast Mitochondrial Escape	2244	YPR024W	S000006228	ORF	Background_List
YBR114W	MATCH	1	RAD16	S. cerevisiae	RADiation sensitive	2373	YBR114W	S000000318	ORF	Background_List
YGR105W	MATCH	1	VMA21	S. cerevisiae	Vacuolar Membrane Atpase	234	YGR105W	S000003337	ORF	Background_List
YCR083W	MATCH	1	TRX3	S. cerevisiae	ThioRedoXin	384	YCR083W	S000000679	ORF	Background_List
YFR044C	MATCH	1	DUG1	S. cerevisiae	Deficient in Utilization of Glutathione	1446	YFR044C	S000001940	ORF	Background_List
YJL140W	MATCH	1	RPB4	S. cerevisiae	RNA Polymerase B	666	YJL140W	S000003676	ORF	Background_List
YML016C	MATCH	1	PPZ1	S. cerevisiae	Protein Phosphatase Z	2079	YML016C	S000004478	ORF	Background_List
YAL003W	MATCH	1	EFB1	S. cerevisiae	Elongation Factor Beta	987	YAL003W	S000000003	ORF	Background_List
YBR248C	MATCH	1	HIS7	S. cerevisiae	HIStidine requiring	1659	YBR248C	S000000452	ORF	Background_List
YBR115C	MATCH	1	LYS2	S. cerevisiae	LYSine requiring	4179	YBR115C	S000000319	ORF	Background_List
YJL055W	MATCH	1	LOG1	S. cerevisiae	LOnely Guy	738	YJL055W	S000003591	ORF	Background_List
YGL180W	MATCH	1	ATG1	S. cerevisiae	AuTophaGy related	2694	YGL180W	S000003148	ORF	Background_List
YMR283C	MATCH	1	RIT1	S. cerevisiae	Ribosylation of Initiator tRNA	1542	YMR283C	S000004896	ORF	Background_List
YMR150C	MATCH	1	IMP1	S. cerevisiae	Inner Membrane Protease	573	YMR150C	S000004758	ORF	Background_List
YCL009C	MATCH	1	ILV6	S. cerevisiae	IsoLeucine Valine	930	YCL009C	S000000515	ORF	Background_List
YGR029W	MATCH	1	ERV1	S. cerevisiae	Essential for Respiration and Viability	653	YGR029W	S000003261	ORF	Background_List
YBR078W	MATCH	1	ECM33	S. cerevisiae	ExtraCellular Mutant	1620	YBR078W	S000000282	ORF	Background_List
YJR144W	MATCH	1	MGM101	S. cerevisiae	Mitochondrial Genome Maintenance	810	YJR144W	S000003905	ORF	Background_List
YIL069C	MATCH	1	RPS24B	S. cerevisiae	Ribosomal Protein of the Small subunit	817	YIL069C	S000001331	ORF	Background_List
YPL065W	MATCH	1	VPS28	S. cerevisiae	Vacuolar Protein Sorting	729	YPL065W	S000005986	ORF	Background_List
YFL039C	MATCH	1	ACT1	S. cerevisiae	ACTin	1437	YFL039C	S000001855	ORF	Background_List
YNL323W	MATCH	1	LEM3	S. cerevisiae	Ligand-Effect Modulator	1245	YNL323W	S000005267	ORF	Background_List
YBR164C	MATCH	1	ARL1	S. cerevisiae	ADP-Ribosylation factor-Like	552	YBR164C	S000000368	ORF	Background_List
YGR200C	MATCH	1	ELP2	S. cerevisiae	ELongator Protein	2367	YGR200C	S000003432	ORF	Background_List
YML035C	MATCH	1	AMD1	S. cerevisiae	AMP Deaminase	2433	YML035C	S000004498	ORF	Background_List
YNL238W	MATCH	1	KEX2	S. cerevisiae	Killer EXpression defective	2445	YNL238W	S000005182	ORF	Background_List
YER061C	MATCH	1	CEM1	S. cerevisiae	Condensing Enzyme with Mitochondrial function	1329	YER061C	S000000863	ORF	Background_List
YJL138C	MATCH	1	TIF2	S. cerevisiae	Translation Initiation Factor	1188	YJL138C	S000003674	ORF	Background_List
YMR260C	MATCH	1	TIF11	S. cerevisiae	Translation Initiation Factor	462	YMR260C	S000004873	ORF	Background_List
YFL034C-B	MATCH	1	MOB2	S. cerevisiae	Mps One Binder	978	YFL034C-B	S000001859	ORF	Background_List
YJR010W	MATCH	1	MET3	S. cerevisiae	METhionine requiring	1536	YJR010W	S000003771	ORF	Background_List
YBL023C	MATCH	1	MCM2	S. cerevisiae	MiniChromosome Maintenance	2607	YBL023C	S000000119	ORF	Background_List
YDR079C-A	MATCH	1	TFB5	S. cerevisiae		219	YDR079C-A	S000007603	ORF	Background_List
YKL209C	MATCH	1	STE6	S. cerevisiae	STErile	3873	YKL209C	S000001692	ORF	Background_List
YNL104C	MATCH	1	LEU4	S. cerevisiae	LEUcine biosynthesis	1860	YNL104C	S000005048	ORF	Background_List
YIL020C	MATCH	1	HIS6	S. cerevisiae	HIStidine requiring	786	YIL020C	S000001282	ORF	Background_List
YLR418C	MATCH	1	CDC73	S. cerevisiae	Cell Division Cycle	1182	YLR418C	S000004410	ORF	Background_List
YNL237W	MATCH	1	YTP1	S. cerevisiae	Yeast putative Transmembrane Protein	1380	YNL237W	S000005181	ORF	Background_List
YPL199C	MATCH	1		S. cerevisiae		723	YPL199C	S000006120	ORF	Background_List
YBR031W	MATCH	1	RPL4A	S. cerevisiae	Ribosomal Protein of the Large subunit	1089	YBR031W	S000000235	ORF	Background_List
YEL055C	MATCH	1	POL5	S. cerevisiae	POLymerase	3069	YEL055C	S000000781	ORF	Background_List
YMR261C	MATCH	1	TPS3	S. cerevisiae	Trehalose Phosphate Synthase	3165	YMR261C	S000004874	ORF	Background_List
YBR298C	MATCH	1	MAL31	S. cerevisiae	MALtose fermentation	1845	YBR298C	S000000502	ORF	Background_List
YPL151C	MATCH	1	PRP46	S. cerevisiae	Pre-mRNA Processing	1356	YPL151C	S000006072	ORF	Background_List
YFL036W	MATCH	1	RPO41	S. cerevisiae	RNA POlymerase	4056	YFL036W	S000001858	ORF	Background_List
YJR142W	MATCH	1		S. cerevisiae		1029	YJR142W	S000003903	ORF	Background_List
YFR047C	MATCH	1	BNA6	S. cerevisiae	Biosynthesis of Nicotinic Acid	888	YFR047C	S000001943	ORF	Background_List
YGR112W	MATCH	1	SHY1	S. cerevisiae	SURF Homolog of Yeast	1170	YGR112W	S000003344	ORF	Background_List
YBL022C	MATCH	1	PIM1	S. cerevisiae	Proteolysis In Mitochondria	3402	YBL022C	S000000118	ORF	Background_List
YGL106W	MATCH	1	MLC1	S. cerevisiae	Myosin Light Chain	450	YGL106W	S000003074	ORF	Background_List
YOR009W	MATCH	1	TIR4	S. cerevisiae	TIp1-Related	1464	YOR009W	S000005535	ORF	Background_List
YPL196W	MATCH	1	OXR1	S. cerevisiae	OXidation Resistance	822	YPL196W	S000006117	ORF	Background_List
YPL063W	MATCH	1	TIM50	S. cerevisiae	Translocase of the Inner Mitochondrial membrane	1431	YPL063W	S000005984	ORF	Background_List
YJR057W	MATCH	1	CDC8	S. cerevisiae	Cell Division Cycle	651	YJR057W	S000003818	ORF	Background_List
YIL067C	MATCH	1		S. cerevisiae		2037	YIL067C	S000001329	ORF	Background_List
YBR294W	MATCH	1	SUL1	S. cerevisiae	SULfate	2580	YBR294W	S000000498	ORF	Background_List
YCR012W	MATCH	1	PGK1	S. cerevisiae	3-PhosphoGlycerate Kinase	1251	YCR012W	S000000605	ORF	Background_List
YKL033W-A	MATCH	1		S. cerevisiae		711	YKL033W-A	S000007242	ORF	Background_List
YPR074C	MATCH	1	TKL1	S. cerevisiae	TransKetoLase	2043	YPR074C	S000006278	ORF	Background_List
YJR058C	MATCH	1	APS2	S. cerevisiae	clathrin Associated Protein complex Small subunit	444	YJR058C	S000003819	ORF	Background_List
YBR162C	MATCH	1	TOS1	S. cerevisiae	Target Of Sbf	1368	YBR162C	S000000366	ORF	Background_List
YGR246C	MATCH	1	BRF1	S. cerevisiae	B-Related Factor	1791	YGR246C	S000003478	ORF	Background_List
YOR312C	MATCH	1	RPL20B	S. cerevisiae	Ribosomal Protein of the Large subunit	945	YOR312C	S000005839	ORF	Background_List
YNR027W	MATCH	1	BUD17	S. cerevisiae	BUD site selection	954	YNR027W	S000005310	ORF	Background_List
YFL037W	MATCH	1	TUB2	S. cerevisiae	TUBulin	1374	YFL037W	S000001857	ORF	Background_List
YGL105W	MATCH	1	ARC1	S. cerevisiae	Aminoacyl-tRNA synthetase Cofactor	1131	YGL105W	S000003073	ORF	Background_List
YGL238W	MATCH	1	CSE1	S. cerevisiae	Chromosome SEgregation	2883	YGL238W	S000003207	ORF	Background_List
YEL056W	MATCH	1	HAT2	S. cerevisiae	Histone AcetylTransferase	1206	YEL056W	S000000782	ORF	Background_List
YML036W	MATCH	1	CGI121	S. cerevisiae	homolog of human CGI-121	652	YML036W	S000004500	ORF	Background_List
YGR028W	MATCH	1	MSP1	S. cerevisiae	Mitochondrial Sorting of Proteins	1089	YGR028W	S000003260	ORF	Background_List
YML121W	MATCH	1	GTR1	S. cerevisiae	GTp binding protein Resemblance	933	YML121W	S000004590	ORF	Background_List
YFL038C	MATCH	1	YPT1	S. cerevisiae	Yeast Protein Two	621	YFL038C	S000001856	ORF	Background_List
YJL008C	MATCH	1	CCT8	S. cerevisiae	Chaperonin Containing TCP-1	1707	YJL008C	S000003545	ORF	Background_List
YNL102W	MATCH	1	POL1	S. cerevisiae	POLymerase	4407	YNL102W	S000005046	ORF	Background_List
YKL207W	MATCH	1	EMC3	S. cerevisiae	ER Membrane protein Complex	762	YKL207W	S000001690	ORF	Background_List
YNL320W	MATCH	1		S. cerevisiae		855	YNL320W	S000005264	ORF	Background_List
YOR311C	MATCH	1	DGK1	S. cerevisiae	DiacylGlycerol Kinase	873	YOR311C	S000005838	ORF	Background_List
YPR073C	MATCH	1	LTP1	S. cerevisiae	Low molecular weight protein Tyrosine Phosphatase	486	YPR073C	S000006277	ORF	Background_List
YDR304C	MATCH	1	CPR5	S. cerevisiae	Cyclosporin-sensitive Proline Rotamase	678	YDR304C	S000002712	ORF	Background_List
YCL004W	MATCH	1	PGS1	S. cerevisiae	PhosphatidylGlycerolphosphate Synthase	1566	YCL004W	S000000510	ORF	Background_List
YCR011C	MATCH	1	ADP1	S. cerevisiae	ATP-Dependent Permease	3150	YCR011C	S000000604	ORF	Background_List
YGR110W	MATCH	1	CLD1	S. cerevisiae	CardioLipin-specific Deacylase	1338	YGR110W	S000003342	ORF	Background_List
YGR243W	MATCH	1	MPC3	S. cerevisiae	Mitochondrial Pyruvate Carrier	441	YGR243W	S000003475	ORF	Background_List
YML079W	MATCH	1		S. cerevisiae		606	YML079W	S000004544	ORF	Background_List
YMR178W	MATCH	1	FPY1	S. cerevisiae	FAD PYrophosphatase	825	YMR178W	S000004790	ORF	Background_List
YDR128W	MATCH	1	MTC5	S. cerevisiae	Maintenance of Telomere Capping	3447	YDR128W	S000002535	ORF	Background_List
YPR160W	MATCH	1	GPH1	S. cerevisiae	Glycogen PHosphorylase	2709	YPR160W	S000006364	ORF	Background_List
YPL060W	MATCH	1	MFM1	S. cerevisiae	Mrs2 Function Modulating factor	1242	YPL060W	S000005981	ORF	Background_List
YIL065C	MATCH	1	FIS1	S. cerevisiae	mitochondrial FISsion	468	YIL065C	S000001327	ORF	Background_List
YBR252W	MATCH	1	DUT1	S. cerevisiae	DUTp pyrophosphatase	444	YBR252W	S000000456	ORF	Background_List
YAL042W	MATCH	1	ERV46	S. cerevisiae	ER Vesicle	1248	YAL042W	S000000040	ORF	Background_List
YML030W	MATCH	1	RCF1	S. cerevisiae	Respiratory superComplex Factor	480	YML030W	S000004492	ORF	Background_List
YMR131C	MATCH	1	RRB1	S. cerevisiae	Regulator of Ribosome Biogenesis	1536	YMR131C	S000004738	ORF	Background_List
YBR120C	MATCH	1	CBP6	S. cerevisiae	Cytochrome B Protein synthesis	489	YBR120C	S000000324	ORF	Background_List
YGR244C	MATCH	1	LSC2	S. cerevisiae	Ligase of Succinyl-CoA	1284	YGR244C	S000003476	ORF	Background_List
YLR060W	MATCH	1	FRS1	S. cerevisiae	phenylalanyl (F)-tRNA Synthetase	1788	YLR060W	S000004050	ORF	Background_List
YER065C	MATCH	1	ICL1	S. cerevisiae	IsoCitrate Lyase	1674	YER065C	S000000867	ORF	Background_List
YDR129C	MATCH	1	SAC6	S. cerevisiae	Suppressor of ACtin	2040	YDR129C	S000002536	ORF	Background_List
YBR035C	MATCH	1	PDX3	S. cerevisiae	PyriDoXine auxotrophy	687	YBR035C	S000000239	ORF	Background_List
YJR135W-A	MATCH	1	TIM8	S. cerevisiae	Translocase of the Inner Mitochondrial membrane	264	YJR135W-A	S000007348	ORF	Background_List
YFR048W	MATCH	1	RMD8	S. cerevisiae	Required for Meiotic nuclear Division	1989	YFR048W	S000001944	ORF	Background_List
YGR159C	MATCH	1	NSR1	S. cerevisiae		1245	YGR159C	S000003391	ORF	Background_List
YLL055W	MATCH	1	YCT1	S. cerevisiae	Yeast Cysteine Transporter	1596	YLL055W	S000003978	ORF	Background_List
YLR195C	MATCH	1	NMT1	S. cerevisiae	N-Myristoyl Transferase	1368	YLR195C	S000004185	ORF	Background_List
YKR039W	MATCH	1	GAP1	S. cerevisiae	General Amino acid Permease	1809	YKR039W	S000001747	ORF	Background_List
YDR212W	MATCH	1	TCP1	S. cerevisiae	Tailless Complex Polypeptide	1680	YDR212W	S000002620	ORF	Background_List
YDR127W	MATCH	1	ARO1	S. cerevisiae	AROmatic amino acid requiring	4767	YDR127W	S000002534	ORF	Background_List
YNL326C	MATCH	1	PFA3	S. cerevisiae	Protein Fatty Acyltransferase	1011	YNL326C	S000005270	ORF	Background_List
YEL058W	MATCH	1	PCM1	S. cerevisiae	PhosphoaCetylglucosamine Mutase	1674	YEL058W	S000000784	ORF	Background_List
YLL056C	MATCH	1		S. cerevisiae		897	YLL056C	S000003979	ORF	Background_List
YNL108C	MATCH	1		S. cerevisiae		813	YNL108C	S000005052	ORF	Background_List
YOR090C	MATCH	1	PTC5	S. cerevisiae	Phosphatase Two C	1719	YOR090C	S000005616	ORF	Background_List
YPL195W	MATCH	1	APL5	S. cerevisiae	clathrin Adaptor Protein complex Large chain	2799	YPL195W	S000006116	ORF	Background_List
YOR317W	MATCH	1	FAA1	S. cerevisiae	Fatty Acid Activation	2103	YOR317W	S000005844	ORF	Background_List
YIR030C	MATCH	1	DCG1	S. cerevisiae	Dal80p-Controlled Gene	735	YIR030C	S000001469	ORF	Background_List
YER063W	MATCH	1	THO1	S. cerevisiae	suppressor of the Transcriptional defect of Hpr1 by Overexpression	657	YER063W	S000000865	ORF	Background_List
YJL001W	MATCH	1	PRE3	S. cerevisiae	PRoteinase yscE	764	YJL001W	S000003538	ORF	Background_List
YBR121C	MATCH	1	GRS1	S. cerevisiae	Glycyl-tRNA Synthase	2004	YBR121C	S000000325	ORF	Background_List
YGR245C	MATCH	1	SDA1	S. cerevisiae	Severe Depolymerization of Actin	2304	YGR245C	S000003477	ORF	Background_List
YDR346C	MATCH	1	SVF1	S. cerevisiae	SurVival Factor	1446	YDR346C	S000002754	ORF	Background_List
YFR001W	MATCH	1	LOC1	S. cerevisiae	LOCalization of mRNA	615	YFR001W	S000001897	ORF	Background_List
YLR061W	MATCH	1	RPL22A	S. cerevisiae	Ribosomal Protein of the Large subunit	755	YLR061W	S000004051	ORF	Background_List
YBR254C	MATCH	1	TRS20	S. cerevisiae	TRapp Subunit	528	YBR254C	S000000458	ORF	Background_List
YGR027C	MATCH	1	RPS25A	S. cerevisiae	Ribosomal Protein of the Small subunit	327	YGR027C	S000003259	ORF	Background_List
YCR057C	MATCH	1	PWP2	S. cerevisiae	Periodic tryptophan (W) Protein	2772	YCR057C	S000000653	ORF	Background_List
YFR003C	MATCH	1	YPI1	S. cerevisiae	Yeast Phosphatase Inhibitor	468	YFR003C	S000001899	ORF	Background_List
YBL066C	MATCH	1	SEF1	S. cerevisiae	Suppressor of Essential Function	3447	YBL066C	S000000162	ORF	Background_List
YJL003W	MATCH	1	COX16	S. cerevisiae	Cytochrome c OXidase	357	YJL003W	S000003540	ORF	Background_List
YEL011W	MATCH	1	GLC3	S. cerevisiae	GLyCogen	2115	YEL011W	S000000737	ORF	Background_List
YLL057C	MATCH	1	JLP1	S. cerevisiae	dnaJ-Like Protein	1239	YLL057C	S000003980	ORF	Background_List
YLR419W	MATCH	1		S. cerevisiae		4308	YLR419W	S000004411	ORF	Background_List
YLR192C	MATCH	1	HCR1	S. cerevisiae	High-Copy suppressor of Rpg1	798	YLR192C	S000004182	ORF	Background_List
YGR024C	MATCH	1	THG1	S. cerevisiae	tRNAHis Guanylyltransferase	714	YGR024C	S000003256	ORF	Background_List
YNL107W	MATCH	1	YAF9	S. cerevisiae	Yeast homolog of the human leukemogenic protein AF9	681	YNL107W	S000005051	ORF	Background_List
YBR166C	MATCH	1	TYR1	S. cerevisiae	TYRosine	1359	YBR166C	S000000370	ORF	Background_List
YJR052W	MATCH	1	RAD7	S. cerevisiae	RADiation sensitive	1698	YJR052W	S000003813	ORF	Background_List
YDL072C	MATCH	1	YET3	S. cerevisiae	Yeast Endoplasmic reticulum Transmembrane protein	612	YDL072C	S000002230	ORF	Background_List
YLR193C	MATCH	1	UPS1	S. cerevisiae	UnProceSsed	528	YLR193C	S000004183	ORF	Background_List
YMR049C	MATCH	1	ERB1	S. cerevisiae	Eukaryotic Ribosome Biogenesis	2424	YMR049C	S000004652	ORF	Background_List
YDR214W	MATCH	1	AHA1	S. cerevisiae	Activator of Heat shock protein 90 ATPase	1053	YDR214W	S000002622	ORF	Background_List
YEL012W	MATCH	1	UBC8	S. cerevisiae	UBiquitin-Conjugating	780	YEL012W	S000000738	ORF	Background_List
YMR266W	MATCH	1	RSN1	S. cerevisiae	Rescue of Sro7 at high Nacl	2862	YMR266W	S000004879	ORF	Background_List
YNL106C	MATCH	1	INP52	S. cerevisiae	INositol polyphosphate 5-Phosphatase	3552	YNL106C	S000005050	ORF	Background_List
YAL044C	MATCH	1	GCV3	S. cerevisiae	GlyCine cleaVage	513	YAL044C	S000000042	ORF	Background_List
YLL010C	MATCH	1	PSR1	S. cerevisiae	Plasma membrane Sodium Response	1284	YLL010C	S000003933	ORF	Background_List
YIL062C	MATCH	1	ARC15	S. cerevisiae	ARp2/3 Complex subunit	465	YIL062C	S000001324	ORF	Background_List
YDR300C	MATCH	1	PRO1	S. cerevisiae	PROline requiring	1287	YDR300C	S000002708	ORF	Background_List
YJL004C	MATCH	1	SYS1	S. cerevisiae	Suppressor of Ypt Six	612	YJL004C	S000003541	ORF	Background_List
YNL239W	MATCH	1	LAP3	S. cerevisiae	Leucine AminoPeptidases	1365	YNL239W	S000005183	ORF	Background_List
YHR090C	MATCH	1	YNG2	S. cerevisiae	Yeast iNG1 homolog	849	YHR090C	S000001132	ORF	Background_List
YBR034C	MATCH	1	HMT1	S. cerevisiae	HnRNP MethylTransferase	1047	YBR034C	S000000238	ORF	Background_List
YGR021W	MATCH	1	DPC29	S. cerevisiae	Delta-Psi dependent mitochondrial import and Cleavage protein of ~29 kDa	873	YGR021W	S000003253	ORF	Background_List
YMR267W	MATCH	1	PPA2	S. cerevisiae	PyroPhosphatAse	933	YMR267W	S000004880	ORF	Background_List
YOL129W	MATCH	1	VPS68	S. cerevisiae	Vacuolar Protein Sorting	555	YOL129W	S000005489	ORF	Background_List
YFL030W	MATCH	1	AGX1	S. cerevisiae	Alanine:Glyoxylate aminotrans(X)ferase	1158	YFL030W	S000001864	ORF	Background_List
YOR136W	MATCH	1	IDH2	S. cerevisiae	Isocitrate DeHydrogenase	1110	YOR136W	S000005662	ORF	Background_List
YEL013W	MATCH	1	VAC8	S. cerevisiae	VACuole related	1737	YEL013W	S000000739	ORF	Background_List
YHR007C	MATCH	1	ERG11	S. cerevisiae	ERGosterol biosynthesis	1593	YHR007C	S000001049	ORF	Background_List
YKR080W	MATCH	1	MTD1	S. cerevisiae	Methylene Tetrahydrafolate Dehydrogenase	963	YKR080W	S000001788	ORF	Background_List
YLR197W	MATCH	1	NOP56	S. cerevisiae	NucleOlar Protein of 56.8 kDa	1515	YLR197W	S000004187	ORF	Background_List
YOR002W	MATCH	1	ALG6	S. cerevisiae	Asparagine-Linked Glycosylation	1635	YOR002W	S000005528	ORF	Background_List
YGR240C	MATCH	1	PFK1	S. cerevisiae	PhosphoFructoKinase	2964	YGR240C	S000003472	ORF	Background_List
YDL161W	MATCH	1	ENT1	S. cerevisiae	Epsin N-Terminal homology	1365	YDL161W	S000002320	ORF	Background_List
YML075C	MATCH	1	HMG1	S. cerevisiae	3-Hydroxy-3-MethylGlutaryl-coenzyme a reductase	3165	YML075C	S000004540	ORF	Background_List
YKR081C	MATCH	1	RPF2	S. cerevisiae	Ribosome Production Factor	1035	YKR081C	S000001789	ORF	Background_List
YPL110C	MATCH	1	GDE1	S. cerevisiae	GlycerophosphoDiEsterase	3672	YPL110C	S000006031	ORF	Background_List
YDR083W	MATCH	1	RRP8	S. cerevisiae	Ribosomal RNA Processing	1179	YDR083W	S000002490	ORF	Background_List
YGL232W	MATCH	1	TAN1	S. cerevisiae	Trna AcetylatioN	928	YGL232W	S000003201	ORF	Background_List
YDR529C	MATCH	1	QCR7	S. cerevisiae	ubiQuinol-cytochrome C oxidoReductase	384	YDR529C	S000002937	ORF	Background_List
YFR004W	MATCH	1	RPN11	S. cerevisiae	Regulatory Particle Non-ATPase	921	YFR004W	S000001900	ORF	Background_List
YLL011W	MATCH	1	SOF1	S. cerevisiae	Suppressor Of Fibrillarin	1470	YLL011W	S000003934	ORF	Background_List
YNL011C	MATCH	1		S. cerevisiae		1335	YNL011C	S000004956	ORF	Background_List
YLR284C	MATCH	1	ECI1	S. cerevisiae	Enoyl-CoA Isomerase	843	YLR284C	S000004274	ORF	Background_List
YJR104C	MATCH	1	SOD1	S. cerevisiae	SuperOxide Dismutase	465	YJR104C	S000003865	ORF	Background_List
YMR002W	MATCH	1	MIX17	S. cerevisiae	Mitochondrial Intermembrane space CX(n)C motif protein	471	YMR002W	S000004604	ORF	Background_List
YNL059C	MATCH	1	ARP5	S. cerevisiae	Actin-Related Protein	2268	YNL059C	S000005004	ORF	Background_List
YMR220W	MATCH	1	ERG8	S. cerevisiae	ERGosterol biosynthesis	1356	YMR220W	S000004833	ORF	Background_List
YPL111W	MATCH	1	CAR1	S. cerevisiae	Catabolism of ARginine	1002	YPL111W	S000006032	ORF	Background_List
YHR008C	MATCH	1	SOD2	S. cerevisiae	SuperOxide Dismutase	702	YHR008C	S000001050	ORF	Background_List
YOR001W	MATCH	1	RRP6	S. cerevisiae	Ribosomal RNA Processing	2202	YOR001W	S000005527	ORF	Background_List
YNL277W	MATCH	1	MET2	S. cerevisiae	METhionine requiring	1461	YNL277W	S000005221	ORF	Background_List
YGR289C	MATCH	1	MAL11	S. cerevisiae	MALtose fermentation	1851	YGR289C	S000003521	ORF	Background_List
YMR221C	MATCH	1	FMP42	S. cerevisiae	Found in Mitochondrial Proteome	1515	YMR221C	S000004834	ORF	Background_List
YJL091C	MATCH	1	GWT1	S. cerevisiae	GPI-anchored Wall protein Transfer	1473	YJL091C	S000003627	ORF	Background_List
YIL111W	MATCH	1	COX5B	S. cerevisiae	Cytochrome c OXidase	544	YIL111W	S000001373	ORF	Background_List
YDL160C	MATCH	1	DHH1	S. cerevisiae	DEAD box Helicase Homolog	1521	YDL160C	S000002319	ORF	Background_List
YNR020C	MATCH	1	ATP23	S. cerevisiae		813	YNR020C	S000005303	ORF	Background_List
YHR009C	MATCH	1	TDA3	S. cerevisiae	Topoisomerase I Damage Affected	1572	YHR009C	S000001051	ORF	Background_List
YDR170C	MATCH	1	SEC7	S. cerevisiae	SECretory	6030	YDR170C	S000002577	ORF	Background_List
YFR006W	MATCH	1		S. cerevisiae		1608	YFR006W	S000001902	ORF	Background_List
YDR086C	MATCH	1	SSS1	S. cerevisiae	Sec Sixty-one Suppressor	243	YDR086C	S000002493	ORF	Background_List
YPL023C	MATCH	1	MET12	S. cerevisiae	METhionine requiring	1974	YPL023C	S000005944	ORF	Background_List
YLR438C-A	MATCH	1	LSM3	S. cerevisiae	Like SM	270	YLR438C-A	S000006434	ORF	Background_List
YNL010W	MATCH	1	PYP1	S. cerevisiae	PolYol Phosphatase	726	YNL010W	S000004955	ORF	Background_List
YGR020C	MATCH	1	VMA7	S. cerevisiae	Vacuolar Membrane Atpase	357	YGR020C	S000003252	ORF	Background_List
YER152C	MATCH	1		S. cerevisiae		1332	YER152C	S000000954	ORF	Background_List
YGR286C	MATCH	1	BIO2	S. cerevisiae	BIOtin	1128	YGR286C	S000003518	ORF	Background_List
YGL012W	MATCH	1	ERG4	S. cerevisiae	ERGosterol biosynthesis	1422	YGL012W	S000002980	ORF	Background_List
YIL110W	MATCH	1	HPM1	S. cerevisiae	Histidine Protein Methyltransferase	1134	YIL110W	S000001372	ORF	Background_List
YJR017C	MATCH	1	ESS1	S. cerevisiae	ESSential	513	YJR017C	S000003778	ORF	Background_List
YNL141W	MATCH	1	AAH1	S. cerevisiae	Adenine AminoHydrolase	1044	YNL141W	S000005085	ORF	Background_List
YJR101W	MATCH	1	RSM26	S. cerevisiae	Ribosomal Small subunit of Mitochondria	801	YJR101W	S000003862	ORF	Background_List
YMR138W	MATCH	1	CIN4	S. cerevisiae	Chromosome INstability	576	YMR138W	S000004746	ORF	Background_List
YNL142W	MATCH	1	MEP2	S. cerevisiae		1500	YNL142W	S000005086	ORF	Background_List
YNL275W	MATCH	1	BOR1	S. cerevisiae	BORon transporter	1731	YNL275W	S000005219	ORF	Background_List
YOR132W	MATCH	1	VPS17	S. cerevisiae	Vacuolar Protein Sorting	1656	YOR132W	S000005658	ORF	Background_List
YOR048C	MATCH	1	RAT1	S. cerevisiae	Ribonucleic Acid Trafficking	3021	YOR048C	S000005574	ORF	Background_List
YGL059W	MATCH	1	PKP2	S. cerevisiae	Protein Kinase of PDH	1476	YGL059W	S000003027	ORF	Background_List
YGR287C	MATCH	1	IMA1	S. cerevisiae	IsoMAltase	1770	YGR287C	S000003519	ORF	Background_List
YLR196W	MATCH	1	PWP1	S. cerevisiae	Periodic tryptophan (W) Protein	1731	YLR196W	S000004186	ORF	Background_List
YCR019W	MATCH	1	MAK32	S. cerevisiae	MAintenance of Killer	1092	YCR019W	S000000612	ORF	Background_List
YJR016C	MATCH	1	ILV3	S. cerevisiae	IsoLeucine-plus-Valine requiring	1758	YJR016C	S000003777	ORF	Background_List
YGL019W	MATCH	1	CKB1	S. cerevisiae	Casein Kinase Beta subunit	837	YGL019W	S000002987	ORF	Background_List
YMR224C	MATCH	1	MRE11	S. cerevisiae	Meiotic REcombination	2079	YMR224C	S000004837	ORF	Background_List
YDL166C	MATCH	1	FAP7	S. cerevisiae	Factor Activating Pos9	594	YDL166C	S000002325	ORF	Background_List
YHR002W	MATCH	1	LEU5	S. cerevisiae	LEUcine biosynthesis	1074	YHR002W	S000001044	ORF	Background_List
YDL033C	MATCH	1	SLM3	S. cerevisiae	Synthetic Lethal with Mss4	1254	YDL033C	S000002191	ORF	Background_List
YNL149C	MATCH	1	PGA2	S. cerevisiae	Processing of Gas1p and ALP	390	YNL149C	S000005093	ORF	Background_List
YML070W	MATCH	1	DAK1	S. cerevisiae	DihydroxyAcetone Kinase	1755	YML070W	S000004535	ORF	Background_List
YMR139W	MATCH	1	RIM11	S. cerevisiae	Regulator of IME2	1113	YMR139W	S000004747	ORF	Background_List
YGR284C	MATCH	1	ERV29	S. cerevisiae	ER Vesicle	933	YGR284C	S000003516	ORF	Background_List
YBL027W	MATCH	1	RPL19B	S. cerevisiae	Ribosomal Protein of the Large subunit	954	YBL027W	S000000123	ORF	Background_List
YNL101W	MATCH	1	AVT4	S. cerevisiae	Amino acid Vacuolar Transport	2142	YNL101W	S000005045	ORF	Background_List
YPL069C	MATCH	1	BTS1	S. cerevisiae	Bet Two Suppressor	1008	YPL069C	S000005990	ORF	Background_List
YOR310C	MATCH	1	NOP58	S. cerevisiae	NucleOlar Protein of 58 kDa	1536	YOR310C	S000005837	ORF	Background_List
YGL103W	MATCH	1	RPL28	S. cerevisiae	Ribosomal Protein of the Large subunit	961	YGL103W	S000003071	ORF	Background_List
YLR069C	MATCH	1	MEF1	S. cerevisiae	Mitochondrial Elongation Factor	2286	YLR069C	S000004059	ORF	Background_List
YER110C	MATCH	1	KAP123	S. cerevisiae	KAryoPherin	3342	YER110C	S000000912	ORF	Background_List
YOR007C	MATCH	1	SGT2	S. cerevisiae	Small Glutamine-rich Tetratricopeptide repeat-containing protein	1041	YOR007C	S000005533	ORF	Background_List
YPL154C	MATCH	1	PEP4	S. cerevisiae	carboxyPEPtidase Y-deficient	1218	YPL154C	S000006075	ORF	Background_List
YKL164C	MATCH	1	PIR1	S. cerevisiae	Protein containing Internal Repeats	1026	YKL164C	S000001647	ORF	Background_List
YMR310C	MATCH	1		S. cerevisiae		954	YMR310C	S000004927	ORF	Background_List
YMR225C	MATCH	1	MRPL44	S. cerevisiae	Mitochondrial Ribosomal Protein, Large subunit	444	YMR225C	S000004838	ORF	Background_List
YLR022C	MATCH	1	SDO1	S. cerevisiae		753	YLR022C	S000004012	ORF	Background_List
YGR199W	MATCH	1	PMT6	S. cerevisiae	Protein O-MannosylTransferase	2280	YGR199W	S000003431	ORF	Background_List
YKL078W	MATCH	1	DHR2	S. cerevisiae	DEAH-box RNA helicase	2208	YKL078W	S000001561	ORF	Background_List
YJR014W	MATCH	1	TMA22	S. cerevisiae	Translation Machinery Associated	597	YJR014W	S000003775	ORF	Background_List
YKL163W	MATCH	1	PIR3	S. cerevisiae	Protein containing Internal Repeats	978	YKL163W	S000001646	ORF	Background_List
YPL022W	MATCH	1	RAD1	S. cerevisiae	RADiation sensitive	3303	YPL022W	S000005943	ORF	Background_List
YER023W	MATCH	1	PRO3	S. cerevisiae	PROline requiring	861	YER023W	S000000825	ORF	Background_List
YNL015W	MATCH	1	PBI2	S. cerevisiae	Proteinase B Inhibitor	228	YNL015W	S000004960	ORF	Background_List
YBR160W	MATCH	1	CDC28	S. cerevisiae	Cell Division Cycle	897	YBR160W	S000000364	ORF	Background_List
YBR293W	MATCH	1	VBA2	S. cerevisiae	Vacuolar Basic Amino acid transporter	1425	YBR293W	S000000497	ORF	Background_List
YCR028C-A	MATCH	1	RIM1	S. cerevisiae	Replication In Mitochondria	491	YCR028C-A	S000007222	ORF	Background_List
YOR223W	MATCH	1	DSC3	S. cerevisiae	Defective for SREBP Cleavage	879	YOR223W	S000005749	ORF	Background_List
YFR009W	MATCH	1	GCN20	S. cerevisiae	General Control Nonderepressible	2259	YFR009W	S000001905	ORF	Background_List
YGR285C	MATCH	1	ZUO1	S. cerevisiae	ZUOtin	1302	YGR285C	S000003517	ORF	Background_List
YGL236C	MATCH	1	MTO1	S. cerevisiae	Mitochondrial Translation Optimization	2010	YGL236C	S000003205	ORF	Background_List
YBL026W	MATCH	1	LSM2	S. cerevisiae	Like SM	416	YBL026W	S000000122	ORF	Background_List
YJR100C	MATCH	1	AIM25	S. cerevisiae	Altered Inheritance of Mitochondria	984	YJR100C	S000003861	ORF	Background_List
YAR007C	MATCH	1	RFA1	S. cerevisiae	Replication Factor A	1866	YAR007C	S000000065	ORF	Background_List
YOR006C	MATCH	1	TSR3	S. cerevisiae	Twenty S rRNA accumulation	942	YOR006C	S000005532	ORF	Background_List
YLR372W	MATCH	1	ELO3	S. cerevisiae	fatty acid ELOngation	1038	YLR372W	S000004364	ORF	Background_List
YOR357C	MATCH	1	SNX3	S. cerevisiae	Sorting NeXin	489	YOR357C	S000005884	ORF	Background_List
YDR306C	MATCH	1	PFU1	S. cerevisiae	Pheromone, F-box, Ubiquitination	1437	YDR306C	S000002714	ORF	Background_List
YOR224C	MATCH	1	RPB8	S. cerevisiae	RNA Polymerase B	441	YOR224C	S000005750	ORF	Background_List
YLR370C	MATCH	1	ARC18	S. cerevisiae	ARp2/3 Complex subunit	537	YLR370C	S000004362	ORF	Background_List
YMR008C	MATCH	1	PLB1	S. cerevisiae	PhosphoLipase B	1995	YMR008C	S000004610	ORF	Background_List
YMR226C	MATCH	1		S. cerevisiae		804	YMR226C	S000004839	ORF	Background_List
YDL085C-A	MATCH	1		S. cerevisiae		207	YDL085C-A	S000007588	ORF	Background_List
YIL022W	MATCH	1	TIM44	S. cerevisiae	Translocase of the Inner Mitochondrial membrane	1296	YIL022W	S000001284	ORF	Background_List
YPL152W	MATCH	1	RRD2	S. cerevisiae	Resistant to Rapamycin Deletion	1077	YPL152W	S000006073	ORF	Background_List
YOR356W	MATCH	1	CIR2	S. cerevisiae	Changed Intracellular Redox state	1896	YOR356W	S000005883	ORF	Background_List
YCR017C	MATCH	1	CWH43	S. cerevisiae	Calcofluor White Hypersensitive	2862	YCR017C	S000000610	ORF	Background_List
YJR013W	MATCH	1	GPI14	S. cerevisiae	GlycosylPhosphatidylInositol anchor biosynthesis	1212	YJR013W	S000003774	ORF	Background_List
YDL164C	MATCH	1	CDC9	S. cerevisiae	Cell Division Cycle	2268	YDL164C	S000002323	ORF	Background_List
YNL147W	MATCH	1	LSM7	S. cerevisiae	Like SM	444	YNL147W	S000005091	ORF	Background_List
YHR005C	MATCH	1	GPA1	S. cerevisiae	G Protein Alpha subunit	1419	YHR005C	S000001047	ORF	Background_List
YNL014W	MATCH	1	HEF3	S. cerevisiae	Homolog of EF-3	3135	YNL014W	S000004959	ORF	Background_List
YLR066W	MATCH	1	SPC3	S. cerevisiae	Signal Peptidase Complex	555	YLR066W	S000004056	ORF	Background_List
YER156C	MATCH	1	MYG1	S. cerevisiae		1017	YER156C	S000000958	ORF	Background_List
YOR222W	MATCH	1	ODC2	S. cerevisiae	OxoDicarboxylate Carrier	924	YOR222W	S000005748	ORF	Background_List
YNL232W	MATCH	1	CSL4	S. cerevisiae	Cep1 Synthetic Lethal	879	YNL232W	S000005176	ORF	Background_List
YGR282C	MATCH	1	BGL2	S. cerevisiae	Beta-GLucanase	942	YGR282C	S000003514	ORF	Background_List
YGL234W	MATCH	1	ADE5,7	S. cerevisiae	ADEnine requiring	2409	YGL234W	S000003203	ORF	Background_List
YGR281W	MATCH	1	YOR1	S. cerevisiae	Yeast Oligomycin Resistance	4434	YGR281W	S000003513	ORF	Background_List
YDR308C	MATCH	1	SRB7	S. cerevisiae	Suppressor of RNA polymerase B	423	YDR308C	S000002716	ORF	Background_List
YNL231C	MATCH	1	PDR16	S. cerevisiae	Pleiotropic Drug Resistance	1056	YNL231C	S000005175	ORF	Background_List
YLL018C	MATCH	1	DPS1	S. cerevisiae		1674	YLL018C	S000003941	ORF	Background_List
YIL021W	MATCH	1	RPB3	S. cerevisiae	RNA Polymerase B	957	YIL021W	S000001283	ORF	Background_List
YLR153C	MATCH	1	ACS2	S. cerevisiae	Acetyl CoA Synthetase	2052	YLR153C	S000004143	ORF	Background_List
YBR291C	MATCH	1	CTP1	S. cerevisiae	Citrate Transport Protein	900	YBR291C	S000000495	ORF	Background_List
YER069W	MATCH	1	ARG5,6	S. cerevisiae	ARGinine requiring	2592	YER069W	S000000871	ORF	Background_List
YOR004W	MATCH	1	UTP23	S. cerevisiae	U Three-associated Protein	765	YOR004W	S000005530	ORF	Background_List
YIL155C	MATCH	1	GUT2	S. cerevisiae	Glycerol UTilization	1950	YIL155C	S000001417	ORF	Background_List
YER021W	MATCH	1	RPN3	S. cerevisiae	Regulatory Particle Non-ATPase	1572	YER021W	S000000823	ORF	Background_List
YBR073W	MATCH	1	RDH54	S. cerevisiae	RaD54 Homolog	2877	YBR073W	S000000277	ORF	Background_List
YLR285W	MATCH	1	NNT1	S. cerevisiae	Nicotinamide N-methylTransferase	786	YLR285W	S000004275	ORF	Background_List
YDL031W	MATCH	1	DBP10	S. cerevisiae	Dead Box Protein	2988	YDL031W	S000002189	ORF	Background_List
YMR009W	MATCH	1	ADI1	S. cerevisiae	Acireductone DIoxygenase	540	YMR009W	S000004611	ORF	Background_List
YBL024W	MATCH	1	NCL1	S. cerevisiae	NuCLear protein	2055	YBL024W	S000000120	ORF	Background_List
YGL148W	MATCH	1	ARO2	S. cerevisiae	AROmatic amino acid requiring	1131	YGL148W	S000003116	ORF	Background_List
YGL100W	MATCH	1	SEH1	S. cerevisiae	SEc13 Homolog	1050	YGL100W	S000003068	ORF	Background_List
YPL153C	MATCH	1	RAD53	S. cerevisiae	RADiation sensitive	2466	YPL153C	S000006074	ORF	Background_List
YJR094W-A	MATCH	1	RPL43B	S. cerevisiae	Ribosomal Protein of the Large subunit	554	YJR094W-A	S000003855	ORF	Background_List
YHR179W	MATCH	1	OYE2	S. cerevisiae	Old Yellow Enzyme	1203	YHR179W	S000001222	ORF	Background_List
YNL064C	MATCH	1	YDJ1	S. cerevisiae	Yeast dnaJ	1230	YNL064C	S000005008	ORF	Background_List
YOR261C	MATCH	1	RPN8	S. cerevisiae	Regulatory Particle Non-ATPase	1017	YOR261C	S000005787	ORF	Background_List
YMR313C	MATCH	1	TGL3	S. cerevisiae	TriacylGlycerol Lipase	1929	YMR313C	S000004930	ORF	Background_List
YNL281W	MATCH	1	HCH1	S. cerevisiae	High-Copy Hsp90 suppressor	462	YNL281W	S000005225	ORF	Background_List
YCL040W	MATCH	1	GLK1	S. cerevisiae	GLucoKinase	1503	YCL040W	S000000545	ORF	Background_List
YPL119C	MATCH	1	DBP1	S. cerevisiae	Dead Box Protein	1854	YPL119C	S000006040	ORF	Background_List
YCR094W	MATCH	1	CDC50	S. cerevisiae	Cell Division Cycle	1176	YCR094W	S000000690	ORF	Background_List
YER017C	MATCH	1	AFG3	S. cerevisiae	ATPase Family Gene	2286	YER017C	S000000819	ORF	Background_List
YHR132C	MATCH	1	ECM14	S. cerevisiae	ExtraCellular Mutant	1293	YHR132C	S000001174	ORF	Background_List
YPR125W	MATCH	1	YLH47	S. cerevisiae	Yeast LETM1 Homolog of 47 kD	1365	YPR125W	S000006329	ORF	Background_List
YLR146C	MATCH	1	SPE4	S. cerevisiae	SPErmidine auxotroph	903	YLR146C	S000004136	ORF	Background_List
YDR394W	MATCH	1	RPT3	S. cerevisiae	Regulatory Particle Triple-A protein, or Regulatory Particle Triphosphatase	1287	YDR394W	S000002802	ORF	Background_List
YMR229C	MATCH	1	RRP5	S. cerevisiae	Ribosomal RNA Processing	5190	YMR229C	S000004842	ORF	Background_List
YPL204W	MATCH	1	HRR25	S. cerevisiae	HO and Radiation Repair	1485	YPL204W	S000006125	ORF	Background_List
YJL171C	MATCH	1	TOH1	S. cerevisiae	TOS One Homolog	1191	YJL171C	S000003707	ORF	Background_List
YOR175C	MATCH	1	ALE1	S. cerevisiae	Acyltransferase for Lyso-phosphatidylEthanolamine	1860	YOR175C	S000005701	ORF	Background_List
YER148W	MATCH	1	SPT15	S. cerevisiae	SuPpressor of Ty insertions	723	YER148W	S000000950	ORF	Background_List
YER100W	MATCH	1	UBC6	S. cerevisiae	UBiquitin-Conjugating	753	YER100W	S000000902	ORF	Background_List
YLR364W	MATCH	1	GRX8	S. cerevisiae	GlutaRedoXin	330	YLR364W	S000004356	ORF	Background_List
YHL039W	MATCH	1	EFM1	S. cerevisiae	Elongation Factor Methyltransferase	1758	YHL039W	S000001031	ORF	Background_List
YKL035W	MATCH	1	UGP1	S. cerevisiae	UDP-glucose pyrophosphorylase	1500	YKL035W	S000001518	ORF	Background_List
YMR314W	MATCH	1	PRE5	S. cerevisiae	PRoteinase yscE	705	YMR314W	S000004931	ORF	Background_List
YBR218C	MATCH	1	PYC2	S. cerevisiae	PYruvate Carboxylase	3543	YBR218C	S000000422	ORF	Background_List
YOL122C	MATCH	1	SMF1	S. cerevisiae	Suppressor of Mitochondria import Function	1728	YOL122C	S000005482	ORF	Background_List
YLL008W	MATCH	1	DRS1	S. cerevisiae	Deficiency of Ribosomal Subunits	2259	YLL008W	S000003931	ORF	Background_List
YLR147C	MATCH	1	SMD3	S. cerevisiae		306	YLR147C	S000004137	ORF	Background_List
YGR292W	MATCH	1	MAL12	S. cerevisiae	MALtose fermentation	1755	YGR292W	S000003524	ORF	Background_List
YKL165C	MATCH	1	MCD4	S. cerevisiae	Morphogenesis Checkpoint Dependent	2760	YKL165C	S000001648	ORF	Background_List
YAR003W	MATCH	1	SWD1	S. cerevisiae	Set1c, WD40 repeat protein	1281	YAR003W	S000000064	ORF	Background_List
YLR144C	MATCH	1	ACF2	S. cerevisiae	Assembly Complementing Factor	2340	YLR144C	S000004134	ORF	Background_List
YNL062C	MATCH	1	GCD10	S. cerevisiae	General Control Derepressed	1437	YNL062C	S000005006	ORF	Background_List
YLR277C	MATCH	1	YSH1	S. cerevisiae	Yeast Seventy-three Homolog	2340	YLR277C	S000004267	ORF	Background_List
YOL038W	MATCH	1	PRE6	S. cerevisiae	PRoteinase yscE	765	YOL038W	S000005398	ORF	Background_List
YKR042W	MATCH	1	UTH1	S. cerevisiae	yoUTH	1098	YKR042W	S000001750	ORF	Background_List
YNL061W	MATCH	1	NOP2	S. cerevisiae	NucleOlar Protein	1857	YNL061W	S000005005	ORF	Background_List
YER014W	MATCH	1	HEM14	S. cerevisiae	HEMe biosynthesis	1620	YER014W	S000000816	ORF	Background_List
YGL065C	MATCH	1	ALG2	S. cerevisiae	Asparagine-Linked Glycosylation	1512	YGL065C	S000003033	ORF	Background_List
YBR214W	MATCH	1	SDS24	S. cerevisiae	homolog of S. pombe SDS23	1584	YBR214W	S000000418	ORF	Background_List
YCL043C	MATCH	1	PDI1	S. cerevisiae	Protein Disulfide Isomerase	1569	YCL043C	S000000548	ORF	Background_List
YKR043C	MATCH	1	SHB17	S. cerevisiae	SedoHeptulose 1,7-Bisphosphatase	816	YKR043C	S000001751	ORF	Background_List
YPR127W	MATCH	1		S. cerevisiae		1038	YPR127W	S000006331	ORF	Background_List
YMR315W	MATCH	1		S. cerevisiae		1050	YMR315W	S000004932	ORF	Background_List
YDR264C	MATCH	1	AKR1	S. cerevisiae	AnKyrin Repeat containing	2295	YDR264C	S000002672	ORF	Background_List
YDR397C	MATCH	1	NCB2	S. cerevisiae	Negative Cofactor B	533	YDR397C	S000002805	ORF	Background_List
YJL087C	MATCH	1	TRL1	S. cerevisiae	tRNA Ligase	2484	YJL087C	S000003623	ORF	Background_List
YLR059C	MATCH	1	REX2	S. cerevisiae	Rna EXonuclease	810	YLR059C	S000004049	ORF	Background_List
YNL280C	MATCH	1	ERG24	S. cerevisiae	ERGosterol biosynthesis	1317	YNL280C	S000005224	ORF	Background_List
YOR089C	MATCH	1	VPS21	S. cerevisiae	Vacuolar Protein Sorting	633	YOR089C	S000005615	ORF	Background_List
YDR044W	MATCH	1	HEM13	S. cerevisiae	HEMe biosynthesis	987	YDR044W	S000002451	ORF	Background_List
YBR162W-A	MATCH	1	YSY6	S. cerevisiae		198	YBR162W-A	S000002158	ORF	Background_List
YDR177W	MATCH	1	UBC1	S. cerevisiae	UBiquitin-Conjugating	648	YDR177W	S000002584	ORF	Background_List
YER013W	MATCH	1	PRP22	S. cerevisiae	Pre-mRNA Processing	3438	YER013W	S000000815	ORF	Background_List
YHR001W	MATCH	1	OSH7	S. cerevisiae	OxySterol binding protein Homolog	1314	YHR001W	S000001043	ORF	Background_List
YER146W	MATCH	1	LSM5	S. cerevisiae	Like SM	282	YER146W	S000000948	ORF	Background_List
YGL064C	MATCH	1	MRH4	S. cerevisiae	Mitochondrial RNA Helicase	1686	YGL064C	S000003032	ORF	Background_List
YDR481C	MATCH	1	PHO8	S. cerevisiae	PHOsphate metabolism	1701	YDR481C	S000002889	ORF	Background_List
YJL172W	MATCH	1	CPS1	S. cerevisiae	CarboxyPeptidase yscS	1731	YJL172W	S000003708	ORF	Background_List
YDL120W	MATCH	1	YFH1	S. cerevisiae	Yeast Frataxin Homolog	525	YDL120W	S000002278	ORF	Background_List
YNR070W	MATCH	1	PDR18	S. cerevisiae	Pleiotropic Drug Resistance	4002	YNR070W	S000005353	ORF	Background_List
YPL117C	MATCH	1	IDI1	S. cerevisiae	Isopentenyl Diphosphate Isomerase	867	YPL117C	S000006038	ORF	Background_List
YOR087W	MATCH	1	YVC1	S. cerevisiae	Yeast Vacuolar Conductance	2028	YOR087W	S000005613	ORF	Background_List
YDR045C	MATCH	1	RPC11	S. cerevisiae	RNA Polymerase C	333	YDR045C	S000002452	ORF	Background_List
YOL124C	MATCH	1	TRM11	S. cerevisiae	TRna Methyltransferase	1302	YOL124C	S000005484	ORF	Background_List
YDL168W	MATCH	1	SFA1	S. cerevisiae	Sensitive to FormAldehyde	1161	YDL168W	S000002327	ORF	Background_List
YGL196W	MATCH	1	DSD1	S. cerevisiae		1287	YGL196W	S000003164	ORF	Background_List
YNL153C	MATCH	1	GIM3	S. cerevisiae	Gene Involved in Microtubule biogenesis	390	YNL153C	S000005097	ORF	Background_List
YJL081C	MATCH	1	ARP4	S. cerevisiae	Actin-Related Protein	1470	YJL081C	S000003617	ORF	Background_List
YPL029W	MATCH	1	SUV3	S. cerevisiae	SUppressor of Var1	2214	YPL029W	S000005950	ORF	Background_List
YHR042W	MATCH	1	NCP1	S. cerevisiae	NADP-Cytochrome P450 reductase	2076	YHR042W	S000001084	ORF	Background_List
YDR390C	MATCH	1	UBA2	S. cerevisiae	UBiquitin Activating	1911	YDR390C	S000002798	ORF	Background_List
YDR040C	MATCH	1	ENA1	S. cerevisiae	Exitus NAtru (Latin, "exit sodium")	3276	YDR040C	S000002447	ORF	Background_List
YDR173C	MATCH	1	ARG82	S. cerevisiae	ARGinine requiring	1068	YDR173C	S000002580	ORF	Background_List
YDL126C	MATCH	1	CDC48	S. cerevisiae	Cell Division Cycle	2508	YDL126C	S000002284	ORF	Background_List
YLR234W	MATCH	1	TOP3	S. cerevisiae	TOPoisomerase	1971	YLR234W	S000004224	ORF	Background_List
YIL118W	MATCH	1	RHO3	S. cerevisiae	Ras HOmolog	696	YIL118W	S000001380	ORF	Background_List
YDR172W	MATCH	1	SUP35	S. cerevisiae	SUPpressor	2058	YDR172W	S000002579	ORF	Background_List
YDL210W	MATCH	1	UGA4	S. cerevisiae	Utilization of GAba	1716	YDL210W	S000002369	ORF	Background_List
YGL022W	MATCH	1	STT3	S. cerevisiae	STaurosporine and Temperature sensitive	2157	YGL022W	S000002990	ORF	Background_List
YBR089C-A	MATCH	1	NHP6B	S. cerevisiae	Non-Histone Protein	300	YBR089C-A	S000002157	ORF	Background_List
YOR131C	MATCH	1		S. cerevisiae		657	YOR131C	S000005657	ORF	Background_List
YER019W	MATCH	1	ISC1	S. cerevisiae	Inositol phosphoSphingolipid phospholipase C	1434	YER019W	S000000821	ORF	Background_List
YMR318C	MATCH	1	ADH6	S. cerevisiae	Alcohol DeHydrogenase	1083	YMR318C	S000004937	ORF	Background_List
YKL039W	MATCH	1	PTM1	S. cerevisiae		1572	YKL039W	S000001522	ORF	Background_List
YLR017W	MATCH	1	MEU1	S. cerevisiae	Multicopy Enhancer of UAS2	1014	YLR017W	S000004007	ORF	Background_List
YDR087C	MATCH	1	RRP1	S. cerevisiae	Ribosomal RNA Processing	837	YDR087C	S000002494	ORF	Background_List
YKR084C	MATCH	1	HBS1	S. cerevisiae	Hsp70 subfamily B Suppressor	1836	YKR084C	S000001792	ORF	Background_List
YNL067W	MATCH	1	RPL9B	S. cerevisiae	Ribosomal Protein of the Large subunit	576	YNL067W	S000005011	ORF	Background_List
YLR103C	MATCH	1	CDC45	S. cerevisiae	Cell Division Cycle	1953	YLR103C	S000004093	ORF	Background_List
YOR046C	MATCH	1	DBP5	S. cerevisiae	Dead Box Protein	1449	YOR046C	S000005572	ORF	Background_List
YOR130C	MATCH	1	ORT1	S. cerevisiae	ORnithine Transporter	879	YOR130C	S000005656	ORF	Background_List
YNL151C	MATCH	1	RPC31	S. cerevisiae	RNA Polymerase C	756	YNL151C	S000005095	ORF	Background_List
YNL284C	MATCH	1	MRPL10	S. cerevisiae	Mitochondrial Ribosomal Protein, Large subunit	969	YNL284C	S000005228	ORF	Background_List
YOL127W	MATCH	1	RPL25	S. cerevisiae	Ribosomal Protein of the Large subunit	843	YOL127W	S000005487	ORF	Background_List
YER103W	MATCH	1	SSA4	S. cerevisiae	Stress-Seventy subfamily A	1929	YER103W	S000000905	ORF	Background_List
YMR319C	MATCH	1	FET4	S. cerevisiae	FErrous Transport	1659	YMR319C	S000004938	ORF	Background_List
YKL120W	MATCH	1	OAC1	S. cerevisiae	OxaloAcetate Carrier	975	YKL120W	S000001603	ORF	Background_List
YMR092C	MATCH	1	AIP1	S. cerevisiae	Actin Interacting Protein	1848	YMR092C	S000004698	ORF	Background_List
YOR262W	MATCH	1	GPN2	S. cerevisiae	Gly-Pro-Asn (N) motif	1044	YOR262W	S000005788	ORF	Background_List
YKR087C	MATCH	1	OMA1	S. cerevisiae	Overlapping activity with M-AAA protease	1038	YKR087C	S000001795	ORF	Background_List
YNL066W	MATCH	1	SUN4	S. cerevisiae	Sim1 Uth1 Nca3	1263	YNL066W	S000005010	ORF	Background_List
YAR002C-A	MATCH	1	ERP1	S. cerevisiae	Emp24p/Erv25p Related Protein	660	YAR002C-A	S000002129	ORF	Background_List
YGL068W	MATCH	1	MNP1	S. cerevisiae	Mitochondrial-Nucleoid Protein	585	YGL068W	S000003036	ORF	Background_List
YDR392W	MATCH	1	SPT3	S. cerevisiae	SuPpressor of Ty's	1014	YDR392W	S000002800	ORF	Background_List
YJL082W	MATCH	1	IML2	S. cerevisiae	Increased Minichromosome Loss	2196	YJL082W	S000003618	ORF	Background_List
YJR009C	MATCH	1	TDH2	S. cerevisiae	Triose-phosphate DeHydrogenase	999	YJR009C	S000003769	ORF	Background_List
YPL028W	MATCH	1	ERG10	S. cerevisiae	ERGosterol biosynthesis	1197	YPL028W	S000005949	ORF	Background_List
YER102W	MATCH	1	RPS8B	S. cerevisiae	Ribosomal Protein of the Small subunit	603	YER102W	S000000904	ORF	Background_List
YDL125C	MATCH	1	HNT1	S. cerevisiae	Histidine triad NucleoTide-binding	588	YDL125C	S000002283	ORF	Background_List
YJR008W	MATCH	1	MHO1	S. cerevisiae	Memo HOmolog	1017	YJR008W	S000003768	ORF	Background_List
YLR100W	MATCH	1	ERG27	S. cerevisiae	ERGosterol biosynthesis	1044	YLR100W	S000004090	ORF	Background_List
YPL246C	MATCH	1	RBD2	S. cerevisiae		789	YPL246C	S000006167	ORF	Background_List
YDR363W-A	MATCH	1	SEM1	S. cerevisiae	Suppressor of Exocyst Mutations	270	YDR363W-A	S000007235	ORF	Background_List
YOR176W	MATCH	1	HEM15	S. cerevisiae	HEMe biosynthesis	1182	YOR176W	S000005702	ORF	Background_List
YDL124W	MATCH	1		S. cerevisiae		939	YDL124W	S000002282	ORF	Background_List
YMR093W	MATCH	1	UTP15	S. cerevisiae	U Three Protein	1542	YMR093W	S000004699	ORF	Background_List
YJR099W	MATCH	1	YUH1	S. cerevisiae	Yeast Ubiquitin Hydrolase	711	YJR099W	S000003860	ORF	Background_List
YIR035C	MATCH	1	NRE1	S. cerevisiae	Novel REductase	765	YIR035C	S000001474	ORF	Background_List
YJL130C	MATCH	1	URA2	S. cerevisiae	URAcil requiring	6645	YJL130C	S000003666	ORF	Background_List
YBL076C	MATCH	1	ILS1	S. cerevisiae	IsoLeucine-tRNA Synthetase	3219	YBL076C	S000000172	ORF	Background_List
YHR171W	MATCH	1	ATG7	S. cerevisiae	AuTophaGy related	1893	YHR171W	S000001214	ORF	Background_List
YBR038W	MATCH	1	CHS2	S. cerevisiae	CHitin Synthase	2892	YBR038W	S000000242	ORF	Background_List
YKR001C	MATCH	1	VPS1	S. cerevisiae	Vacuolar Protein Sorting	2115	YKR001C	S000001709	ORF	Background_List
YKL212W	MATCH	1	SAC1	S. cerevisiae	Suppressor of ACtin	1872	YKL212W	S000001695	ORF	Background_List
YDL215C	MATCH	1	GDH2	S. cerevisiae	Glutamate DeHydrogenase	3279	YDL215C	S000002374	ORF	Background_List
YGL191W	MATCH	1	COX13	S. cerevisiae	Cytochrome c OXidase	390	YGL191W	S000003159	ORF	Background_List
YHL032C	MATCH	1	GUT1	S. cerevisiae	Glycerol UTilization	2130	YHL032C	S000001024	ORF	Background_List
YLR106C	MATCH	1	REA1	S. cerevisiae	Ribosome Export/Assembly	14733	YLR106C	S000004096	ORF	Background_List
YDR353W	MATCH	1	TRR1	S. cerevisiae	ThioRedoxin Reductase	960	YDR353W	S000002761	ORF	Background_List
YDR002W	MATCH	1	YRB1	S. cerevisiae	Yeast Ran Binder	606	YDR002W	S000002409	ORF	Background_List
YIR034C	MATCH	1	LYS1	S. cerevisiae	LYSine requiring	1122	YIR034C	S000001473	ORF	Background_List
YKL213C	MATCH	1	DOA1	S. cerevisiae	Degradation Of Alpha	2148	YKL213C	S000001696	ORF	Background_List
YDR268W	MATCH	1	MSW1	S. cerevisiae	Mitochondrial aminoacyl-tRNA Synthetase, tryptophan (W)	1140	YDR268W	S000002676	ORF	Background_List
YDR487C	MATCH	1	RIB3	S. cerevisiae	RIBoflavin biosynthesis	627	YDR487C	S000002895	ORF	Background_List
YBL075C	MATCH	1	SSA3	S. cerevisiae	Stress-Seventy subfamily A	1950	YBL075C	S000000171	ORF	Background_List
YCR053W	MATCH	1	THR4	S. cerevisiae	THReonine requiring	1545	YCR053W	S000000649	ORF	Background_List
YFR050C	MATCH	1	PRE4	S. cerevisiae	PRoteinase yscE	801	YFR050C	S000001946	ORF	Background_List
YHL030W	MATCH	1	ECM29	S. cerevisiae	ExtraCellular Mutant	5607	YHL030W	S000001022	ORF	Background_List
YGR208W	MATCH	1	SER2	S. cerevisiae	SERine requiring	930	YGR208W	S000003440	ORF	Background_List
YBR039W	MATCH	1	ATP3	S. cerevisiae	ATP synthase	936	YBR039W	S000000243	ORF	Background_List
YKR048C	MATCH	1	NAP1	S. cerevisiae	Nucleosome Assembly Protein	1254	YKR048C	S000001756	ORF	Background_List
YAL033W	MATCH	1	POP5	S. cerevisiae	Processing Of Precursor RNAs	522	YAL033W	S000000031	ORF	Background_List
YML115C	MATCH	1	VAN1	S. cerevisiae	VANadate resistance protein	1608	YML115C	S000004583	ORF	Background_List
YOL077C	MATCH	1	BRX1	S. cerevisiae	Xenopus laevis Brix (Biogenesis of Ribosomes in Xenopus) homolog	876	YOL077C	S000005437	ORF	Background_List
YLR324W	MATCH	1	PEX30	S. cerevisiae	PEroXisome related	1572	YLR324W	S000004316	ORF	Background_List
YLR325C	MATCH	1	RPL38	S. cerevisiae	Ribosomal Protein of the Large subunit	237	YLR325C	S000004317	ORF	Background_List
YMR095C	MATCH	1	SNO1	S. cerevisiae	SNZ proximal Open reading frame	675	YMR095C	S000004701	ORF	Background_List
YJR097W	MATCH	1	JJJ3	S. cerevisiae	J-protein (Type III)	519	YJR097W	S000003858	ORF	Background_List
YGL190C	MATCH	1	CDC55	S. cerevisiae	Cell Division Cycle	1581	YGL190C	S000003158	ORF	Background_List
YLR390W-A	MATCH	1	CCW14	S. cerevisiae	Covalently linked Cell Wall protein	717	YLR390W-A	S000006429	ORF	Background_List
YPR167C	MATCH	1	MET16	S. cerevisiae	METhionine requiring	786	YPR167C	S000006371	ORF	Background_List
YKR002W	MATCH	1	PAP1	S. cerevisiae	Poly(A) Polymerase	1707	YKR002W	S000001710	ORF	Background_List
YGR205W	MATCH	1	TDA10	S. cerevisiae	Topoisomerase I Damage Affected	873	YGR205W	S000003437	ORF	Background_List
YNL329C	MATCH	1	PEX6	S. cerevisiae	PEroXin	3093	YNL329C	S000005273	ORF	Background_List
YFR051C	MATCH	1	RET2	S. cerevisiae	RETrieval from ER	1641	YFR051C	S000001947	ORF	Background_List
YHR088W	MATCH	1	RPF1	S. cerevisiae	Ribosome Production Factor	888	YHR088W	S000001130	ORF	Background_List
YKL125W	MATCH	1	RRN3	S. cerevisiae	Regulation of RNA polymerase I	1884	YKL125W	S000001608	ORF	Background_List
YHR089C	MATCH	1	GAR1	S. cerevisiae	Glycine Arginine Rich	618	YHR089C	S000001131	ORF	Background_List
YDR224C	MATCH	1	HTB1	S. cerevisiae	Histone h Two B	396	YDR224C	S000002632	ORF	Background_List
YBR037C	MATCH	1	SCO1	S. cerevisiae	Suppressor of Cytochrome Oxidase deficiency	888	YBR037C	S000000241	ORF	Background_List
YDR139C	MATCH	1	RUB1	S. cerevisiae	Related to UBiquitin	307	YDR139C	S000002546	ORF	Background_List
YJR098C	MATCH	1		S. cerevisiae		1971	YJR098C	S000003859	ORF	Background_List
YBR122C	MATCH	1	MRPL36	S. cerevisiae	Mitochondrial Ribosomal Protein, Large subunit	534	YBR122C	S000000326	ORF	Background_List
YDL212W	MATCH	1	SHR3	S. cerevisiae	Super high Histidine Resistant	633	YDL212W	S000002371	ORF	Background_List
YJR096W	MATCH	1		S. cerevisiae		849	YJR096W	S000003857	ORF	Background_List
YMR096W	MATCH	1	SNZ1	S. cerevisiae	SNooZe	894	YMR096W	S000004702	ORF	Background_List
YGR207C	MATCH	1	CIR1	S. cerevisiae	Changed Intracellular Redox state	786	YGR207C	S000003439	ORF	Background_List
YPR166C	MATCH	1	MRP2	S. cerevisiae	Mitochondrial Ribosomal Protein	348	YPR166C	S000006370	ORF	Background_List
YPR033C	MATCH	1	HTS1	S. cerevisiae	Histidine-Trna Synthetase	1641	YPR033C	S000006237	ORF	Background_List
YKL211C	MATCH	1	TRP3	S. cerevisiae	TRyPtophan	1455	YKL211C	S000001694	ORF	Background_List
YNL328C	MATCH	1	MDJ2	S. cerevisiae	Mitochondrial DnaJ homolog	441	YNL328C	S000005272	ORF	Background_List
YPR165W	MATCH	1	RHO1	S. cerevisiae	Ras HOmolog	630	YPR165W	S000006369	ORF	Background_List
YCR051W	MATCH	1		S. cerevisiae		669	YCR051W	S000000647	ORF	Background_List
YKL210W	MATCH	1	UBA1	S. cerevisiae	UBiquitin Activating	3075	YKL210W	S000001693	ORF	Background_List
YCL001W	MATCH	1	RER1	S. cerevisiae	Retention in the Endoplasmic Reticulum	567	YCL001W	S000000507	ORF	Background_List
YAL036C	MATCH	1	RBG1	S. cerevisiae	RiBosome interacting Gtpase	1110	YAL036C	S000000034	ORF	Background_List
YKL126W	MATCH	1	YPK1	S. cerevisiae	Yeast Protein Kinase	2043	YKL126W	S000001609	ORF	Background_List
YAL035W	MATCH	1	FUN12	S. cerevisiae	Function Unknown Now	3009	YAL035W	S000000033	ORF	Background_List
YER107C	MATCH	1	GLE2	S. cerevisiae	GLFG LEthal	1098	YER107C	S000000909	ORF	Background_List
YLR104W	MATCH	1	LCL2	S. cerevisiae	Long Chronological Lifespan 2	396	YLR104W	S000004094	ORF	Background_List
YLR237W	MATCH	1	THI7	S. cerevisiae	THIamine metabolism	1797	YLR237W	S000004227	ORF	Background_List
YDL128W	MATCH	1	VCX1	S. cerevisiae	VaCuolar H+/Ca2+ eXchanger	1236	YDL128W	S000002286	ORF	Background_List
YBR256C	MATCH	1	RIB5	S. cerevisiae	RIBoflavin biosynthesis	717	YBR256C	S000000460	ORF	Background_List
YOL030W	MATCH	1	GAS5	S. cerevisiae	Glycophospholipid-Anchored Surface protein	1455	YOL030W	S000005390	ORF	Background_List
YGR119C	MATCH	1	NUP57	S. cerevisiae	NUclear Pore	1626	YGR119C	S000003351	ORF	Background_List
YDL219W	MATCH	1	DTD1	S. cerevisiae	D-Tyr-tRNA(Tyr) Deacylase	524	YDL219W	S000002378	ORF	Background_List
YDR047W	MATCH	1	HEM12	S. cerevisiae	HEMe biosynthesis	1089	YDR047W	S000002454	ORF	Background_List
YJR095W	MATCH	1	SFC1	S. cerevisiae	Succinate-Fumarate Carrier	969	YJR095W	S000003856	ORF	Background_List
YPR035W	MATCH	1	GLN1	S. cerevisiae	GLutamiNe metabolism	1113	YPR035W	S000006239	ORF	Background_List
YAL039C	MATCH	1	CYC3	S. cerevisiae	CYtochrome C	810	YAL039C	S000000037	ORF	Background_List
YLR328W	MATCH	1	NMA1	S. cerevisiae	Nicotinamide Mononucleotide Adenylyltransferase	1206	YLR328W	S000004320	ORF	Background_List
YGR203W	MATCH	1	YCH1	S. cerevisiae	Yeast Cdc25 Homolog	447	YGR203W	S000003435	ORF	Background_List
YNL192W	MATCH	1	CHS1	S. cerevisiae	CHitin Synthase	3396	YNL192W	S000005136	ORF	Background_List
YGL195W	MATCH	1	GCN1	S. cerevisiae	General Control Nonderepressible	8019	YGL195W	S000003163	ORF	Background_List
YJL088W	MATCH	1	ARG3	S. cerevisiae	ARGinine requiring	1017	YJL088W	S000003624	ORF	Background_List
YPR169W	MATCH	1	JIP5	S. cerevisiae	Jumonji domain Interacting Protein	1479	YPR169W	S000006373	ORF	Background_List
YEL050C	MATCH	1	RML2	S. cerevisiae	Ribosomal Mitochondrial Large	1182	YEL050C	S000000776	ORF	Background_List
YAL038W	MATCH	1	CDC19	S. cerevisiae	Cell Division Cycle	1503	YAL038W	S000000036	ORF	Background_List
YOR086C	MATCH	1	TCB1	S. cerevisiae	Three Calcium and lipid Binding domains (TriCalBins)	3561	YOR086C	S000005612	ORF	Background_List
YKL053C-A	MATCH	1	MDM35	S. cerevisiae	Mitochondrial Distribution and Morphology	261	YKL053C-A	S000007243	ORF	Background_List
YCR098C	MATCH	1	GIT1	S. cerevisiae	GlycerophosphoInosiTol	1557	YCR098C	S000000695	ORF	Background_List
YHR072W-A	MATCH	1	NOP10	S. cerevisiae	NucleOlar Protein	177	YHR072W-A	S000007455	ORF	Background_List
YPL209C	MATCH	1	IPL1	S. cerevisiae	Increase in PLoidy	1104	YPL209C	S000006130	ORF	Background_List
YBR213W	MATCH	1	MET8	S. cerevisiae	METhionine requiring	825	YBR213W	S000000417	ORF	Background_List
YNL191W	MATCH	1	DUG3	S. cerevisiae	Deficient in Utilization of Glutathione	1074	YNL191W	S000005135	ORF	Background_List
YML026C	MATCH	1	RPS18B	S. cerevisiae	Ribosomal Protein of the Small subunit	842	YML026C	S000004488	ORF	Background_List
YJL174W	MATCH	1	KRE9	S. cerevisiae	Killer toxin REsistant	831	YJL174W	S000003710	ORF	Background_List
YIR037W	MATCH	1	HYR1	S. cerevisiae	HYdroperoxide Resistance	492	YIR037W	S000001476	ORF	Background_List
YKL217W	MATCH	1	JEN1	S. cerevisiae		1851	YKL217W	S000001700	ORF	Background_List
YPR168W	MATCH	1	NUT2	S. cerevisiae	Negative regulation of URS Two	474	YPR168W	S000006372	ORF	Background_List
YMR099C	MATCH	1		S. cerevisiae		894	YMR099C	S000004705	ORF	Background_List
YEL051W	MATCH	1	VMA8	S. cerevisiae	Vacuolar Membrane Atpase	771	YEL051W	S000000777	ORF	Background_List
YDR049W	MATCH	1	VMS1	S. cerevisiae	VCP/Cdc48-associated Mitochondrial Stress-responsive	1899	YDR049W	S000002456	ORF	Background_List
YLR459W	MATCH	1	GAB1	S. cerevisiae	GPI and Actin Bar	1185	YLR459W	S000004451	ORF	Background_List
YDR486C	MATCH	1	VPS60	S. cerevisiae	Vacuolar Protein Sorting	690	YDR486C	S000002894	ORF	Background_List
YGR116W	MATCH	1	SPT6	S. cerevisiae	SuPpressor of Ty's	4356	YGR116W	S000003348	ORF	Background_List
YGL194C	MATCH	1	HOS2	S. cerevisiae	Hda One Similar	1359	YGL194C	S000003162	ORF	Background_List
YBR126C	MATCH	1	TPS1	S. cerevisiae	Trehalose-6-Phosphate Synthase	1488	YBR126C	S000000330	ORF	Background_List
YLR410W	MATCH	1	VIP1	S. cerevisiae		3441	YLR410W	S000004402	ORF	Background_List
YDL217C	MATCH	1	TIM22	S. cerevisiae	Translocase of the Inner Mitochondrial membrane	624	YDL217C	S000002376	ORF	Background_List
YDR135C	MATCH	1	YCF1	S. cerevisiae	Yeast Cadmium Factor	4548	YDR135C	S000002542	ORF	Background_List
YGR202C	MATCH	1	PCT1	S. cerevisiae	Phosphocholine CytidylylTransferase	1275	YGR202C	S000003434	ORF	Background_List
YDR399W	MATCH	1	HPT1	S. cerevisiae	Hypoxanthine guanine PhosphoribosylTransferase	666	YDR399W	S000002807	ORF	Background_List
YEL052W	MATCH	1	AFG1	S. cerevisiae	ATPase Family Gene	1530	YEL052W	S000000778	ORF	Background_List
YLR109W	MATCH	1	AHP1	S. cerevisiae	Alkyl HydroPeroxide reductase	531	YLR109W	S000004099	ORF	Background_List
YKL215C	MATCH	1	OXP1	S. cerevisiae	OXoProlinase	3861	YKL215C	S000001698	ORF	Background_List
YML028W	MATCH	1	TSA1	S. cerevisiae	Thiol-Specific Antioxidant	591	YML028W	S000004490	ORF	Background_List
YHL036W	MATCH	1	MUP3	S. cerevisiae	Methionine UPtake	1641	YHL036W	S000001028	ORF	Background_List
YLL050C	MATCH	1	COF1	S. cerevisiae	COFilin	611	YLL050C	S000003973	ORF	Background_List
YHR170W	MATCH	1	NMD3	S. cerevisiae	Nonsense-Mediated mRNA Decay	1557	YHR170W	S000001213	ORF	Background_List
YBR127C	MATCH	1	VMA2	S. cerevisiae	Vacuolar Membrane Atpase	1554	YBR127C	S000000331	ORF	Background_List
YPL206C	MATCH	1	PGC1	S. cerevisiae	Phosphatidyl Glycerol phospholipase C	966	YPL206C	S000006127	ORF	Background_List
YDR001C	MATCH	1	NTH1	S. cerevisiae	Neutral TreHalase	2256	YDR001C	S000002408	ORF	Background_List
YDR267C	MATCH	1	CIA1	S. cerevisiae	Cytosolic Iron-sulfur protein Assembly	993	YDR267C	S000002675	ORF	Background_List
YLR327C	MATCH	1	TMA10	S. cerevisiae	Translation Machinery Associated	261	YLR327C	S000004319	ORF	Background_List
YJR132W	MATCH	1	NMD5	S. cerevisiae	Nonsense-Mediated mRNA Decay	3147	YJR132W	S000003893	ORF	Background_List
YBL036C	MATCH	1		S. cerevisiae		774	YBL036C	S000000132	ORF	Background_List
YGR211W	MATCH	1	ZPR1	S. cerevisiae	Zinc finger PRotein	1461	YGR211W	S000003443	ORF	Background_List
YBR260C	MATCH	1	RGD1	S. cerevisiae	Related GAP Domain	2001	YBR260C	S000000464	ORF	Background_List
YDL190C	MATCH	1	UFD2	S. cerevisiae	Ubiquitin Fusion Degradation	2886	YDL190C	S000002349	ORF	Background_List
YJL126W	MATCH	1	NIT2	S. cerevisiae	NITrilase superfamily	924	YJL126W	S000003662	ORF	Background_List
YKR009C	MATCH	1	FOX2	S. cerevisiae	Fatty acid OXidation	2703	YKR009C	S000001717	ORF	Background_List
YLR429W	MATCH	1	CRN1	S. cerevisiae	CoRoNin	1956	YLR429W	S000004421	ORF	Background_List
YOR217W	MATCH	1	RFC1	S. cerevisiae	Replication Factor C	2586	YOR217W	S000005743	ORF	Background_List
YBR175W	MATCH	1	SWD3	S. cerevisiae	Set1c, WD40 repeat protein	948	YBR175W	S000000379	ORF	Background_List
YMR296C	MATCH	1	LCB1	S. cerevisiae	Long-Chain Base	1677	YMR296C	S000004911	ORF	Background_List
YBR043C	MATCH	1	QDR3	S. cerevisiae	QuiniDine Resistance	2070	YBR043C	S000000247	ORF	Background_List
YBR261C	MATCH	1	TAE1	S. cerevisiae	Translation Associated Element	699	YBR261C	S000000465	ORF	Background_List
YDR339C	MATCH	1	FCF1	S. cerevisiae	Faf1p Copurifying Factor	570	YDR339C	S000002747	ORF	Background_List
YNL310C	MATCH	1	ZIM17	S. cerevisiae	ZInc finger Motif protein of 17 kDa	525	YNL310C	S000005254	ORF	Background_List
YGL119W	MATCH	1	COQ8	S. cerevisiae	COenzyme Q	1506	YGL119W	S000003087	ORF	Background_List
YDR204W	MATCH	1	COQ4	S. cerevisiae	COenzyme Q	1008	YDR204W	S000002612	ORF	Background_List
YEL042W	MATCH	1	GDA1	S. cerevisiae	Guanosine DiphosphatAse	1557	YEL042W	S000000768	ORF	Background_List
YDR337W	MATCH	1	MRPS28	S. cerevisiae	Mitochondrial Ribosomal Protein, Small subunit	861	YDR337W	S000002745	ORF	Background_List
YNL007C	MATCH	1	SIS1	S. cerevisiae	SIt4 Suppressor	1059	YNL007C	S000004952	ORF	Background_List
YLR070C	MATCH	1	XYL2	S. cerevisiae		1071	YLR070C	S000004060	ORF	Background_List
YPL030W	MATCH	1	TRM44	S. cerevisiae	TRna Methyltransferase	1704	YPL030W	S000005951	ORF	Background_List
YFL028C	MATCH	1	CAF16	S. cerevisiae	CCR4 Associated Factor	870	YFL028C	S000001866	ORF	Background_List
YNR013C	MATCH	1	PHO91	S. cerevisiae	PHOsphate metabolism	2685	YNR013C	S000005296	ORF	Background_List
YER095W	MATCH	1	RAD51	S. cerevisiae	RADiation sensitive	1203	YER095W	S000000897	ORF	Background_List
YPL078C	MATCH	1	ATP4	S. cerevisiae	ATP synthase	735	YPL078C	S000005999	ORF	Background_List
YBR176W	MATCH	1	ECM31	S. cerevisiae	ExtraCellular Mutant	939	YBR176W	S000000380	ORF	Background_List
YJR047C	MATCH	1	ANB1	S. cerevisiae	ANaeroBically induced	474	YJR047C	S000003808	ORF	Background_List
YNR012W	MATCH	1	URK1	S. cerevisiae	URidine Kinase	1506	YNR012W	S000005295	ORF	Background_List
YDR338C	MATCH	1		S. cerevisiae		2088	YDR338C	S000002746	ORF	Background_List
YBR177C	MATCH	1	EHT1	S. cerevisiae	Ethanol Hexanoyl Transferase	1356	YBR177C	S000000381	ORF	Background_List
YMR079W	MATCH	1	SEC14	S. cerevisiae	SECretory	1071	YMR079W	S000004684	ORF	Background_List
YML001W	MATCH	1	YPT7	S. cerevisiae	Yeast Protein Two	627	YML001W	S000004460	ORF	Background_List
YMR297W	MATCH	1	PRC1	S. cerevisiae	PRoteinase C	1599	YMR297W	S000004912	ORF	Background_List
YFR011C	MATCH	1	MIC19	S. cerevisiae	MItochondrial contact site and Cristae organizing system	513	YFR011C	S000001907	ORF	Background_List
YJL128C	MATCH	1	PBS2	S. cerevisiae	Polymyxin B Sensitivity	2007	YJL128C	S000003664	ORF	Background_List
YLR209C	MATCH	1	PNP1	S. cerevisiae	purine nucleoside phosphorylase	936	YLR209C	S000004199	ORF	Background_List
YNL006W	MATCH	1	LST8	S. cerevisiae	Lethal with Sec Thirteen	912	YNL006W	S000004951	ORF	Background_List
YNR016C	MATCH	1	ACC1	S. cerevisiae	Acetyl-CoA Carboxylase	6702	YNR016C	S000005299	ORF	Background_List
YGL202W	MATCH	1	ARO8	S. cerevisiae	AROmatic amino acid requiring	1503	YGL202W	S000003170	ORF	Background_List
YDR510W	MATCH	1	SMT3	S. cerevisiae	Suppressor of Mif Two	306	YDR510W	S000002918	ORF	Background_List
YFR010W	MATCH	1	UBP6	S. cerevisiae	UBiquitin-specific Protease	1500	YFR010W	S000001906	ORF	Background_List
YGR210C	MATCH	1		S. cerevisiae		1236	YGR210C	S000003442	ORF	Background_List
YOR348C	MATCH	1	PUT4	S. cerevisiae	Proline UTilization	1884	YOR348C	S000005875	ORF	Background_List
YOR215C	MATCH	1	AIM41	S. cerevisiae	Altered Inheritance of Mitochondria	558	YOR215C	S000005741	ORF	Background_List
YNR015W	MATCH	1	SMM1	S. cerevisiae	Suppressor of Mitochondrial Mutation	1155	YNR015W	S000005298	ORF	Background_List
YGR258C	MATCH	1	RAD2	S. cerevisiae	RADiation sensitivity	3096	YGR258C	S000003490	ORF	Background_List
YCR024C	MATCH	1	SLM5	S. cerevisiae	Synthetic Lethal with Mss4	1479	YCR024C	S000000618	ORF	Background_List
YMR250W	MATCH	1	GAD1	S. cerevisiae	GlutAmate Decarboxylase	1758	YMR250W	S000004862	ORF	Background_List
YBL033C	MATCH	1	RIB1	S. cerevisiae	RIBoflavin biosynthesis	1038	YBL033C	S000000129	ORF	Background_List
YGR125W	MATCH	1		S. cerevisiae		3111	YGR125W	S000003357	ORF	Background_List
YNL005C	MATCH	1	MRP7	S. cerevisiae	Mitochondrial Ribosomal Protein	1116	YNL005C	S000004950	ORF	Background_List
YHR190W	MATCH	1	ERG9	S. cerevisiae	ERGosterol biosynthesis	1335	YHR190W	S000001233	ORF	Background_List
YNL138W	MATCH	1	SRV2	S. cerevisiae	Suppressor of RasVal19	1581	YNL138W	S000005082	ORF	Background_List
YPL160W	MATCH	1	CDC60	S. cerevisiae	Cell Division Cycle	3273	YPL160W	S000006081	ORF	Background_List
YBR041W	MATCH	1	FAT1	S. cerevisiae	FATty acid transporter	2010	YBR041W	S000000245	ORF	Background_List
YJR045C	MATCH	1	SSC1	S. cerevisiae	Stress-Seventy subfamily C	1965	YJR045C	S000003806	ORF	Background_List
YMR166C	MATCH	1	MME1	S. cerevisiae	Mitochondrial Magnesium Exporter	1107	YMR166C	S000004776	ORF	Background_List
YJR130C	MATCH	1	STR2	S. cerevisiae	Sulfur TRansfer	1920	YJR130C	S000003891	ORF	Background_List
YER094C	MATCH	1	PUP3	S. cerevisiae	PUtative Proteasome subunit	618	YER094C	S000000896	ORF	Background_List
YHR191C	MATCH	1	CTF8	S. cerevisiae	Chromosome Transmission Fidelity	402	YHR191C	S000001234	ORF	Background_List
YDR334W	MATCH	1	SWR1	S. cerevisiae	SWi2/snf2-Related	4545	YDR334W	S000002742	ORF	Background_List
YNL315C	MATCH	1	ATP11	S. cerevisiae	ATP synthase	957	YNL315C	S000005259	ORF	Background_List
YCL017C	MATCH	1	NFS1	S. cerevisiae	NiFS-like	1494	YCL017C	S000000522	ORF	Background_List
YMR033W	MATCH	1	ARP9	S. cerevisiae	Actin-Related Protein	1490	YMR033W	S000004636	ORF	Background_List
YLR291C	MATCH	1	GCD7	S. cerevisiae	General Control Derepressed	1146	YLR291C	S000004282	ORF	Background_List
YPR172W	MATCH	1		S. cerevisiae		603	YPR172W	S000006376	ORF	Background_List
YOR306C	MATCH	1	MCH5	S. cerevisiae	MonoCarboxylate transporter Homolog	1566	YOR306C	S000005833	ORF	Background_List
YML042W	MATCH	1	CAT2	S. cerevisiae	Carnitine AcetylTransferase	2013	YML042W	S000004506	ORF	Background_List
YDL193W	MATCH	1	NUS1	S. cerevisiae	Nuclear Undecaprenyl pyrophosphate Synthase	1128	YDL193W	S000002352	ORF	Background_List
YDL060W	MATCH	1	TSR1	S. cerevisiae	Twenty S rRNA accumulation	2367	YDL060W	S000002218	ORF	Background_List
YKL082C	MATCH	1	RRP14	S. cerevisiae	Ribosomal RNA Processing	1305	YKL082C	S000001565	ORF	Background_List
YER053C	MATCH	1	PIC2	S. cerevisiae	PI Carrier	903	YER053C	S000000855	ORF	Background_List
YGR123C	MATCH	1	PPT1	S. cerevisiae	Protein Phosphatase T	1542	YGR123C	S000003355	ORF	Background_List
YMR034C	MATCH	1	RCH1	S. cerevisiae	Regulator of Calcium Homeostasis	1305	YMR034C	S000004637	ORF	Background_List
YPR173C	MATCH	1	VPS4	S. cerevisiae	Vacuolar Protein Sorting	1314	YPR173C	S000006377	ORF	Background_List
YBR132C	MATCH	1	AGP2	S. cerevisiae	high-Affinity Glutamine Permease	1791	YBR132C	S000000336	ORF	Background_List
YOL071W	MATCH	1	SDH5	S. cerevisiae	Succinate DeHydrogenase	489	YOL071W	S000005432	ORF	Background_List
YDR117C	MATCH	1	TMA64	S. cerevisiae	Translation Machinery Associated	1698	YDR117C	S000002524	ORF	Background_List
YJR044C	MATCH	1	VPS55	S. cerevisiae	Vacuolar Protein Sorting	423	YJR044C	S000003805	ORF	Background_List
YEL046C	MATCH	1	GLY1	S. cerevisiae	GLYcine requiring	1164	YEL046C	S000000772	ORF	Background_List
YLR074C	MATCH	1	BUD20	S. cerevisiae	BUD site selection	501	YLR074C	S000004064	ORF	Background_List
YHR108W	MATCH	1	GGA2	S. cerevisiae	Golgi-localized, Gamma-adaptin ear homology, Arf-binding protein	1758	YHR108W	S000001150	ORF	Background_List
YGR256W	MATCH	1	GND2	S. cerevisiae	6-phosphoGlucoNateDehydrogenase	1479	YGR256W	S000003488	ORF	Background_List
YMR167W	MATCH	1	MLH1	S. cerevisiae	MutL Homolog	2310	YMR167W	S000004777	ORF	Background_List
YNL229C	MATCH	1	URE2	S. cerevisiae	UREidosuccinate transport	1065	YNL229C	S000005173	ORF	Background_List
YGR038W	MATCH	1	ORM1	S. cerevisiae		669	YGR038W	S000003270	ORF	Background_List
YPR086W	MATCH	1	SUA7	S. cerevisiae	Suppressor of Upstream AUG	1038	YPR086W	S000006290	ORF	Background_List
YMR120C	MATCH	1	ADE17	S. cerevisiae	ADEnine	1779	YMR120C	S000004727	ORF	Background_List
YDR116C	MATCH	1	MRPL1	S. cerevisiae	Mitochondrial Ribosomal Protein, Large subunit	858	YDR116C	S000002523	ORF	Background_List
YEL047C	MATCH	1	FRD1	S. cerevisiae	Fumarate ReDuctase	1413	YEL047C	S000000773	ORF	Background_List
YGR257C	MATCH	1	MTM1	S. cerevisiae	Manganese Trafficking factor for Mitochondrial SOD2	1101	YGR257C	S000003489	ORF	Background_List
YER052C	MATCH	1	HOM3	S. cerevisiae	HOMoserine requiring	1584	YER052C	S000000854	ORF	Background_List
YBL078C	MATCH	1	ATG8	S. cerevisiae	AuTophaGy related	354	YBL078C	S000000174	ORF	Background_List
YGL207W	MATCH	1	SPT16	S. cerevisiae	SuPpressor of Ty	3108	YGL207W	S000003175	ORF	Background_List
YCL018W	MATCH	1	LEU2	S. cerevisiae	LEUcine biosynthesis	1095	YCL018W	S000000523	ORF	Background_List
YOR304W	MATCH	1	ISW2	S. cerevisiae	Imitation SWitch subfamily	3363	YOR304W	S000005831	ORF	Background_List
YBL030C	MATCH	1	PET9	S. cerevisiae	PETite	957	YBL030C	S000000126	ORF	Background_List
YMR035W	MATCH	1	IMP2	S. cerevisiae	Inner Membrane Protease	534	YMR035W	S000004638	ORF	Background_List
YPR041W	MATCH	1	TIF5	S. cerevisiae	Translation Initiation Factor	1218	YPR041W	S000006245	ORF	Background_List
YJL062W-A	MATCH	1	COA3	S. cerevisiae	Cytochrome Oxidase Assembly	258	YJL062W-A	S000007611	ORF	Background_List
YNL313C	MATCH	1	EMW1	S. cerevisiae	Essential for Maintenance of the cell Wall	2715	YNL313C	S000005257	ORF	Background_List
YOR219C	MATCH	1	STE13	S. cerevisiae	STErile	2796	YOR219C	S000005745	ORF	Background_List
YIL051C	MATCH	1	MMF1	S. cerevisiae	Mitochondrial Matrix Factor	438	YIL051C	S000001313	ORF	Background_List
YCR068W	MATCH	1	ATG15	S. cerevisiae	AuTophaGy related	1563	YCR068W	S000000664	ORF	Background_List
YML130C	MATCH	1	ERO1	S. cerevisiae	ER Oxidation or Endoplasmic Reticulum Oxidoreductin	1692	YML130C	S000004599	ORF	Background_List
YGR036C	MATCH	1	CAX4	S. cerevisiae	CAlmodulin-dependent in cmd one two twenty-siX	720	YGR036C	S000003268	ORF	Background_List
YER099C	MATCH	1	PRS2	S. cerevisiae	PhosphoRibosylpyrophosphate Synthetase	957	YER099C	S000000901	ORF	Background_List
YMR121C	MATCH	1	RPL15B	S. cerevisiae	Ribosomal Protein of the Large subunit	615	YMR121C	S000004728	ORF	Background_List
YJL124C	MATCH	1	LSM1	S. cerevisiae	Like SM	519	YJL124C	S000003660	ORF	Background_List
YKL080W	MATCH	1	VMA5	S. cerevisiae	Vacuolar Membrane Atpase	1179	YKL080W	S000001563	ORF	Background_List
YCR020C	MATCH	1	PET18	S. cerevisiae	PETite colonies	648	YCR020C	S000000613	ORF	Background_List
YDR335W	MATCH	1	MSN5	S. cerevisiae	Multicopy suppressor of SNf1 mutation	3675	YDR335W	S000002743	ORF	Background_List
YNL227C	MATCH	1	JJJ1	S. cerevisiae	J-protein (Type III)	1773	YNL227C	S000005171	ORF	Background_List
YOR303W	MATCH	1	CPA1	S. cerevisiae	Carbamyl Phosphate synthetase A	1236	YOR303W	S000005829	ORF	Background_List
YNR011C	MATCH	1	PRP2	S. cerevisiae	Pre-mRNA Processing	2631	YNR011C	S000005294	ORF	Background_List
YPR040W	MATCH	1	TIP41	S. cerevisiae	Tap42 Interacting Protein	1071	YPR040W	S000006244	ORF	Background_List
YLR290C	MATCH	1	COQ11	S. cerevisiae	COenzyme Q	834	YLR290C	S000004281	ORF	Background_List
YGL206C	MATCH	1	CHC1	S. cerevisiae	Clathrin Heavy Chain	4962	YGL206C	S000003174	ORF	Background_List
YFL022C	MATCH	1	FRS2	S. cerevisiae	phenylalanyl (F)-tRNA Synthetase	1512	YFL022C	S000001872	ORF	Background_List
YOL075C	MATCH	1		S. cerevisiae		3885	YOL075C	S000005435	ORF	Background_List
YBR263W	MATCH	1	SHM1	S. cerevisiae	Serine HydroxyMethyltransferase	1473	YBR263W	S000000467	ORF	Background_List
YDL192W	MATCH	1	ARF1	S. cerevisiae	ADP-Ribosylation Factor	546	YDL192W	S000002351	ORF	Background_List
YGR255C	MATCH	1	COQ6	S. cerevisiae	COenzyme Q	1440	YGR255C	S000003487	ORF	Background_List
YJL125C	MATCH	1	GCD14	S. cerevisiae	General Control Nonderepressible	1152	YJL125C	S000003661	ORF	Background_List
YBR046C	MATCH	1	ZTA1	S. cerevisiae	ZeTA-crystallin	1005	YBR046C	S000000250	ORF	Background_List
YGR037C	MATCH	1	ACB1	S. cerevisiae	Acyl-CoA-Binding	264	YGR037C	S000003269	ORF	Background_List
YMR256C	MATCH	1	COX7	S. cerevisiae	Cytochrome c OXidase	183	YMR256C	S000004869	ORF	Background_List
YMR038C	MATCH	1	CCS1	S. cerevisiae	Copper Chaperone for SOD1	750	YMR038C	S000004641	ORF	Background_List
YBR082C	MATCH	1	UBC4	S. cerevisiae	UBiquitin-Conjugating	542	YBR082C	S000000286	ORF	Background_List
YDL045W-A	MATCH	1	MRP10	S. cerevisiae	Mitochondrial Ribosomal Protein	288	YDL045W-A	S000006430	ORF	Background_List
YJR007W	MATCH	1	SUI2	S. cerevisiae	SUppressor of Initiator codon	915	YJR007W	S000003767	ORF	Background_List
YKL170W	MATCH	1	MRPL38	S. cerevisiae	Mitochondrial Ribosomal Protein, Large subunit	417	YKL170W	S000001653	ORF	Background_List
YOR257W	MATCH	1	CDC31	S. cerevisiae	Cell Division Cycle	486	YOR257W	S000005783	ORF	Background_List
YER141W	MATCH	1	COX15	S. cerevisiae	Cytochrome c OXidase	1461	YER141W	S000000943	ORF	Background_List
YOR039W	MATCH	1	CKB2	S. cerevisiae	Casein Kinase Beta' subunit	777	YOR039W	S000005565	ORF	Background_List
YDL198C	MATCH	1	GGC1	S. cerevisiae	GDP/GTP Carrier	903	YDL198C	S000002357	ORF	Background_List
YKL085W	MATCH	1	MDH1	S. cerevisiae	Malate DeHydrogenase	1005	YKL085W	S000001568	ORF	Background_List
YHR019C	MATCH	1	DED81	S. cerevisiae	Defines Essential Domain	1665	YHR019C	S000001061	ORF	Background_List
YPL122C	MATCH	1	TFB2	S. cerevisiae	Transcription Factor B subunit 2	1542	YPL122C	S000006043	ORF	Background_List
YDL064W	MATCH	1	UBC9	S. cerevisiae	UBiquitin-Conjugating	584	YDL064W	S000002222	ORF	Background_List
YOR341W	MATCH	1	RPA190	S. cerevisiae	RNA Polymerase A	4995	YOR341W	S000005868	ORF	Background_List
YPL037C	MATCH	1	EGD1	S. cerevisiae	Enhancer of Gal4 DNA binding	474	YPL037C	S000005958	ORF	Background_List
YGL112C	MATCH	1	TAF6	S. cerevisiae	TATA binding protein-Associated Factor	1551	YGL112C	S000003080	ORF	Background_List
YOR124C	MATCH	1	UBP2	S. cerevisiae	UBiquitin-specific Protease	3819	YOR124C	S000005650	ORF	Background_List
YOL077W-A	MATCH	1	ATP19	S. cerevisiae	ATP synthase	207	YOL077W-A	S000007339	ORF	Background_List
YEL002C	MATCH	1	WBP1	S. cerevisiae	Wheat germ agglutinin-Binding Protein	1293	YEL002C	S000000728	ORF	Background_List
YLR163C	MATCH	1	MAS1	S. cerevisiae	Mitochondrial ASsembly	1389	YLR163C	S000004153	ORF	Background_List
YGR252W	MATCH	1	GCN5	S. cerevisiae	General Control Nonderepressible	1320	YGR252W	S000003484	ORF	Background_List
YLR078C	MATCH	1	BOS1	S. cerevisiae	Bet One Suppressor	824	YLR078C	S000004068	ORF	Background_List
YGR167W	MATCH	1	CLC1	S. cerevisiae	Clathrin Light Chain	702	YGR167W	S000003399	ORF	Background_List
YHR104W	MATCH	1	GRE3	S. cerevisiae	Genes de Respuesta a Estres (stress responsive genes)	984	YHR104W	S000001146	ORF	Background_List
YKL086W	MATCH	1	SRX1	S. cerevisiae	SulfiRedoXin	384	YKL086W	S000001569	ORF	Background_List
YJR006W	MATCH	1	POL31	S. cerevisiae	POLymerase	1464	YJR006W	S000003766	ORF	Background_List
YMR123W	MATCH	1	PKR1	S. cerevisiae	Pichia farinosa Killer toxin Resistance	369	YMR123W	S000004730	ORF	Background_List
YNR053C	MATCH	1	NOG2	S. cerevisiae	NucleOlar G-protein	1993	YNR053C	S000005336	ORF	Background_List
YNL132W	MATCH	1	KRE33	S. cerevisiae	Killer toxin REsistant	3171	YNL132W	S000005076	ORF	Background_List
YGL026C	MATCH	1	TRP5	S. cerevisiae	TRyPtophan	2124	YGL026C	S000002994	ORF	Background_List
YML086C	MATCH	1	ALO1	S. cerevisiae	D-Arabinono-1,4-Lactone Oxidase	1581	YML086C	S000004551	ORF	Background_List
YKR092C	MATCH	1	SRP40	S. cerevisiae	Serine Rich Protein	1221	YKR092C	S000001800	ORF	Background_List
YGR253C	MATCH	1	PUP2	S. cerevisiae	PUtative Proteasome subunit	783	YGR253C	S000003485	ORF	Background_List
YER056C	MATCH	1	FCY2	S. cerevisiae	FluoroCYtosine resistance	1602	YER056C	S000000858	ORF	Background_List
YLR380W	MATCH	1	CSR1	S. cerevisiae	Chs5 Spa2 Rescue	1227	YLR380W	S000004372	ORF	Background_List
YBR080C	MATCH	1	SEC18	S. cerevisiae	SECretory	2277	YBR080C	S000000284	ORF	Background_List
YGR031W	MATCH	1	IMO32	S. cerevisiae	Intermediate cleaved by Mitochondrial Octapeptidyl aminopeptidase	1029	YGR031W	S000003263	ORF	Background_List
YJR139C	MATCH	1	HOM6	S. cerevisiae	HOMoserine requiring	1080	YJR139C	S000003900	ORF	Background_List
YER048W-A	MATCH	1	ISD11	S. cerevisiae	Iron-Sulfur protein biogenesis, Desulfurase-interacting protein	285	YER048W-A	S000007237	ORF	Background_List
YJR005W	MATCH	1	APL1	S. cerevisiae	clathrin Adaptor Protein complex Large chain	2103	YJR005W	S000003765	ORF	Background_List
YEL020W-A	MATCH	1	TIM9	S. cerevisiae	Translocase of the Inner Mitochondrial membrane	264	YEL020W-A	S000007256	ORF	Background_List
YEL003W	MATCH	1	GIM4	S. cerevisiae	Gene Involved in Microtubule biogenesis	424	YEL003W	S000000729	ORF	Background_List
YDR292C	MATCH	1	SRP101	S. cerevisiae	Signal Recognition Particle	1866	YDR292C	S000002700	ORF	Background_List
YOR036W	MATCH	1	PEP12	S. cerevisiae	carboxyPEPtidase Y-deficient	867	YOR036W	S000005562	ORF	Background_List
YOR388C	MATCH	1	FDH1	S. cerevisiae	Formate DeHydrogenase	1131	YOR388C	S000005915	ORF	Background_List
YOR122C	MATCH	1	PFY1	S. cerevisiae	ProFilin of Yeast	590	YOR122C	S000005648	ORF	Background_List
YER055C	MATCH	1	HIS1	S. cerevisiae	HIStidine	894	YER055C	S000000857	ORF	Background_List
YDR291W	MATCH	1	HRQ1	S. cerevisiae	Homologous to RecQ protein	3234	YDR291W	S000002699	ORF	Background_List
YOL119C	MATCH	1	MCH4	S. cerevisiae	MonoCarboxylate transporter Homolog	1506	YOL119C	S000005479	ORF	Background_List
YGR165W	MATCH	1	MRPS35	S. cerevisiae	Mitochondrial Ribosomal Protein, Small subunit	1038	YGR165W	S000003397	ORF	Background_List
YGL242C	MATCH	1		S. cerevisiae		546	YGL242C	S000003211	ORF	Background_List
YIL147C	MATCH	1	SLN1	S. cerevisiae	Synthetic Lethal of N-end rule	3663	YIL147C	S000001409	ORF	Background_List
YNL262W	MATCH	1	POL2	S. cerevisiae	POLymerase	6669	YNL262W	S000005206	ORF	Background_List
YHR107C	MATCH	1	CDC12	S. cerevisiae	Cell Division Cycle	1224	YHR107C	S000001149	ORF	Background_List
YEL004W	MATCH	1	YEA4	S. cerevisiae		1029	YEL004W	S000000730	ORF	Background_List
YNR055C	MATCH	1	HOL1	S. cerevisiae	HistidinOl	1761	YNR055C	S000005338	ORF	Background_List
YOR120W	MATCH	1	GCY1	S. cerevisiae	Galactose-inducible Crystallin-like Yeast protein	939	YOR120W	S000005646	ORF	Background_List
YPL169C	MATCH	1	MEX67	S. cerevisiae	Messenger RNA EXport factor of 67 kDa	1800	YPL169C	S000006090	ORF	Background_List
YOR168W	MATCH	1	GLN4	S. cerevisiae	GLutamiNe metabolism	2430	YOR168W	S000005694	ORF	Background_List
YNL178W	MATCH	1	RPS3	S. cerevisiae	Ribosomal Protein of the Small subunit	723	YNL178W	S000005122	ORF	Background_List
YNL045W	MATCH	1	LAP2	S. cerevisiae	Leucine AminoPeptidases	2016	YNL045W	S000004990	ORF	Background_List
YKR094C	MATCH	1	RPL40B	S. cerevisiae	Ribosomal Protein of the Large subunit	755	YKR094C	S000001802	ORF	Background_List
YOR254C	MATCH	1	SEC63	S. cerevisiae	SECretory	1992	YOR254C	S000005780	ORF	Background_List
YGR033C	MATCH	1	TIM21	S. cerevisiae	Translocase of the Inner Mitochondrial membrane	720	YGR033C	S000003265	ORF	Background_List
YGL156W	MATCH	1	AMS1	S. cerevisiae	Alpha-MannoSidase	3252	YGL156W	S000003124	ORF	Background_List
YLL026W	MATCH	1	HSP104	S. cerevisiae	Heat Shock Protein	2727	YLL026W	S000003949	ORF	Background_List
YLR075W	MATCH	1	RPL10	S. cerevisiae	Ribosomal Protein of the Large subunit	666	YLR075W	S000004065	ORF	Background_List
YMR127C	MATCH	1	SAS2	S. cerevisiae	Something About Silencing	1017	YMR127C	S000004734	ORF	Background_List
YJR137C	MATCH	1	MET5	S. cerevisiae	METhionine requiring	4329	YJR137C	S000003898	ORF	Background_List
YLR384C	MATCH	1	IKI3	S. cerevisiae	Insensitive to KIller toxin	4050	YLR384C	S000004376	ORF	Background_List
YGL116W	MATCH	1	CDC20	S. cerevisiae	Cell Division Cycle	1833	YGL116W	S000003084	ORF	Background_List
YNL138W-A	MATCH	1	YSF3	S. cerevisiae	Yeast Splicing Factor 3b subunit	380	YNL138W-A	S000028509	ORF	Background_List
YNR050C	MATCH	1	LYS9	S. cerevisiae	LYSine requiring	1341	YNR050C	S000005333	ORF	Background_List
YKL041W	MATCH	1	VPS24	S. cerevisiae	Vacuolar Protein Sorting	675	YKL041W	S000001524	ORF	Background_List
YNL137C	MATCH	1	NAM9	S. cerevisiae	Nuclear Accommodation of Mitochondria	1461	YNL137C	S000005081	ORF	Background_List
YER012W	MATCH	1	PRE1	S. cerevisiae	PRoteinase yscE	597	YER012W	S000000814	ORF	Background_List
YBR171W	MATCH	1	SEC66	S. cerevisiae	SECretory	621	YBR171W	S000000375	ORF	Background_List
YLR032W	MATCH	1	RAD5	S. cerevisiae	RADiation sensitive	3510	YLR032W	S000004022	ORF	Background_List
YOR212W	MATCH	1	STE4	S. cerevisiae	STErile	1272	YOR212W	S000005738	ORF	Background_List
YDR427W	MATCH	1	RPN9	S. cerevisiae	Regulatory Particle Non-ATPase	1182	YDR427W	S000002835	ORF	Background_List
YNL222W	MATCH	1	SSU72	S. cerevisiae	Suppressor of SUa7, gene 2	621	YNL222W	S000005166	ORF	Background_List
YGL201C	MATCH	1	MCM6	S. cerevisiae	MiniChromosome Maintenance	3054	YGL201C	S000003169	ORF	Background_List
YHR100C	MATCH	1	GEP4	S. cerevisiae	GEnetic interactors of Prohibitins	558	YHR100C	S000001142	ORF	Background_List
YGL115W	MATCH	1	SNF4	S. cerevisiae	Sucrose NonFermenting	969	YGL115W	S000003083	ORF	Background_List
YGR078C	MATCH	1	PAC10	S. cerevisiae	Perish in the Absence of Cin8p	600	YGR078C	S000003310	ORF	Background_List
YLR250W	MATCH	1	SSP120	S. cerevisiae	Saccharomyces Secretory Protein	705	YLR250W	S000004240	ORF	Background_List
YOR128C	MATCH	1	ADE2	S. cerevisiae	ADEnine requiring	1716	YOR128C	S000005654	ORF	Background_List
YBL039C	MATCH	1	URA7	S. cerevisiae	URAcil requiring	1740	YBL039C	S000000135	ORF	Background_List
YGR163W	MATCH	1	GTR2	S. cerevisiae	GTp binding protein Resemblance	1026	YGR163W	S000003395	ORF	Background_List
YNL221C	MATCH	1	POP1	S. cerevisiae	Processing Of Precursor RNAs	2628	YNL221C	S000005165	ORF	Background_List
YLR034C	MATCH	1	SMF3	S. cerevisiae		1422	YLR034C	S000004024	ORF	Background_List
YHR148W	MATCH	1	IMP3	S. cerevisiae	Interacting with Mpp10p	552	YHR148W	S000001191	ORF	Background_List
YJR002W	MATCH	1	MPP10	S. cerevisiae	M Phase Phosphoproteins	1782	YJR002W	S000003762	ORF	Background_List
YNL003C	MATCH	1	PET8	S. cerevisiae	PETite colonies	855	YNL003C	S000004948	ORF	Background_List
YIL145C	MATCH	1	PAN6	S. cerevisiae	PANtothenate biosynthesis	930	YIL145C	S000001407	ORF	Background_List
YHR016C	MATCH	1	YSC84	S. cerevisiae		1575	YHR016C	S000001058	ORF	Background_List
YLR299W	MATCH	1	ECM38	S. cerevisiae	ExtraCellular Mutant	1983	YLR299W	S000004290	ORF	Background_List
YPL167C	MATCH	1	REV3	S. cerevisiae	REVersionless	4515	YPL167C	S000006088	ORF	Background_List
YMR128W	MATCH	1	ECM16	S. cerevisiae	ExtraCellular Mutant	3804	YMR128W	S000004735	ORF	Background_List
YER145C	MATCH	1	FTR1	S. cerevisiae	Fe TRansporter	1215	YER145C	S000000947	ORF	Background_List
YBL038W	MATCH	1	MRPL16	S. cerevisiae	Mitochondrial Ribosomal Protein, Large subunit	699	YBL038W	S000000134	ORF	Background_List
YBR087W	MATCH	1	RFC5	S. cerevisiae	Replication Factor C	1065	YBR087W	S000000291	ORF	Background_List
YGL200C	MATCH	1	EMP24	S. cerevisiae	EndoMembrane Protein	612	YGL200C	S000003168	ORF	Background_List
YBR088C	MATCH	1	POL30	S. cerevisiae	POLymerase	777	YBR088C	S000000292	ORF	Background_List
YDR511W	MATCH	1	SDH7	S. cerevisiae	Succinate DeHydrogenase	402	YDR511W	S000002919	ORF	Background_List
YGL114W	MATCH	1		S. cerevisiae		2178	YGL114W	S000003082	ORF	Background_List
YBR173C	MATCH	1	UMP1	S. cerevisiae	Ubiquitin-Mediated Proteolysis	447	YBR173C	S000000377	ORF	Background_List
YLR251W	MATCH	1	SYM1	S. cerevisiae	Stress-inducible Yeast Mpv17	594	YLR251W	S000004241	ORF	Background_List
YPL252C	MATCH	1	YAH1	S. cerevisiae	Yeast Adrenodoxin Homolog	519	YPL252C	S000006173	ORF	Background_List
YNL002C	MATCH	1	RLP7	S. cerevisiae	Ribosomal-Like Protein	969	YNL002C	S000004947	ORF	Background_List
YLR382C	MATCH	1	NAM2	S. cerevisiae	Nuclear Accommodation of Mitochondria	2685	YLR382C	S000004374	ORF	Background_List
YGL029W	MATCH	1	CGR1	S. cerevisiae	Coiled-coil Growth-Regulated	363	YGL029W	S000002997	ORF	Background_List
YPL079W	MATCH	1	RPL21B	S. cerevisiae	Ribosomal Protein of the Large subunit	904	YPL079W	S000006000	ORF	Background_List
YER058W	MATCH	1	PET117	S. cerevisiae	PETite colonies	324	YER058W	S000000860	ORF	Background_List
YDL067C	MATCH	1	COX9	S. cerevisiae	Cytochrome c OXidase	180	YDL067C	S000002225	ORF	Background_List
YJR001W	MATCH	1	AVT1	S. cerevisiae	Amino acid Vacuolar Transport	1809	YJR001W	S000003761	ORF	Background_List
YNL135C	MATCH	1	FPR1	S. cerevisiae	Fk 506-sensitive Proline Rotamase	345	YNL135C	S000005079	ORF	Background_List
YER143W	MATCH	1	DDI1	S. cerevisiae	DNA Damage Inducible	1287	YER143W	S000000945	ORF	Background_List
YNL268W	MATCH	1	LYP1	S. cerevisiae	LYsine-specific Permease	1836	YNL268W	S000005212	ORF	Background_List
YDL066W	MATCH	1	IDP1	S. cerevisiae	Isocitrate Dehydrogenase, NADP-specific	1287	YDL066W	S000002224	ORF	Background_List
YGR076C	MATCH	1	MRPL25	S. cerevisiae	Mitochondrial Ribosomal Protein, Large subunit	474	YGR076C	S000003308	ORF	Background_List
YNL220W	MATCH	1	ADE12	S. cerevisiae	ADEnine requiring	1302	YNL220W	S000005164	ORF	Background_List
YOR210W	MATCH	1	RPB10	S. cerevisiae	RNA Polymerase B	213	YOR210W	S000005736	ORF	Background_List
YLL029W	MATCH	1	FRA1	S. cerevisiae	Fe Repressor of Activation	2250	YLL029W	S000003952	ORF	Background_List
YOR211C	MATCH	1	MGM1	S. cerevisiae	Mitochondrial Genome Maintenance	2646	YOR211C	S000005737	ORF	Background_List
YPL031C	MATCH	1	PHO85	S. cerevisiae	PHOsphate metabolism	1020	YPL031C	S000005952	ORF	Background_List
YKL040C	MATCH	1	NFU1	S. cerevisiae	NifU-like protein	771	YKL040C	S000001523	ORF	Background_List
YML085C	MATCH	1	TUB1	S. cerevisiae	TUBulin	1460	YML085C	S000004550	ORF	Background_List
YPR082C	MATCH	1	DIB1	S. cerevisiae	S. pombe DIm1+ in Budding yeast	432	YPR082C	S000006286	ORF	Background_List
YOR259C	MATCH	1	RPT4	S. cerevisiae	Regulatory Particle Triple-A protein, or Regulatory Particle Triphosphatase	1314	YOR259C	S000005785	ORF	Background_List
YOR126C	MATCH	1	IAH1	S. cerevisiae	Isoamyl Acetate-Hydrolyzing esterase	717	YOR126C	S000005652	ORF	Background_List
YKL174C	MATCH	1	TPO5	S. cerevisiae	Transporter of POlyamines	1857	YKL174C	S000001657	ORF	Background_List
YJR049C	MATCH	1	UTR1	S. cerevisiae	Unidentified TRanscript	1593	YJR049C	S000003810	ORF	Background_List
YMR300C	MATCH	1	ADE4	S. cerevisiae	ADEnine requiring	1533	YMR300C	S000004915	ORF	Background_List
YIL142W	MATCH	1	CCT2	S. cerevisiae	Chaperonin Containing TCP-1	1584	YIL142W	S000001404	ORF	Background_List
YBR170C	MATCH	1	NPL4	S. cerevisiae	Nuclear Protein Localization	1743	YBR170C	S000000374	ORF	Background_List
YKL173W	MATCH	1	SNU114	S. cerevisiae	Small NUclear ribonucleoprotein associated	3027	YKL173W	S000001656	ORF	Background_List
YMR214W	MATCH	1	SCJ1	S. cerevisiae	S. Cerevisiae DnaJ	1134	YMR214W	S000004827	ORF	Background_List
YJR133W	MATCH	1	XPT1	S. cerevisiae	Xanthine Phosphoribosyl Transferase	630	YJR133W	S000003894	ORF	Background_List
YCR028C	MATCH	1	FEN2	S. cerevisiae	FENpropimorph resistance	1539	YCR028C	S000000623	ORF	Background_List
YIL143C	MATCH	1	SSL2	S. cerevisiae	Suppressor of Stem-Loop mutation	2532	YIL143C	S000001405	ORF	Background_List
YHR018C	MATCH	1	ARG4	S. cerevisiae	ARGinine requiring	1392	YHR018C	S000001060	ORF	Background_List
YJR048W	MATCH	1	CYC1	S. cerevisiae	CYtochrome C	330	YJR048W	S000003809	ORF	Background_List
YNL267W	MATCH	1	PIK1	S. cerevisiae	Phosphatidyl Inositol Kinase	3201	YNL267W	S000005211	ORF	Background_List
YGL028C	MATCH	1	SCW11	S. cerevisiae	Soluble Cell Wall protein	1629	YGL028C	S000002996	ORF	Background_List
YGL246C	MATCH	1	RAI1	S. cerevisiae	Rat1p Interacting Protein	1164	YGL246C	S000003215	ORF	Background_List
YMR215W	MATCH	1	GAS3	S. cerevisiae	Glycophospholipid-Anchored Surface protein	1575	YMR215W	S000004828	ORF	Background_List
YNL001W	MATCH	1	DOM34	S. cerevisiae	Duplication Of Multilocus region	1161	YNL001W	S000004946	ORF	Background_List
YER010C	MATCH	1		S. cerevisiae		705	YER010C	S000000812	ORF	Background_List
YGL245W	MATCH	1	GUS1	S. cerevisiae	GlUtamyl-tRNA Synthetase	2127	YGL245W	S000003214	ORF	Background_List
YOR125C	MATCH	1	CAT5	S. cerevisiae	CATabolite repression	702	YOR125C	S000005651	ORF	Background_List
YDR429C	MATCH	1	TIF35	S. cerevisiae	Translation Initiation Factor	825	YDR429C	S000002837	ORF	Background_List
YKL046C	MATCH	1	DCW1	S. cerevisiae	Defective Cell Wall	1350	YKL046C	S000001529	ORF	Background_List
YDR297W	MATCH	1	SUR2	S. cerevisiae	SUppressor of Rvs161 and rvs167 mutations	1050	YDR297W	S000002705	ORF	Background_List
YPL215W	MATCH	1	CBP3	S. cerevisiae	Cytochrome B mRNA Processing	1008	YPL215W	S000006136	ORF	Background_List
YPR004C	MATCH	1	AIM45	S. cerevisiae	Altered Inheritance rate of Mitochondria	1035	YPR004C	S000006208	ORF	Background_List
YDR079W	MATCH	1	PET100	S. cerevisiae	PETite colonies	336	YDR079W	S000002486	ORF	Background_List
YKL179C	MATCH	1	COY1	S. cerevisiae	CASP Of Yeast	2040	YKL179C	S000001662	ORF	Background_List
YMR301C	MATCH	1	ATM1	S. cerevisiae	ABC Transporter, Mitochondrial	2073	YMR301C	S000004916	ORF	Background_List
YNL185C	MATCH	1	MRPL19	S. cerevisiae	Mitochondrial Ribosomal Protein, Large subunit	477	YNL185C	S000005129	ORF	Background_List
YER004W	MATCH	1	FMP52	S. cerevisiae	Found in Mitochondrial Proteome	696	YER004W	S000000806	ORF	Background_List
YGL164C	MATCH	1	YRB30	S. cerevisiae	Yeast Ran Binder	1323	YGL164C	S000003132	ORF	Background_List
YKL045W	MATCH	1	PRI2	S. cerevisiae	DNA PRImase	1587	YKL045W	S000001528	ORF	Background_List
YBR228W	MATCH	1	SLX1	S. cerevisiae	Synthetic Lethal of unknown (X) function	915	YBR228W	S000000432	ORF	Background_List
YBL080C	MATCH	1	PET112	S. cerevisiae	PETite colonies	1626	YBL080C	S000000176	ORF	Background_List
YGL030W	MATCH	1	RPL30	S. cerevisiae	Ribosomal Protein of the Large subunit	548	YGL030W	S000002998	ORF	Background_List
YOR163W	MATCH	1	DDP1	S. cerevisiae	Diadenosine and Diphosphoinositol Polyphosphate phosphohydrolase	567	YOR163W	S000005689	ORF	Background_List
YGR171C	MATCH	1	MSM1	S. cerevisiae	Mitochondrial aminoacyl-tRNA Synthetase, Methionine	1728	YGR171C	S000003403	ORF	Background_List
YKR053C	MATCH	1	YSR3	S. cerevisiae	Yeast Sphingolipid Resistance	1215	YKR053C	S000001761	ORF	Background_List
YPR137W	MATCH	1	RRP9	S. cerevisiae	Ribosomal RNA Processing	1722	YPR137W	S000006341	ORF	Background_List
YDR032C	MATCH	1	PST2	S. cerevisiae	Protoplasts-SecreTed	597	YDR032C	S000002439	ORF	Background_List
YGR086C	MATCH	1	PIL1	S. cerevisiae	Phosphorylation Inhibited by Long chain bases	1020	YGR086C	S000003318	ORF	Background_List
YBR229C	MATCH	1	ROT2	S. cerevisiae	Reversal Of Tor2 lethality	2865	YBR229C	S000000433	ORF	Background_List
YDR298C	MATCH	1	ATP5	S. cerevisiae	ATP synthase	639	YDR298C	S000002706	ORF	Background_List
YHR144C	MATCH	1	DCD1	S. cerevisiae	dCMP Deaminase	939	YHR144C	S000001187	ORF	Background_List
YDR382W	MATCH	1	RPP2B	S. cerevisiae	Ribosomal Protein P2 Beta	333	YDR382W	S000002790	ORF	Background_List
YDR031W	MATCH	1	MIX14	S. cerevisiae	Mitochondrial Intermembrane space CX(n)C motif protein	366	YDR031W	S000002438	ORF	Background_List
YNL099C	MATCH	1	OCA1	S. cerevisiae	Oxidant-induced Cell-cycle Arrest	717	YNL099C	S000005043	ORF	Background_List
YDR296W	MATCH	1	MHR1	S. cerevisiae	Mitochondrial Homologous Recombination	681	YDR296W	S000002704	ORF	Background_List
YHL003C	MATCH	1	LAG1	S. cerevisiae	Longevity Assurance Gene	1236	YHL003C	S000000995	ORF	Background_List
YPR003C	MATCH	1		S. cerevisiae		2265	YPR003C	S000006207	ORF	Background_List
YLR244C	MATCH	1	MAP1	S. cerevisiae	Methionine AminoPeptidase	1164	YLR244C	S000004234	ORF	Background_List
YMR302C	MATCH	1	YME2	S. cerevisiae	Yeast Mitochondrial Escape	2553	YMR302C	S000004917	ORF	Background_List
YIL109C	MATCH	1	SEC24	S. cerevisiae	SECretory	2781	YIL109C	S000001371	ORF	Background_List
YGL078C	MATCH	1	DBP3	S. cerevisiae	Dead Box Protein	1572	YGL078C	S000003046	ORF	Background_List
YDL111C	MATCH	1	RRP42	S. cerevisiae	Ribosomal RNA Processing	798	YDL111C	S000002269	ORF	Background_List
YER136W	MATCH	1	GDI1	S. cerevisiae	GDP Dissociation Inhibitor	1356	YER136W	S000000938	ORF	Background_List
YGL163C	MATCH	1	RAD54	S. cerevisiae	RADiation sensitive	2697	YGL163C	S000003131	ORF	Background_List
YHR011W	MATCH	1	DIA4	S. cerevisiae	Digs Into Agar	1341	YHR011W	S000001053	ORF	Background_List
YLR243W	MATCH	1	GPN3	S. cerevisiae	Gly-Pro-Asn (N) motif	819	YLR243W	S000004233	ORF	Background_List
YGR087C	MATCH	1	PDC6	S. cerevisiae	Pyruvate DeCarboxylase	1692	YGR087C	S000003319	ORF	Background_List
YIR029W	MATCH	1	DAL2	S. cerevisiae	Degradation of Allantoin	1032	YIR029W	S000001468	ORF	Background_List
YLR025W	MATCH	1	SNF7	S. cerevisiae	Sucrose NonFermenting	723	YLR025W	S000004015	ORF	Background_List
YGR172C	MATCH	1	YIP1	S. cerevisiae	Ypt-Interacting Protein	747	YGR172C	S000003404	ORF	Background_List
YMR217W	MATCH	1	GUA1	S. cerevisiae	GUanine Auxotroph	1578	YMR217W	S000004830	ORF	Background_List
YLR377C	MATCH	1	FBP1	S. cerevisiae	Fructose-1,6-BisPhosphatase	1047	YLR377C	S000004369	ORF	Background_List
YLR026C	MATCH	1	SED5	S. cerevisiae	Suppressor of Erd2 Deletion	1023	YLR026C	S000004016	ORF	Background_List
YDR299W	MATCH	1	BFR2	S. cerevisiae	BreFeldin A Resistance	1605	YDR299W	S000002707	ORF	Background_List
YER002W	MATCH	1	NOP16	S. cerevisiae	NucleOlar Protein	696	YER002W	S000000804	ORF	Background_List
YCL054W	MATCH	1	SPB1	S. cerevisiae	Suppressor of PaB1 mutant	2526	YCL054W	S000000559	ORF	Background_List
YDL022W	MATCH	1	GPD1	S. cerevisiae	Glycerol-3-Phosphate Dehydrogenase	1176	YDL022W	S000002180	ORF	Background_List
YML080W	MATCH	1	DUS1	S. cerevisiae	DihydroUridine Synthase	1272	YML080W	S000004545	ORF	Background_List
YOR294W	MATCH	1	RRS1	S. cerevisiae	Regulator of Ribosome Synthesis	612	YOR294W	S000005820	ORF	Background_List
YER003C	MATCH	1	PMI40	S. cerevisiae	PhosphoMannose Isomerase	1383	YER003C	S000000805	ORF	Background_List
YHR013C	MATCH	1	ARD1	S. cerevisiae	ARrest Defective	717	YHR013C	S000001055	ORF	Background_List
YPL129W	MATCH	1	TAF14	S. cerevisiae	TATA binding protein-Associated Factor	840	YPL129W	S000006050	ORF	Background_List
YPR138C	MATCH	1	MEP3	S. cerevisiae		1470	YPR138C	S000006342	ORF	Background_List
YDR165W	MATCH	1	TRM82	S. cerevisiae	Transfer RNA Methyltransferase	1335	YDR165W	S000002572	ORF	Background_List
YOL112W	MATCH	1	MSB4	S. cerevisiae	Multicopy Suppression of a Budding defect	1479	YOL112W	S000005472	ORF	Background_List
YOR161C	MATCH	1	PNS1	S. cerevisiae	pH Nine Sensitive	1620	YOR161C	S000005687	ORF	Background_List
YGL076C	MATCH	1	RPL7A	S. cerevisiae	Ribosomal Protein of the Large subunit	1662	YGL076C	S000003044	ORF	Background_List
YDL157C	MATCH	1		S. cerevisiae		357	YDL157C	S000002316	ORF	Background_List
YER049W	MATCH	1	TPA1	S. cerevisiae	Termination and PolyAdenylation	1935	YER049W	S000000851	ORF	Background_List
YHL004W	MATCH	1	MRP4	S. cerevisiae	Mitochondrial Ribosomal Protein	1185	YHL004W	S000000996	ORF	Background_List
YNL181W	MATCH	1	PBR1	S. cerevisiae	Potentiates Bioactive compound Response	1224	YNL181W	S000005125	ORF	Background_List
YHR147C	MATCH	1	MRPL6	S. cerevisiae	Mitochondrial Ribosomal Protein, Large subunit	645	YHR147C	S000001190	ORF	Background_List
YLR241W	MATCH	1	CSC1	S. cerevisiae	Calcium permeable Stress-gated cation Channel	2349	YLR241W	S000004231	ORF	Background_List
YHR039C-A	MATCH	1	VMA10	S. cerevisiae		507	YHR039C-A	S000002100	ORF	Background_List
YLR289W	MATCH	1	GUF1	S. cerevisiae	Gtpase of Unknown Function	1938	YLR289W	S000004280	ORF	Background_List
YMR304W	MATCH	1	UBP15	S. cerevisiae	UBiquitin-specific Protease	3693	YMR304W	S000004920	ORF	Background_List
YGR085C	MATCH	1	RPL11B	S. cerevisiae	Ribosomal Protein of the Large subunit	525	YGR085C	S000003317	ORF	Background_List
YDL156W	MATCH	1	CMR1	S. cerevisiae	Changed Mutation Rate	1569	YDL156W	S000002315	ORF	Background_List
YNL274C	MATCH	1	GOR1	S. cerevisiae	GlyOxylate Reductase	1053	YNL274C	S000005218	ORF	Background_List
YMR305C	MATCH	1	SCW10	S. cerevisiae	Soluble Cell Wall protein	1170	YMR305C	S000004921	ORF	Background_List
YKL135C	MATCH	1	APL2	S. cerevisiae	clathrin Adaptor Protein complex Large chain	2181	YKL135C	S000001618	ORF	Background_List
YHR187W	MATCH	1	IKI1	S. cerevisiae	Insensitive to KIller toxin	930	YHR187W	S000001230	ORF	Background_List
YGL120C	MATCH	1	PRP43	S. cerevisiae	Pre-mRNA Processing	2304	YGL120C	S000003088	ORF	Background_List
YPL211W	MATCH	1	NIP7	S. cerevisiae	Nuclear ImPort	546	YPL211W	S000006132	ORF	Background_List
YOR252W	MATCH	1	TMA16	S. cerevisiae	Translation Machinery Associated	537	YOR252W	S000005778	ORF	Background_List
YNR032C-A	MATCH	1	HUB1	S. cerevisiae	Homologous to UBiquitin	222	YNR032C-A	S000007251	ORF	Background_List
YDR294C	MATCH	1	DPL1	S. cerevisiae	Dihydrosphingosine Phosphate Lyase	1770	YDR294C	S000002702	ORF	Background_List
YKL002W	MATCH	1	DID4	S. cerevisiae	Doa4-Independent Degradation	767	YKL002W	S000001485	ORF	Background_List
YLR113W	MATCH	1	HOG1	S. cerevisiae	High Osmolarity Glycerol response	1308	YLR113W	S000004103	ORF	Background_List
YNL189W	MATCH	1	SRP1	S. cerevisiae	Suppressor of Rna Polymerase I	1629	YNL189W	S000005133	ORF	Background_List
YPL259C	MATCH	1	APM1	S. cerevisiae	clathrin Adaptor Protein complex Medium chain	1428	YPL259C	S000006180	ORF	Background_List
YHR188C	MATCH	1	GPI16	S. cerevisiae	GlycosylPhosphatidylInositol anchor biosynthesis	1833	YHR188C	S000001231	ORF	Background_List
YIL106W	MATCH	1	MOB1	S. cerevisiae	Mps One Binder	1030	YIL106W	S000001368	ORF	Background_List
YNL055C	MATCH	1	POR1	S. cerevisiae	PORin	852	YNL055C	S000005000	ORF	Background_List
YBR091C	MATCH	1	TIM12	S. cerevisiae	Translocase of the Inner Membrane	330	YBR091C	S000000295	ORF	Background_List
YKL003C	MATCH	1	MRP17	S. cerevisiae	Mitochondrial Ribosomal Protein	396	YKL003C	S000001486	ORF	Background_List
YGL252C	MATCH	1	RTG2	S. cerevisiae	ReTroGrade regulation	1767	YGL252C	S000003221	ORF	Background_List
YPL212C	MATCH	1	PUS1	S. cerevisiae	PseudoUridine Synthase	1635	YPL212C	S000006133	ORF	Background_List
YDR293C	MATCH	1	SSD1	S. cerevisiae	Suppressor of SIT4 Deletion	3753	YDR293C	S000002701	ORF	Background_List
YGL167C	MATCH	1	PMR1	S. cerevisiae	Plasma Membrane ATPase Related	2853	YGL167C	S000003135	ORF	Background_List
YDL029W	MATCH	1	ARP2	S. cerevisiae	Actin-Related Protein	1299	YDL029W	S000002187	ORF	Background_List
YDL247W	MATCH	1	MPH2	S. cerevisiae	Maltose Permease Homolog	1830	YDL247W	S000002406	ORF	Background_List
YHR141C	MATCH	1	RPL42B	S. cerevisiae	Ribosomal Protein of the Large subunit	762	YHR141C	S000001183	ORF	Background_List
YGR082W	MATCH	1	TOM20	S. cerevisiae	Translocase of the Outer Mitochondrial membrane	552	YGR082W	S000003314	ORF	Background_List
YDR074W	MATCH	1	TPS2	S. cerevisiae	Trehalose-6-Phosphate Synthase/phosphatase	2691	YDR074W	S000002481	ORF	Background_List
YAR035W	MATCH	1	YAT1	S. cerevisiae		2064	YAR035W	S000000080	ORF	Background_List
YER006W	MATCH	1	NUG1	S. cerevisiae	NUclear GTPase	1563	YER006W	S000000808	ORF	Background_List
YOR251C	MATCH	1	TUM1	S. cerevisiae	ThioUridine Modification	915	YOR251C	S000005777	ORF	Background_List
YOL115W	MATCH	1	PAP2	S. cerevisiae	Poly(A) Polymerase	1755	YOL115W	S000005475	ORF	Background_List
YIL104C	MATCH	1	SHQ1	S. cerevisiae	Small nucleolar RNAs of the box H/ACA family Quantitative accumulation	1524	YIL104C	S000001366	ORF	Background_List
YMR307W	MATCH	1	GAS1	S. cerevisiae	Glycophospholipid-Anchored Surface protein	1680	YMR307W	S000004924	ORF	Background_List
YMR080C	MATCH	1	NAM7	S. cerevisiae	Nuclear Accommodation of Mitochondria	2916	YMR080C	S000004685	ORF	Background_List
YOR165W	MATCH	1	SEY1	S. cerevisiae	Synthetic Enhancement of YOP1	2331	YOR165W	S000005691	ORF	Background_List
YLR378C	MATCH	1	SEC61	S. cerevisiae	SECretory	1443	YLR378C	S000004370	ORF	Background_List
YLR027C	MATCH	1	AAT2	S. cerevisiae	Aspartate AminoTransferase	1257	YLR027C	S000004017	ORF	Background_List
YDL159W	MATCH	1	STE7	S. cerevisiae	STErile	1548	YDL159W	S000002318	ORF	Background_List
YLR245C	MATCH	1	CDD1	S. cerevisiae	CytiDine Deaminase	429	YLR245C	S000004235	ORF	Background_List
YDR380W	MATCH	1	ARO10	S. cerevisiae	AROmatic amino acid requiring	1908	YDR380W	S000002788	ORF	Background_List
YKL001C	MATCH	1	MET14	S. cerevisiae	METhionine requiring	609	YKL001C	S000001484	ORF	Background_List
YKL134C	MATCH	1	2001-10-01	S. cerevisiae	OCTapeptidyl aminopeptidase	2319	YKL134C	S000001617	ORF	Background_List
YKR097W	MATCH	1	PCK1	S. cerevisiae	Phosphoenolpyruvate CarboxyKinase	1650	YKR097W	S000001805	ORF	Background_List
YHR142W	MATCH	1	CHS7	S. cerevisiae	CHitin Synthase-related	951	YHR142W	S000001184	ORF	Background_List
YNL052W	MATCH	1	COX5A	S. cerevisiae	Cytochrome c OXidase	462	YNL052W	S000004997	ORF	Background_List
YER005W	MATCH	1	YND1	S. cerevisiae	Yeast Nucleoside Diphosphatase	1893	YER005W	S000000807	ORF	Background_List
YPL125W	MATCH	1	KAP120	S. cerevisiae	KAryoPherin	3099	YPL125W	S000006046	ORF	Background_List
YMR308C	MATCH	1	PSE1	S. cerevisiae	Protein Secretion Enhancer	3270	YMR308C	S000004925	ORF	Background_List
YLR330W	MATCH	1	CHS5	S. cerevisiae	CHitin Synthase-related	2016	YLR330W	S000004322	ORF	Background_List
YIL103W	MATCH	1	DPH1	S. cerevisiae	DiPHthamide biosynthesis	1278	YIL103W	S000001365	ORF	Background_List
YIL018W	MATCH	1	RPL2B	S. cerevisiae	Ribosomal Protein of the Large subunit	1165	YIL018W	S000001280	ORF	Background_List
YBR268W	MATCH	1	MRPL37	S. cerevisiae	Mitochondrial Ribosomal Protein, Large subunit	318	YBR268W	S000000472	ORF	Background_List
YMR309C	MATCH	1	NIP1	S. cerevisiae	Nuclear ImPort	2439	YMR309C	S000004926	ORF	Background_List
YLR420W	MATCH	1	URA4	S. cerevisiae	URAcil requiring	1095	YLR420W	S000004412	ORF	Background_List
YOL064C	MATCH	1	MET22	S. cerevisiae	METhionine requiring	1074	YOL064C	S000005425	ORF	Background_List
YKL139W	MATCH	1	CTK1	S. cerevisiae	Carboxy-Terminal domain Kinase	1587	YKL139W	S000001622	ORF	Background_List
YLR203C	MATCH	1	MSS51	S. cerevisiae	Mitochondrial Splicing Suppressor	1311	YLR203C	S000004193	ORF	Background_List
[truncated: 702 more rows]

## Sheet: Table S5
Table S5: Gene list of candidate genes (Colomer et al. 2020) with positions in the reference genome UMY321 (Fournier et al. 2017, Gounot et al. 2020).
Gene	Name	Function	ScaffoldNumber	Position_Start	Position_End
MAL11	YGR289C	Maltose assimilation	DEBR0S1	59063	60745
IMA1	YGR287C	Maltose assimilation	DEBR0S1	62767	64512
MAL31	YBR298C	Maltose assimilation	DEBR0S1	72290	73993
ILV6	YCL009C	Diacetyl production	DEBR0S1	167388	168278
ADH3	YMR083W	Ethanol production	DEBR0S1	472125	473240
CEN1	CEN1	Genome rearrangement	DEBR0S1	1032335	1033243
BGL1/EXG1	YLR300W	Beta-glucoside release	DEBR0S1	1134026	1135216
CEN2	CEN2	Genome rearrangement	DEBR0S1	1181860	1183785
ADH2	YMR303C	Ethanol production	DEBR0S1	1344674	1345717
MET5	YJR137C	Sulphite tolerance	DEBR0S1	2225055	2228720
ILV5	YLR355C	Diacetyl production	DEBR0S1	2397105	2398157
ATF1	YOR377W	Ester production	DEBR0S1	3019885	3020430
MPH2/MPH3	MPH2/MPH3	Maltose assimilation	DEBR0S1	3819594	3821228
ADH6	YMR318C	Ethanol production	DEBR0S2	156319	157359
HYE3	HYE3	Monoterpene alcohol conversion	DEBR0S2	176237	177448
SODC	SODC	Phenolic off-flavor	DEBR0S2	739571	740032
IMA1	YGR287C	Maltose assimilation	DEBR0S2	981778	983184
SSU1	YPL092W	Sulphite tolerance	DEBR0S2	1349340	1350395
BAT2	YJR148W	Ester production	DEBR0S2	1634791	1635897
ADH3	YMR083W	Ethanol production	DEBR0S2	1652971	1654101
BGL2	YGR282C	Beta-glucoside release	DEBR0S2	1905398	1906894
ILV3	YJR016C	Diacetyl production	DEBR0S2	2027789	2029540
MAL12	YGR292W	Maltose assimilation	DEBR0S2	2185677	2187416
FLO9	YAL063C	Flocculation	DEBR0S2	2236198	2236527
BDH1	YAL060W	Diacetyl production	DEBR0S3	355660	356784
ARO80	YDR421W	Ester production	DEBR0S3	768623	769225
ARO1	YDR127W	Ester production	DEBR0S3	828098	829831
EHT1	YBR177C	Ester production	DEBR0S3	849879	851153
FLO8	YER109C	Flocculation	DEBR0S3	1029708	1030052
ADH6	YMR318C	Ethanol production	DEBR0S3	1182645	1183397
ARO8	YGL202W	Ester production	DEBR0S3	1728373	1729794
ARO3	YDR035W	Ester production	DEBR0S3	1888830	1889933
YNR1	Nitrate redictase	Nitrate assimilation	DEBR0S4	17288	18424
YNI1	Nitrate redictase	Nitrate assimilation	DEBR0S4	20916	24110
IMA1	YGR287C	Maltose assimilation	DEBR0S4	29928	31676
ARO10	YDR380W	Ester production	DEBR0S4	200219	201979
YAT2	YER024W	Ester production	DEBR0S4	980326	981087
YNT1	YDR394W	Nitrate assimilation	DEBR0S4	1172389	1173654
ILV2	YMR108W	Diacetyl production	DEBR0S4	1343318	1345129
MAL61	Maltose permease	Maltose assimilation	DEBR0S4	NA	NA
BGL1/EXG1	YLR300W	Beta-glucoside release	DEBR0S5	20658	20756
IAH1	YOR126C	Ester production	DEBR0S5	41785	42669
FLO11	YIR019C	Flocculation	DEBR0S5	65793	66188
ARO4	YBR249C	Ester production	DEBR0S5	108086	109123
ARO10	YDR380W1_1	Ester production	DEBR0S5	259654	260919
GCN4	YEL009C	Ester production	DEBR0S5	548873	549106
ADH6	YMR318C	Ethanol production	DEBR0S5	924446	925558
FLO1	YAR050W	Flocculation	DEBR0S6	682631	683014
FLO1	YAR050W	Flocculation	DEBR0S6	690255	690704
IAH1	YOR126C	Ester production	DEBR0S6	913339	914079
HXT14	YNL318C	Maltose assimilation	DEBR0S6	976598	977992
FLO10	YKR102W	Flocculation	DEBR0S6	1023356	1023757
ADH	NoInfo	Ethanol production	DEBR0S6	1295976	1296494
FLO10	YKR102W	Flocculation	DEBR0S6	1319733	1320104
HYE2	HYE2	Monoterpene alcohol conversion	DEBR0S8	34887	36080
PAD1	YDR538W	Phenolic off-flavor	DEBR0S8	NA	NA

## Sheet: Table S6
Table S6: De novo assemblies of mitochondrial genomes from short read sequencing data.
ID_plate288	YJS_Number	GeneticGroup	Ace_size	scaffolds	Circularised
I_A01_YJS7800	YJS7800	Teq/Etoh	100	1	TRUE
I_A02_YJS7801	YJS7801	Wine2	87	1	FALSE
I_A03_YJS7802	YJS7802	Wine3	89	1	TRUE
I_A05_YJS7804	YJS7804	Wine2	89	1	FALSE
I_A06_YJS7805	YJS7805	Teq/Etoh	100	1	TRUE
I_A07_YJS7806	YJS7806	Wine3	89	1	FALSE
I_A08_YJS7807	YJS7807	Wine2	89	1	TRUE
I_A10_YJS7809	YJS7809	Wine2	88	1	FALSE
I_A11_YJS7810	YJS7810	Beer	89	1	FALSE
I_A12_YJS7811	YJS7811	Wine2	89	1	TRUE
I_B01_YJS7812	YJS7812	Wine2	89	1	TRUE
I_B02_YJS7813	YJS7813	Beer	88	1	TRUE
I_B03_YJS7814	YJS7814	Beer	88	1	TRUE
I_B04_YJS7815	YJS7815	Beer	88	1	TRUE
I_B05_YJS7816	YJS7816	Beer	88	1	TRUE
I_B06_YJS7817	YJS7817	Beer	88	1	TRUE
I_B07_YJS7818	YJS7818	Beer	88	1	FALSE
I_D12_YJS7847	YJS7847	Beer	89	2	NA
I_E01_YJS7848	YJS7848	Wine3	88	2	NA
I_F02_YJS7861	YJS7861	Beer	88	2	NA
I_F11_YJS7870	YJS7870	Beer	88	15	NA
I_G01_YJS7872	YJS7872	Wine1	89	1	FALSE
I_G03_YJS7874	YJS7874	Wine3	89	1	TRUE
I_G11_YJS7882	YJS7882	Beer	89	1	TRUE
I_H04_YJS7887	YJS7887	Wine2	89	1	FALSE
I_H05_YJS7888	YJS7888	Wine3	89	1	FALSE
I_H06_YJS7889	YJS7889	Teq/Etoh	100	1	FALSE
I_H07_YJS7890	YJS7890	Teq/Etoh	102	4	NA
I_H08_YJS7891	YJS7891	Wine2	78	30	NA
I_H12_YJS7895	YJS7895	Beer	89	2	NA
II_A03_YJS7902	YJS7902	Wine1	89	13	NA
II_A06_YJS7905	YJS7905	Wine1	87	6	NA
II_A12_YJS7911	YJS7911	Wine3	89	1	FALSE
II_B03_YJS7914	YJS7914	Wine3	90	1	FALSE
II_B09_YJS7920	YJS7920	Wine3	89	1	TRUE
II_C03_YJS7926	YJS7926	Beer	88	1	TRUE
II_C09_YJS7932	YJS7932	Beer	79	22	NA
II_D10_YJS7945	YJS7945	Beer	88	1	TRUE
II_E02_YJS7949	YJS7949	Wine3	88	1	FALSE
II_E07_YJS7954	YJS7954	Teq/Etoh	100	2	NA
II_F01_YJS7960	YJS7960	Wine2	89	1	FALSE
II_F08_YJS7967	YJS7967	Wine3	89	1	FALSE
II_G08_YJS7979	YJS7979	Wine3	89	1	FALSE
III_A12_YJS8011	YJS8011	Wine3	75	1	TRUE
III_B03_YJS8014	YJS8014	Teq/Etoh	100	1	FALSE
III_B09_YJS8020	YJS8020	Beer	82	21	NA
III_C01_YJS8024	YJS8024	Kombucha	84	3	NA
III_D02_YJS8037	YJS8037	Beer	88	1	FALSE
III_D04_YJS8039	YJS8039	Wine1	89	2	NA
III_D12_YJS8047	YJS8047	Wine1	89	1	TRUE
III_E01_YJS8048	YJS8048	Beer	89	1	TRUE
III_E04_YJS8051	YJS8051	Wine3	89	1	FALSE
III_E10_YJS8057	YJS8057	Wine3	89	1	FALSE
III_F01_YJS8060	YJS8060	Wine3	89	1	FALSE
III_F02_YJS8061	YJS8061	Wine3	89	1	FALSE
III_F03_YJS8062	YJS8062	Wine3	88	1	TRUE
III_F09_YJS8068	YJS8068	Teq/Etoh	104	1	TRUE
III_F11_YJS8070	YJS8070	Kombucha	89	1	TRUE
III_G06_YJS8077	YJS8077	Beer	88	3	NA
III_G10_YJS8081	YJS8081	Beer	NA	NA	NA
III_G11_YJS8082	YJS8082	Wine1	80	15	NA
III_H04_YJS8087	YJS8087	Beer	88	1	FALSE
III_H05_YJS8088	YJS8088	Beer	64	35	NA
III_H07_YJS8090	YJS8090	Kombucha	79	3	NA
III_H09_YJS8092	YJS8092	Wine1	88	8	NA
III_BOX53_YJS5382	YJS5382	Wine2	89	1	FALSE
III_BOX53_YJS5397	YJS5397	Beer	89	1	TRUE
III_BOX53_YJS5400	YJS5400	Beer	89	1	TRUE
III_BOX53_YJS5408	YJS5408	Wine1	88	4	NA
III_BOX53_YJS5434	YJS5434	Wine1	78	27	NA
III_BOX53_YJS5454	YJS5454	Beer	78	32	NA
